# Supplementary material for: Structure-based design of stabilized recombinant influenza neuraminidase tetramers
Source: PubMed Central journal article supplement (PMC8983682; doi:10.1038/s41467-022-29416-z), 2022-04-05
Supplement: 41467_2022_29416_MOESM3_ESM.pdf [file 41467_2022_29416_MOESM3_ESM.pdf]

All soluble NA head sequences shown below were preceded with either of the following sequences containing secretion signal, affinity tags, hVASP tetramerization domain, thrombin cleavage site and GG linker:

Only Hexa-His tag

MEFGLSWIFLAAIILKGVQCADPHHHHHSSSDYSDLQRVKQELLEEVKKELQKVKEEIEAFVQ  
ELRKRGS�VPRGSGG

Both Hexa-His tag and Strep tag

MEFGLSWIFLAAIILKGVQCADPHHHHHGSAWSHPQFEKGGSSSDYSDLQRVKQELLEEVKKEL  
QKVKEEIEAFVQELRKRGS�VPRGSGG

N1-CA09-WT

H1N1 A/California/07/2009

VKLAGNSSLCPVSGWAIYSKDNSVRIGSKGDVFVIREPFISCSPLECRTFFLTQGALLNDKHSN  
GTIKDRSPYRTLMSCPIGEVPSPYNSRFESVAWSASACHDGINWLTIGISGPDNGAVAVLKYNG  
IITDTIKSWRNNILRTQESEACVNGSCFTVMTDGPNSGQASYKIFRIEKGKIVKSVEMNAPNY  
HYEECSYCPDSSEITCVCRDNWHGNSRNPVVSFNQNLQYQIGYICSGIFGDNPRPNDKTGSCGPV  
SSNGANGVKGFSYKYGNVWIGRTKSISSRNGFEMIWDPNGWGTGTDNNFSIKQDIVGINEWSGY  
SGSFVQHPELTGLDCIRPCFWVELIRGRPKENTIWTSGSSISFCGVNSDTVGSWPDGAELPFT  
IDK

N1-MI15-WT

H1N1 A/Michigan/45/2015

VKLAGNSSLCPVSGWAIYSKDNSVRIGSKGDVFVIREPFISCSPLECRTFFLTQGALLNDKHSN  
GTIKDRSPYRTLMSCPIGEVPSPYNSRFESVAWSASACHDGINWLTIGISGPDNGAVAVLKYNG  
IITDTIKSWRNNILRTQESEACVNGSCFTIMTDGSPDQASYKIFRIEKGKIIKSVEMKAPNY  
HYEECSYCPDSSEITCVCRDNWHGNSRNPVVSFNQNLQYQMGYICSGVFGDNPRPNDKTGSCGPV  
SSNGANGVKGFSFKYGNVWIGRTKSISSRKGFEIWDPNGWGTGTDNKFSIKQDIVGINEWSGY  
SGSFVQHPELTGLDCIRPCFWVELIRGRPEENTIWTSGSSISFCGVNSDTVGSWPDGAELPFT  
IDK

N1-NC99-WT

H1N1 A/New\_Caledonia/20/1999

VTLAGNSSLCSISGWAIYTKDNSIRIGSKGDVFVIREPFISCSHLECRTFFLTQGALLNDKHSN  
GTVKDRSPYRALMSCPGEAPSPYNSKRFESVAWSASACHDGMGWLTIIGISGPDNGAVAVLKYNG  
IITETIKSWKKRILRTQESEACVNGSCFTIMTDGPNSGAASYKIFKIEKGKVTKSIELNAPNF  
HYEECSYCPDTGTVMCVCRDNWHGNSRNPVVSFNQNLQYQIGYICSGVFGDNPRPKDGECSNPV  
TVDGADGVKGFSYKYGNVWIGRTKSNRLRKGFEIWDPNGWTDTDSDFSVKQDVVAITDWSGY  
SGSFVQHPELTGLDCIRPCFWVELVRGLPRENTTIWTSGSSISFCGVNSDTANWSWPDGAELPF  
TIDK

N1-WSN33-WT

H1N1 A/WSN/1933

VILTGNSSLCPIRGWAIHSDKNGIRIGSKGDVFVIREPFISCSHLECRTFFLTQGALLNDKHSR  
GTFKDRSPYRALMSCPVGEAPSPYNSRFESVAWSASACHDGMGWLTIIGISGPDNGAVAVLKYNR  
IITETIKSWRKNILRTQESECTCVNGSCFTIMTDGPDGLASYKIFKIEKGKVTKSIELNAPNS

HYEESCYPDTGKVMCVCRDNWHGSRNPWVSFDQNLDYKIGYICSGVFGDNPRPKDGTGSCGPV  
SADGANGVKGFYSYKYGNVWIGRTKSDSSRHGFEMIWDPNGWTEETDSRFSMRQDVVAITNRSY  
SGSFVQHPELTGLDCMRPCFWVELIRGLPEEDAIWTSGSIISFCGVNSDVTVDWSWPDGAELPFT  
IDK

N1-BV18-WT

H1N1 A/Brevig\_Mission/1/1918

VILTGNSSLCPIISGWAIYSKDNIGIRIGSKGDVFIREFPFISSSHLECRTFFLTQGALLNDKHSN  
GTVKDRSPYRTLMSCPVGEAPSPYNSRFESVAWSASACHDGMWLTIGISGPDNGAVAVLKYNG  
IITDTIKSWRNNILRTQESEECACVNGSCFTIMTDGPSNGQASYKILKIEKGVTKSIELNAPNY  
HYEESCYPDTGKVMCVCRDNWHGSRNPWVSFDQNLDYQIGYICSGVFGDNPRPNDGTGSCGPV  
SSNGANGIKGFSEFRYDNGVWIGRTKSTSSRSGFEMIWDPNGWTEETDSSFSVRQDIVAITDWSY  
SGSFVQHPELTGLDCMRPCFWVELIRGQPKENTIWTSGSSISFCGVNSDVTGWSWPDGAELPFS  
IDK

N1-VN04-WT

H5N1 A/Vietnam/1203/2004

VKLAGNSSLCPINGWAVYSKDNSIRIGSKGDVFIREFPFISSSHLECRTFFLTQGALLNDKHSN  
GTVKDRSPHRTLMSCPVGEAPSPYNSRFESVAWSASACHDGTSWLTIGISGPDNGAVAVLKYNG  
IITDTIKSWRNNILRTQESEECACVNGSCFTVMTDGPSNGQASYKIFKMEKGVVKSVELDAPNY  
HYEESCYPNAGEITCVCRDNWHGSRNPWVSFNQNLLEYQIGYICSGVFGDNPRPNDGTGSCGPV  
SSNGAYGVKGFSEFKYGNVWIGRTKSTNSRSGFEMIWDPNGWTEETDSSFSVKQDIVAITDWSY  
SGSFVQHPELTGLDCIRPCFWVELIRGRPKESTIWTSGSSISFCGVNSDVTGWSWPDGAELPFT  
IDK

N6-SI14-WT

H5N6 A/Sichuan/26221/2014

HLLNLTkPLCEVNSWHILSKDNAIRIGEDAHIIVTREPYLSCDPQGCRMFALSQGTTLRGKHAN  
GTIHDRSPFRALVSWEMGQAPSPYNTRVECIGWSSTSCHDGISRMSICISGPNNNASAVVWYGG  
RPVTEIPSWAGNILRTQESEECVCHGGICPVVMTDGPANNRAETKIIFYFKEGKIKKIEELKGDAQ  
HIEESCYPGASEMIKICRDNWKGANRPVITIDPEMMTHTSKYLCSKILTDTSRPNPDTNGKCE  
APITGGSPDPGVKGFALDGENSWLGRITISKDSRSGYEMLKVPNAETDTQSGAISHQIIVNNQN  
WSGYSGAFIDYWANKECFNPCFYVELIRGRPKESSVLWTSNSIVALCGSKERLGSWSWHDGAEI  
IYFK

N2-MO99-WT

H3N2 A/Moscow/10/1999

EYRNWSKPQCNIITGFAPFSKDNSIRLSAGGDIWVTREPYSVCDPDKCYQFALGQGTTLNNGHSN  
DTVHDRTPYRTLMLNELGVPFHLGKQVCIWSSSSSCHDGGKAWLHVCVTGDDENATASFIYNGR  
LVDSIGSWSKKILRTQESECVINGTCTVVMTDGASGKADTKILFIEEGKIVHTSPLSGSAQH  
VEESCYPYRPGVRCVCRDNWKGSRNPVIDINVKDYSIVSSYVCSGLVGDTPRKNDSSSSSHCL  
DPNNEEGGHGVKGFADDDGNDVVMGRTISEKLRSYETFKVIEGWSKPNKQLQINRQVIIVDRGN  
RSGYSGIFSVKSCINRCFYVELIRGRKQETEVLTWTSNSIVVFCGTSGTGTGWSWPDGADINL  
MPI

N4-DB16-WT

H10N4 A/Red\_knot/Delaware\_Bay/310/2016

VHYSSGRDLCPIRGWAPLSKDNIGIRIGSRGEVFIREFPFISSISECRTFFLTQGALLNDKHSN  
GTVKDRSPFRTLMSPIGVAPSPNSRFESVAWSATACSDGPGWLTGIGITGPDSTAVAVLKYNG  
IITDTLKSWKGNIMRTQESEECVCQDEFQCYTLVTDGSPDAQAFYKILKIRKGIIVSMKDVDATGF  
HFEECSCYPSGTEIECVCRDNWRGSRNPWIRFNSDLDYQIGYVCSGIFGDNPRPVDGTGSCNGP  
VNNGKGRYGVKGFSGFRYGDGVWIGRTKSLESRSGFEMVWDANGWVSTDKDSNGVQDIIDNDNWS  
GYSGSFSIRGETTGKNCTVPCFWVEMIRGQPKEKTIWTSGSSIAFCGVNSDTTGWSWPDGALLP  
FDIDK

N7-NE03-WT

H7N7 A/Netherlands/219/03

SYLLLNKSLCNVEGWVVIKDNVAVRFGSESEQIIVTREPYPVSCDPTGCKMYALHQGTTIRNKHSN  
GTIHDRTAFRGLISTPLGTPPTVSNDFMVCVGSSTTCHDGIARMTICIQGNNDNATATVYYNR  
RLTTTIKTWARNILRTQESEECVCHNGTCAVVMTDGSASSQAYTKVMYFHKGLVVKEEELRGSAR  
HIEECSCYGHNQKVTVCVCRDNWQGANRPIIEIDMSTLEHTSRVCTGILTDTSRPGDKSSGDCS  
NPITGSPGVPVKGFGFLNGDNTWLGRTISPRSRSGFEMLKI PNAGTDPNSRIAERQEIVDNNN  
WSGYSGSFIDYWNDNSECYNPCFYVELIRGRPEEAKYVWWASNSLIALCGSPFPVGSFSFPDGA  
QIQYFS

N8-JD13-WT

H10N8 A/Jiangxi-Donghu/346-2/2013

HFMNTEALCDAKGFAPFSKDNIGIRIGSRGHVFIREFVSCSPTECRTFFLTQGSLLNDKHSN  
GTVKDRSPYRTLMSVEIGQSPNVYQARFEAVAWSATAHDGKRWMTIGVTGPDAKAVAVVHYGG  
IPTDVINSWAGDILRTQESSCTCIQGEFCFWVMTDGPANRQAQYRAFKAQKQKIVGQAEISFNGG  
HIEECSCYPNEGKVECVCKDNWTGTNRVPLVISPDLVSYRVGYLCAGLPSDTPRGEDSQFTGSCT  
SPMGNQGYGVKGFGRQGNVWGMRTISRTSRSGFEILKVRNGWVQNSKEQIKRQVVVDNLNWS  
GYSGSFTLPAELTKRNCLVPCFWVEMIRGNPEEKTIWTSSSSIVMCGVDHEIADWSWHDGAILP  
FDIDKM

N9-AN13-WT

H7N9 A/Anhui/1/2013

NFNNLTKGLCTINSWHIYGKDNVAVRIGESSDVLVTREPYPVSCDPDECFYALSQGTIRGKHSN  
GTIHDRSQYRALISWPLSSPPTVYNSRVEICIGWSSTSCHDGGKSRMSICISGPNNNASAVVWYNR  
RPVAEINTWARNILRTQESEECVCHNGVCPVVFTDGSATGPADTRIYYFKEGKILKWESLTGTAK  
HIEECSCYGERTGITCTCRDNWQGSNRPIQIDPVAMTHTSQYICSPVLTNDNRPNDPNIGKCN  
DPYPGNNNNGVKGFSYLDGANTWLGRTISTASRSGYEMLKVPNALTDDRSKPIQGQTIVLNADW  
SGYSGSFMDYWAEGDCYRACFYVELIRGRPKEDKVVWTSNSIVSMCSSTEFLGQWNWPDGAKIE  
YFL

N2-WI05-WT

H3N2 A/Wisconsin/67/2005

EYRNWSKPQCNIITGFAPFSKDNSIRLSAGGDIWVTREPYPVSCDPDKCYQFALGQGTTLNNVHSN  
DTVHDRTPYRLLMNELGVPFHLGTKQVCIAWSSSSCHDGGKAWLHVCVTGDDKNATASFIYNGR  
LVDSIVSWSKEILRTQESEECVINGTCTVVMTDGSASGKADTKILFIEEGKIVHTSTLSGSAQH

VEECSCYPRYLGVRCVCRDNWKGSNRP IVDINIKDYSIVSSYVCSGLVGDTPRKNDS SSSSHCL  
DPNNEEGGHGVKGWAFDDGNDVWMGRTISEKLRSGYETFKVI EGWSNPNSKLQINRQVI VDRGN  
RSGYSGIFSVEGKSCINRCFYVELIRGRKEETEVLWTSNSI VVFCGTSGT YGTGSWPDGADINL  
MPI

N2-IN11-WT

H3N2 A/Indiana/10/2011

EYRNWSKPQCNI TGFAPFSKDNSIRLSAGGDIWVTREPYVSCDPDKCYQFALGQGTTLNNGHSN  
NTVHDRTPYR TLLMNELGVPFHLGTRQVCMAWSSSSSCHD GKAWLHVCITGNDNNATASFIYNGR  
LVDSIGSWSKNILRTQESECV CINGTCTVVM TDGSASGKADTKILFVEEGKIVHISTLSGSAQH  
VEECSCYPRFPGVRCVCRDNWKGSNRP IVDINVKNYSIVSSYVCSGLVGDTPRKS DSVSSSYCL  
DPNNEKGGHGVKGWAFDDGNDVWMGRTINETLRLGYETFKVI EGWSKANSKLQTNRQVI VEKGD  
RSGYSGIFSVEGKSCINRCFYVELIRGRKEETKVWWT SNSI VVFCGTSGT YGTGSWPDGADINL  
MPI

N3-MI06-WT

H2N3 A/Swine/Missouri/2124514/2006

EEERPFSPLPLCPFRGFFPFHKDNAIRLGENKDVI VITREPYVSCDNDNCWSFALAQGALLGTK  
HSNGTIKDRTPYRSLIRFPIGTAPVLGNYKEICIAWSSSSSCFDGKEWMHVCMTGNDNDASAQII  
YGGRMTDSIKSWRKDILRTQESECCIDGTCVVA VTDGPAANSADYRVYWI REGKIIKYENVPK  
TKIQHLEECSCYVDIDVYICIRDNWKGSNRPW MRINNETILETGYVCSKFHSDTPRPADPSTMS  
CDSPSNVNGGPGVKGFGFKAGDDVWLGR TVSTSGRSGFEI IKVTEGWINS PNHVKSITQTLVSN  
NDWSGYSGSFIVKAKDCFQPCFYVELIRGRPNKNDDVSWT SNSI VTFCLDNEPGSGNWP DGSN  
IGFMPK

N5-DB16-WT

H10N5 A/Shorebird/Delaware\_Bay/309/2016

EFLNNT EPLCNVSGFAIVSKDN GIRIGSRGHV FVIREPFVACGPTECRTFFLTQGALLNDKHSN  
NTVKDRSPYRALMSVPLGSSPNAYQAKFESVAWSATA CHDGKRWLAVGISGADDDAYAVIHYGG  
MPTDVVRSWRKQILRTQESSCVC MKGNCYWVMTDGPANSQASYKIFKSHKGMVTNEREV SFQGG  
HIEECSCYPNLGKVECVCRDNWNGMNR PVLTFDEDLN YEVGYLCAGIPTDTPRVQDNSFIGSCT  
NAVGGSGTNNYGVKGFGFRQGN SVWAGRTVSISSRSGFEI LLVEDGWVKTSKNVVKKVEVLNNK  
NWSGYSGAFTIPI TMTSKQCLVPCFWLEMIRGKPEERTS IWTSSSSTVFCGVSSEVPGWSWDDG  
AILPFDIDKM

B-CO17-WT

B-Victoria B/Colorado/06/2017

PEPEWTPRLS CPGSTFQKALLISPHRFGETKGN SAPLI IREPFVACGPNECKHFAL THYAAQP  
GGYYNGTRGDRNKL RHLISVKLGKI PTVENSIFHMAAWSGSACHDGKEWTYIGVDGPDNNALLK  
VKYGEAYTD TYHSYANNILRTQESACNCIGGNCYLMI TDGSASGVSECRFLKIREGR I I KEIFP  
TGRVKHTEECTCGFASNK TIECACRDNRYTAKRPFVKLN VETDTAEIRLMCTDTYLDTPRPNDG  
SITGPCESDGDKGS GGIKGGFVHQRMKSKI GRWYSRTMSQ TERMGMGLYVKYGGDPWADSDALA  
FSGVMVSMKEPGWYSFGFEI KDKKCDVPCIGIEMVHDGGKETW HSAATAIYCLMGSGQLLWDTV  
TGVDMAL

**B-PH13-WT**

**B-Yamagata B/Phuket/3073/2013**

PEPEWTPRLSCLPGSTFQKALLISPHRFGETKGNAPLI IREPFACGPKECKHFALTHYAAQP  
GGYYNGTREDNRNKLRLHLSVVKLGKIPTVENSIFHMAAWSGSACHDGREWTYIGVDGPDSNALLK  
IKYGEAYTDYHSYAKNILRTQESACNCIGGDCYLMI TDGPASGISECRFLKIREGRI I KEIFP  
TGRVKHTEECTCGFASNKTIECACRDNSYAKRPFVVKLVNVEDTAEIRLMCTKTYLDTPRPNDG  
SITGPCESDGDEGSGGIKGGFVHQRMASKIGRWYSRTMSKTKRMGMGLYVKYDGPWTDSEALA  
LSGVMVSMEEPGWYSFGFEIKDKKCDVPCIGIEMVHDGGKTTWHSATAIYCLMGSGQLLWDTV  
TGVNMTL

**N9-AN13-Y170H**

**H7N9 A/Anhui/1/2013**

NFNNTLTKGLCTINSWHIYGKDNAVRIGESSDVLVTREPYVSCDPDECRFYALSQGTTRGKHSN  
GTIHDRSQYRALISWPLSSPPTVHNSRVEICIGWSSTSCHDGGKSRMSICISGPNNNASAVVWYNR  
RPVAEINTWARNILRTQESECVCHNGVCPVVFVDGSAATGPADTRIYYFKEGKILKWESLTGTAK  
HIEECSCYGERGTGITCTCRDNWQGSNRPIQIDPVAMTHTSQYICSPVLTDNPRPNDPNIGKCN  
DPYPGNNGVKGFSYLDGANTWLGRTISTASRSGYEMLKVPNALTDDRSPKIQGQTIVLNADW  
SGYSGSFMDYWAEGDCYRACFYVELIRGRPKEDKVVWTSNSIVSMCSSTEFLGQWNWPDGAKIE  
YFL

**N1-CA09-WT + Stalk**

**H1N1 A/California/07/2009**

SHSIQLGNQNQIETCNQSVITYENNTWVNQTYVNI SNTNFAAGQSVVSVKLAGNSSLCPVSGWA  
IYSKDNSVRIGSKGDVFIREFPISCSPLECRTFFLTQGALLNDKHSNGTIKDRSPYRTLMSCP  
IGEVPSPYNSRFESVAWSASACHDGINWLTIGISGPDNGAVAVLKYNGIITDTIKSWRNNILRT  
QESECACVNGSCFTVMTDGPNSGQASYKIFRIEKGKIVKSVEMNAPNYHYEECSYCPDSSEITC  
VCRDNWHGNSRNPWVSFNQNLQYQIGYICSGIFGDNPRPNDKTGSCGPVSSNGANGVKGFSYKYG  
NGVWIGRTKSISSRNGFEMIWDPNGWTGTDNNFSIKQDIVGINEWSGYSGSFVQHPPELTGLDCI  
RPCFWVELIRGRPKENTIWTSGSSISFCGVNSDTVGSWPDGAELPFTIDK

**N1-CA09-sNAp-94**

**H1N1 A/California/07/2009**

VKLAGNSSLCPVSGWAPLSKDNSVRIGSKGEVFIREFPISCSPLECRTFFLTQGALLNDKHSN  
GTIKDRSPYRTLMSCPIGSVSPSNSRFESVAWSASACHDGINWLTIGITGPDNGAVAILKYNG  
IITDTIKSWRNNILRTQESECACVNGSCFTVMTDGPNSGQASYKIFRIEKGKIVKSVEMNAPNY  
HYEECSYCPDSSEITCVCRDNWHGNSRNPWVSFNQNLQYQIGYICSGIFGDNPRPNDKTGSCGPV  
SSNGANGVKGFSFKYGNVWIGRTKSISSRNGFEMIWDPNGWTGTDNNFSIKQDIVGINEWSGY  
SGSFVMHPPELTGLDCIVPCFWVELIRGRPKENTIWTSGSSISFCGVNSDTTGSWPDGAELPFT  
IDK

**N1-CA09-sNAp-114**

**H1N1 A/California/07/2009**

VKLAGNSSLCPVSGWAPLSKDNSVRIGSKGEVFIREFPISCSPLECRTFFLTQGALLNDKHSN  
GTIKDRSPYRTLMSCPIGSVSPSNSRFESIAWSASACHDGINWLTIGITGPDNGAVAILKYNG  
IITDTIKSWRNNILRTQESECACVNGSCFTVMTDGPNSGQASYKIFRIEKGKIVKSVEMNAPNY

HYEESCYPDSSEITCVCRDNWHGSRNPVVSFNQNLEYQIGYICSGIFGDNPRPNDKTGSCGPV  
SSNGANGVKGFSFKYGNVWIGRTKSISSRNGFEMIWDPNGWGTGTDNNFSIKQDIVGINEWSGY  
SGSFVMHPELTGLDCIVPCFWVELIRGRP KENTIWTSGSSISFCGVNSDTTGWSWPDGAELPFT  
IDK

N1-CA09-sNAp-130

H1N1 A/California/07/2009

VKLAGNSSLCPVSGWAPLSKDNSVRIGSKGDV FVIREPFISCSPLECRTFFLTQGALLNDKHSN  
GTIKDRSPYRTLMSVPIGSVPSYNARFESIAWSASACHDGINWLTIGITGPDNGAVAILKYNG  
IITDTIKSWRNNILRTQESEACVNGSCFTVMTDGP SNGQASYKIFRIEKGKIVKSVEMNAPNY  
HYEESCYPDSSEITCVCRDNWHGSRNPVVSFNQNLEYQIGYICSGIFGDNPRPNDKTGSCGPV  
SSNGANGVKGFSFKYGNVWIGRTKSISSRNGFEMIWDPNGWGTGTDNNFSIKQDIVGINEWSGY  
SGSFVMHPELTGLDCIVPCFWVELIRGRP KENTIWTSGSSISFCGVNSDTTGWSWPDGAELPFT  
IDK

N1-CA09-sNAp-155

H1N1 A/California/07/2009

VKLAGNSSLCPVSGWAPLSKDNSVRIGSKGDV FVIREPFISCSPLECRTFFLTQGALLNDKHSN  
GTIKDRSPYRTLMSVPIGSVPSYNARFESIAWSASACHDGINWLTIGITGPDNGAVAILKYNG  
IITDTIKSWRNNILRTQESEACVNGSCFTVMTDGP SNGQASYKIFRIEKGKIVKSVEMNAPNY  
HYEESCYPDSSEITCVCRDNWHGSRNPVVSFNQNLEYQIGYICSGIFGDNPRPNDKTGSCGPV  
SSNGANGVKGFSFKYGNVWIGRTKSISSRNGFEMIWDPNGWGTGTDNNFSIKQDIVGINEWSGY  
SGSFVMHPELTGLDCIVPCFWVELIRGRP KENTIWTSGSSISFCGVNSDTVGWSWPDGAELPFT  
IDK

N1-CA09-sNAp-131

H1N1 A/California/07/2009

VKLAGNSSLCPVSGWAPYSKDNSVRIGSKGDV FVIREPFISCSPLECRTFFLTQGALLNDKHSN  
GTIKDRSPYRTLMSVPIGSVPSYNARFESIAWSASACHDGINWLTIGITGPDNGAVAILKYNG  
IITDTIKSWRNNILRTQESEACVNGSCFTVMTDGP SNGQASYKIFRIEKGKIVKSVEMNAPNY  
HYEESCYPDSSEITCVCRDNWHGSRNPVVSFNQNLEYQIGYICSGIFGDNPRPNDKTGSCGPV  
SSNGANGVKGFSFKYGNVWIGRTKSISSRNGFEMIWDPNGWGTGTDNNFSIKQDIVGINEWSGY  
SGSFVQHPELTGLDCIRPCFWVELIRGRP KENTIWTSGSSISFCGVNSDTTGWSWPDGAELPFT  
IDK

N1-CA09-sNAp-134

H1N1 A/California/07/2009

VKLAGNSSLCPVSGWAPLSKDNSVRIGSKGDV FVIREPFISCSPLECRTFFLTQGALLNDKHSN  
GTIKDRSPYRTLMSVPIGEVPSYNARFESIAWSASACHDGINWLTIGITGPDNGAVAILKYNG  
IITDTIKSWRNNILRTQESEACVNGSCFTVMTDGP SNGQASYKIFRIEKGKIVKSVEMNAPNY  
HYEESCYPDSSEITCVCRDNWHGSRNPVVSFNQNLEYQIGYICSGIFGDNPRPNDKTGSCGPV  
SSNGANGVKGFSFKYGNVWIGRTKSISSRNGFEMIWDPNGWGTGTDNNFSIKQDIVGINEWSGY  
SGSFVMHPELTGLDCIVPCFWVELIRGRP KENTIWTSGSSISFCGVNSDTVGWSWPDGAELPFT  
IDK

N1-CA09-sNAp-130 + Stalk  
H1N1 A/California/07/2009

SHSIQLGNQNQIETCNQSVITYENNTWVNQTYVNI SNTNFAAGQSVVSVKLAGNSSLCPVSGWA  
PLSKDNSVRIGSKGDVVFVIREPFISCSPLECRTFFLTQGALLNDKHSNGTIKDRSPYRTLMSVP  
IGSVPSYPYNARFESIAWSASACHDGINWLTIGITGPDNGAVAILKYNGIITDTIKSWRNNILRT  
QESECACVNGSCFTVMTDGPSNGQASYKIFRIEKGKIVKSVEMNAPNYHYEECSYCPDSSEITC  
VCRDNWHGSNRPPWVSFNQNLLEYQIGYICSGIFGDNPRPNDKTGSCGPVSSNGANGVKGF SFKYG  
NGVWIGRTKSISSRNGFEMIWDPNGWTGTDNNFSIKQDIVGINESGYSGSFVMHPELTGLDCI  
VPCFWVELIRGRPKENTIWTSGSSISFCGVNSD'TTGWSWPDGAELPFTIDK

N8-JD13-sNAp-282  
H10N8 A/Jiangxi-Donghu/346-2/2013

HFMNNTREALCDAKGFAPFSKDNIGIRIGSRGHVVFVIREPFVSCSPTECRTFFLTQGSLLNDKHSN  
GTVKDRSPYRTLMSVEIGSSPNVYQARFEAVAWSATA CHDGKKWMTIGVTGPDAKAVAVVHYGG  
IPTDVINSWAGDILRTQESSCTCIQGE CFWVMTDGPANRQAQYRAFKAKQGGKIVGQAEISFNNG  
HIEECSCYPNEGKVECVCKDNWTGTNRPVLVISPDLSYRVGYLCAGLPDTPRGEDSQFTGSCT  
SPMGNQGYGVKGFGRQGNVWVGRTISRSTRSGFEILKVRNGWVQNSKEQIKRQVVVDNLNWS  
GYSGSFTLPAELTKRNCLVPCFWVEMIRGNPEEKT IWTSSSSIVMCGVDHEIADWSWHDGAILP  
FDIDKM

N8-JD13-sNAp-285  
H10N8 A/Jiangxi-Donghu/346-2/2013

HFMNNTREALCDAKGFAPFSKDNIGIRIGSRGHVVFVIREPFVSCSPTECRTFFLTQGSLLNDKHSN  
GTVKDRSPYRTLMSVPIGSSPNVYQARFEAVAWSATA CHDGKKWMTIGVTGPDAKAVAVVHYGG  
IPTDVINSWAGDILRTQESSCTCIQGE CFWVMTDGPANRQAQYRAFKAKQGGKIVGQAEISFNNG  
HIEECSCYPNEGKVECVCKDNWTGTNRPVLVISPDLSYRVGYLCAGLPDTPRGEDSQFTGSCT  
SPMGNQGYGVKGFGRQGNVWVGRTISRSTRSGFEILKVRNGWVQNSKEQIKRQVVVDNLNWS  
GYSGSFTLPAELTKRNCLVPCFWVEMIRGNPEEKT IWTSSSSIVMCGVDHEIADWSWHDGAILP  
FDIDKM

N2-WI05-desNAp-156  
H3N2 A/Wisconsin/67/2005

EYRNWSKPQCNI TGFAPFSKDNSIRLSAGGDIWVTREPYVSCDPDKCYQFALGQGTTLNNVHSN  
DTVHDRTPYRTLLMNELGEPFHLGTKQVCIAWSSSSCHDGKAWLHVCVGTGDDKNATASF IYNGR  
LVDSIVSWSKEILRTQESECVCINGTCTVVM TDGSASGKADTKILFIEEGKIVHTSTLSGSAQH  
VEECSCYPRYLGVRVCVCRDNWKGSNRP IVDINIKDYSIVSSYVCSGLVGDTPRKNDS SSSSHCL  
DPNNEEGGHGVKGWAFDDGNDVWVGRTISEKLRSGYETFKVIEGWSNPNSKLQINRQVIVDRGN  
RSGYSGIFSVGKSCINRCFYVELIRGRKEETEVLWTSNSIVVFCGTSGT YGTGSWPDGADINL  
MPI

N2-WI05-desNAp-157  
H3N2 A/Wisconsin/67/2005

EYRNWSKPQCNI TGFAPFSKDNSIRLSAGGDIWVTREPYVSCDPDKCYQFALGQGTTLNNVHSN  
DTVHDRTPYRTLLMNELGVPFHLGTKQVCIAWSSSSCHDGKAWLHVCVSGDDKNATASF IYNGR  
LVDSIVSWSKEILRTQESECVCINGTCTVVM TDGSASGKADTKILFIEEGKIVHTSTLSGSAQH

VEECSCYPRYLGVRCVCRDNWKGSNRP IVDINIKDYSIVSSYVCSGLVGDTPRKNDS SSSSSHCL  
DPNNEEGGHGVKGWAFDDGNDVWMGRTISEKLRSGYETFKVI EGWSNPNSK LQINRQVI VDRGN  
RSGYSGIFSVEGKSCINRCFYVELIRGRKEETEVLWTSNSIVVFCGTS GTYGTGSWPDGADINL  
MPI

N2-WI05-desNAp-158

H3N2 A/Wisconsin/67/2005

EYRNWSKPQCNI TGF AIFSKDNSIRLSAGGDIWVTREPYVSCDPDKCYQFALGQGTTLNNVHSN  
DTVHDRTPYRTL LLMNELGVPFHLGTKQVCVAWSSSSSCHD GKAWLHVCVSGDDKNATASFIYNGR  
LVDSIVSWSKEILRTQESECV CINGTCTVVM TDGSASGKADTKILFIEEGKIVHTSTLSGSAQH  
VEECSCYPRYLGVRCVCRDNWKGSNRP IVDINIKDYSIVSSYVCSGLVGDTPRKNDS SSSSSHCL  
DPNNEEGGHGVKGWAFDDGNDVWMGRTISEKLRSGYETFKVI EGWSNPNSK LQINRQVI VDRGN  
RSGYSGIFSVEGKSCINRCFYVELIRGRKEETEVLWTSNSIVVFCGTS GTYGTGSWPDGADINL  
MPI

N2-WI05-desNAp-249

H3N2 A/Wisconsin/67/2005

EYRNWSKPQCNI TGF APFSKDNSIRLSAGGDIWVTREPYVSCDPDKCYQFALGQGTTLNNVHSN  
DTVHDRTPYRTL LLMNELGQPFHLGTKQVCIAWSSSSSCHD GKAWLHVCVTGDDKNATASFIYNGR  
LVDSIVSWSKEILRTQESECV CINGTCTVVM TDGSASGKADTKILFIEEGKIVHTSTLSGSAQH  
VEECSCYPRYLGVRCVCRDNWKGSNRP IVDINIKDYSIVSSYVCSGLVGDTPRKNDS SSSSSHCL  
DPNNEEGGHGVKGWAFDDGNDVWMGRTISEKLRSGYETFKVI EGWSNPNSK LQINRQVI VDRGN  
RSGYSGIFSVEGKSCINRCFYVELIRGRKEETEVLWTSNSIVVFCGTS GTYGTGSWPDGADINL  
MP

N2-WI05-desNAp-255

H3N2 A/Wisconsin/67/2005

EYRNWSKPQCNI TGF APFSKDNSIRLSAGGDIWVTREPYVSCDPDKCYQFALGQGTTLNNVHSN  
DTVHDRTPYRTL LLMNELGQPFHLGTKQVCVAWSSSSSCHD GKAWLHVCVSGDDKNATASFIYNGR  
LVDSIVSWSKEILRTQESECV CINGTCTVVM TDGSASGKADTKILFIEEGKIVHTSTLSGSAQH  
VEECSCYPRYLGVRCVCRDNWKGSNRP IVDINIKDYSIVSSYVCSGLVGDTPRKNDS SSSSSHCL  
DPNNEEGGHGVKGWAFDDGNDVWMGRTISEKLRSGYETFKVI EGWSNPNSK LQINRQVI VDRGN  
RSGYSGIFSVEGKSCINRCFYVELIRGRKEETEVLWTSNSIVVFCGTS GTYGTGSWPDGADINL  
MPI

N1-MI15-sNAp-155

VKLAGNSSLCPVSGWAPLSKDNSVRIGSKGDV FVIREPFISCSPLECRTFFLTQGALLNDKHSN  
GTIKDRSPYRTLMSVPIGSPVSPYNARFESIAWSASACHDGINWLTIGITGPD SGAVAILKYNG  
IITDTIKSWRNNILRTQESECACVNGSCFTIMTDG PSDGQASYKIFRIEKGKIIKSVEMKAPNY  
HYEECSYPDSSEITCVCRDNWHGSNRPWVSFNQNLEYQMGYICSGVFGDNPRPNDKTGSCGPV  
SSNGANGVKGFSFKYGNVWIGRTKSISSRKG FEMIWDPNGWGTGDNKFSIKQDIVGINEWSGY  
SGSFVMHPELTGLDCIVPCFWVELIRGRPEENTIWTSGSSISFCGVNSD TVGWSWPDGAELPFT  
IDK



N1-MI15-sNAp-174

H1N1 A/Michigan/45/2015

VKLAGNSSLCPVSGWAPLSKDNSVRIGSKGDV FVIREPFISCSPLECRQFFLTQGALLNDKHSN  
GTIKDRSPYRTLMSVPIGSPVSPYNARFESIAWSASACHDGINWLTIGITGPD SGAVAILKYNG  
IITDTIKSWRNNILRTQESEACVNGSCFTIMTDG PSDGQASYKIFRIEKGKIIKSVEMKAPNY  
HYEECS CYPDSSEITCVCRDNWHG SNRPWVSFNQNLEYQMGYICSGVFGDNPRPNDKTGSCGPV  
SSNGANGVKGF SFKYNGVWIGRTKSISSRKG FEMIWD PNGWTGTDNKFSIKQDIVGINEWSGY  
SGSFVMHPELTGLDCIVPCFWVELIRGRPEENTIWTSGSSISFCGVNSDTV GWSWPDGAELPFT  
IDK

N1-MI15-sNAp-165

H1N1 A/Michigan/45/2015

VKLAGNSSLCPVSGWAPLSKDNSVRIGSKGDI FVIREPFISCSPLECRTFFLTQGALLNDKHSN  
GTIKDRSPYRTLMSVPIGSPVSPYNARFESIAWSASACHDGINWLTIGITG PD SGAVAILKYNG  
IITDTIKSWRNNILRTQESEACVNGSCFTIMTDG PSDGQASYKIFRIEKGKIIKSVEMKAPNY  
HYEECS CYPDSSEITCVCRDNWHG SNRPWVSFNQNLEYQMGYICSGVFGDNPRPNDKTGSCGPV  
SSNGANGVKGF SFKYNGVWIGRTKSISSRKG FEMIWD PNGWTGTDNKFSIKQDIVGINEWSGY  
SGSFVMHPELTGLDCIVPCFWVELIRGRPEENTIWTSGSSISFCGVNSDTV GWSWPDGAELPFT  
IDK

N1-MI15-sNAp-176

H1N1 A/Michigan/45/2015

VKLAGNSSLCPVSGWAPLSKDNSVRIGSKGDI FVIREPFISCSPLECRQFFLTQGALLNDKHSN  
GTIKDRSPYRTLMSVPIGSPVSPYNARFESIAWSASACHDGINWLTIGITG PD SGAVAILKYNG  
IITDTIKSWRNNILRTQESEACVNGSCFTIMTDG PSDGQASYKIFRIEKGKIIKSVEMKAPNY  
HYEECS CYPDSSEITCVCRDNWHG SNRPWVSFNQNLEYQMGYICSGVFGDNPRPNDKTGSCGPV  
SSNGANGVKGF SFKYNGVWIGRTKSISSRKG FEMIWD PNGWTGTDNKFSIKQDIVGINEWSGY  
SGSFVMHPELTGLDCIVPCFWVELIRGRPEENTIWTSGSSISFCGVNSDTV GWSWPDGAELPFT  
IDK

N1-MI15-sNAp-183

H1N1 A/Michigan/45/2015

VKLAGNSSLCPVSGWAPLAKDNSVRIGSKGDV FVIREPFISCSPLECRMFFLTQGALLNDKHSN  
GTIKDRSPYRTLMSVPLGSPVSPYNARFESIAWSASACHDGINWLTIGITG PD SGAVAILKYNG  
IITDTIKSWRNNILRTQESEACVNGSCFTIMTDG PSDGQASYKIFRIEKGKIIKSVEMKAPNY  
HYEECS CYPDSSEITCVCRDNWHG SNRPWVSFNQNLEYQMGYICSGVFGDNPRPNDKTGSCGPV  
SSNGANGVKGF SFKYNGVWIGRTKSISSRKG FEMIWD PNGWTGTDNKFSIKQDIVGINEWSGY  
SGSFVMHPELTGLDCIVPCFWVELIRGRPEENTIWTSGSIIAF CGVNSDTV GWSWPDGAELPFT  
IDK

N1-VN04-sNAp-155

H5N1 A/Vietnam/1203/2004

VKLAGNSSLCPINGWAPLSKDNSIRIGSKGDV FVIREPFISCSHLECRTFFLTQGALLNDKHSN  
GTVKDRSPHRTLMSVPVGSAPSPYNARFESIAWSASACHDGT SWLTIGITGPDNGAVAILKYNG

IITDTIKSWRNNILRTQESEACVNGSCFTVMTDGPNSGQASYKIFKMEKGKVVKSVELDAPNY  
HYEECSYPNAGEITCVCRDNWHGNSRNPWVSFNQNLEYQIGYICSGVFGDNPRPNDGTGSCGPV  
SSNGAYGVKGFSEFKYNGVWIGRTKSTNSRSGFEMIWDPNGWETDSSFSVKQDIVAITDWSGY  
SGSFVMHPELTGLDCIVPCFWVELIRGRPKESTIWTSGSSISFCGVNSDTVGWSWPDGAELPFT  
IDK

**N1-VN04-sNAp-354**

**H5N1 A/Vietnam/1203/2004**

VKLAGNSSLCPIGWAPLSKDNSVRIGSKGDVFIREFPFI SC SHLECRQFFLTQGALLNDKHSN  
GTVKDRSPHRTLMSVPIGSVPSYPNARFESIAWSASACHDGT SWLTIGITGPDNGAVAILKYNG  
IITDTIKSWRNNILRTQESEACVNGSCFTVMTDGPNSGQASYKIFKMEKGKVVKSVELDAPNY  
HYEECSYPNAGEITCVCRDNWHGNSRNPWVSFNQNLEYQIGYICSGVFGDNPRPNDGTGSCGPV  
SSNGAYGVKGFSEFKYNGVWIGRTKSTNSRSGFEMIWDPNGWETDSSFSVKQDIVAITDWSGY  
SGSFVMHPELTGLDCIVPCFWVELIRGRPKESTIWTSGSSISFCGVNSDTVGWSWPDGAELPFT  
IDK

**N1-WSN33-sNAp-155**

**H1N1 A/WSN/1933**

VILTGNSSLCPIRGWAPLSKDNGIRIGSKGDVFIREFPFI SC SHLECR TFFLTQGALLNDKHSR  
GTFKDRSPYRALMSVPVGSAPSYPNARFESIAWSASACHDGMGWL TIGITGPDDGAVAILKYNR  
IITETIKSWRKNILRTQESECTCVNGSCFTIMTDGSPDGLASYKIFKIEKGKVTKSIELNAPNS  
HYEECSYPDTGKVMCVCRDNWHGNSRNPWVSFDQNLDYKIGYICSGVFGDNPRPKDGTGSCGPV  
SADGANGVKGFSEFKYNGVWIGRTKSDSSRHGFEMIWDPNGWETD SRF SMRQDVVAITNRSY  
SGSFVMHPELTGLDCMVPCFWVELIRGLPEEDAIWTSGSII SFCGVNSDTVDWSWPDGAELPFT  
IDK

**N1-WSN33-sNAp-366**

**H1N1 A/WSN/1933**

VILTGNSSLCPIRGWAPLSKDNSVRIGSKGDVFIREFPFI SC SHLECR TFFLTQGALLNDKHSR  
GTFKDRSPYRTLMSVPIGSVPSYPNARFESIAWSASACHDGMGWL TIGITGPDDGAVAILKYNG  
IITETIKSWRKNILRTQESECTCVNGSCFTIMTDGSPDGLASYKIFKIEKGKVTKSIELNAPNS  
HYEECSYPDTGKVMCVCRDNWHGNSRNPWVSFDQNLDYKIGYICSGVFGDNPRPKDGTGSCGPV  
SADGANGVKGFSEFKYNGVWIGRTKSDSSRHGFEMIWDPNGWETD SRF SMRQDVVAITNRSY  
SGSFVMHPELTGLDCMVPCFWVELIRGLPEEDAIWTSGSII SFCGVNSDTVDWSWPDGAELPFT  
IDK

**N1-WSN33-sNAp-367**

**H1N1 A/WSN/1933**

VILTGNSSLCPIRGWAPLSKDNSVRIGSKGDVFIREFPFI SC SHLECRQFFLTQGALLNDKHSR  
GTFKDRSPYRTLMSVPIGSVPSYPNARFESIAWSASACHDGMGWL TIGITGPDDGAVAILKYNG  
IITETIKSWRKNILRTQESECTCVNGSCFTIMTDGSPDGLASYKIFKIEKGKVTKSIELNAPNS  
HYEECSYPDTGKVMCVCRDNWHGNSRNPWVSFDQNLDYKIGYICSGVFGDNPRPKDGTGSCGPV  
SADGANGVKGFSEFKYNGVWIGRTKSDSSRHGFEMIWDPNGWETD SRF SMRQDVVAITNRSY  
SGSFVMHPELTGLDCMVPCFWVELIRGLPEEDAIWTSGSII SFCGVNSDTVDWSWPDGAELPFT  
IDK

N1-WSN33-sNAp-375

H1N1 A/WSN/1933

VILTGNSSLCPIRGWAPLAKDNSVRIGSKGDV FVIREPFISCSHLECRMFFLTQGALLNDKHSR  
GTFKDRSPYRTLMSVPLGSPVPSPYNARFESIAWSASACHDGMGWLTI GITGPDDGAVAILKYNG  
IITETIKSWRKNILRTQESECTCVNGSCFTIMTDGPSDGLASYKIFKIEKGKVTKSIELNAPNS  
HYEECSYCPDTGKVMCVCRDNWHGSRNPWVSFDQNL DYKIGYICSGVFGDNPRPKDGTGSCGPV  
SADGANGVKGF SYKYGNVWIGRTKSDSSRHGFEMIWD PNGWTETDSRFSMRQDVVAITNRSY  
SGSFVMHPELTGLDCMVPCFWVELIRGLPEEDAIWTS GSI IAFCGVNSDTVDWSWPDGAELPFT  
IDK

N1-WSN33-sNAp-378

H1N1 A/WSN/1933

VILTGNSSLCPIRGWAPLAKDNSVRIGSKGDV FVIREPFISCSPLECRMFFLTQGALLNDKHSR  
GTFKDRSPYRTLMSVPLGSPVPSPYNARFESIAWSASACHDGMGWLTI GITGPDDGAVAILKYNG  
IITETIKSWRKNILRTQESEACVNGSCFTVMTDGPSDGLASYKIFKIEKGKITKSIEMNAPNS  
HYEECSYCPDTGKVMCVCRDNWHGSRNPWVSFDQNL DYKIGYICSGVFGDNPRPKDGTGSCGPV  
SADGANGVKGF SFKYGNVWIGRTKSDSSRHGFEMIWD PNGWTETDSRFSMRQDIVAITNRSY  
SGSFVMHPELTGLDCIVPCFWVELIRGLPEEDAIWTS GSI IAFCGVNSDTVDWSWPDGAELPFT  
IDK

N1-CA09-sNAp-155-T466A

H1N1 A/California/07/2009

VKLAGNSSLCPVSGWAPLSKD NSVRIGSKGDV FVIREPFISCSPLECRTFFLTQGALLNDKHSN  
GTIKDRSPYRTLMSVPIGSPVPSPYNARFESIAWSASACHDGINWLTIGITGPDNGAVAILKYNG  
IITDTIKSWRNNILRTQESEACVNGSCFTVMTDGPSNGQASYKIFRIEKGKIVKSVEMNAPNY  
HYEECSYCPDSSEITCVCRDNWHGSRNPWVSFNQNLEYQIGYICSGIFGDNPRPNDKTGSCGPV  
SSNGANGVKGF SFKYGNVWIGRTKSISSRNGFEMIWD PNGWTGTDNNFSIKQDIVGINEWSY  
SGSFVMHPELTGLDCIVPCFWVELIRGRPKENTIWTS GSSISFCGVNSDTVGWSWPDGAELPFA  
IDK

All membrane-anchored NA constructs shown below were tested without any added sequence features:

N1-CA09-WT full-length with C-terminal myc tag

H1N1 A/California/07/2009

MNPNQKIITIGSVCMTIGMANLILQIGNIISIWISHSIQLGNQNQIETCNQSVITYENNTWVNQ  
TYVNI SNTNFAAGQSVVSVKLAGNSSLCPVSGWAIYSKDNSVRIGSKGDV FVIREPFISCSPLE  
CRTFFLTQGALLNDKHSNGTIKDRSPYRTLMSCPIGEVPSPYNSRFESVAWSASACHDGINWLT  
IGISGPDNGAVAVLKYNGIITDTIKSWRNNILRTQESEECACVNGSCFTVMTDGP SNGQASYKIF  
RIEKGKIVKSVEMNAPNYHYEECSYPDSSEITCVCRDNWHGNSRNPWVSFNQNLEYQIGYICSG  
IFGDNPRPNDKTGSCGPVSSNGANGVKGF SYKYGNVWIGRTKSISSRNGFEMIWD PNGWTGTD  
NNFSIKQDIVGINEWSGYSGSFVQHP ELTGLDCIRPCFWVELIRGRP KENTIWTSGSSISFCGV  
NSDTVGSWPDGAELPFTIDKGGSGSGGEQKLI SEEDL

N1-CA09-sNAp-130 full-length with C-terminal myc tag

H1N1 A/California/07/2009

MNPNQKIITIGSVCMTIGMANLILQIGNIISIWISHSIQLGNQNQIETCNQSVITYENNTWVNQ  
TYVNI SNTNFAAGQSVVSVKLAGNSSLCPVSGWAPLSKDNSVRIGSKGDV FVIREPFISCSPLE  
CRTFFLTQGALLNDKHSNGTIKDRSPYRTLMSVPIGSVPSPYNARFESIAWSASACHDGINWLT  
IGITGPDNGAVAILKYNGIITDTIKSWRNNILRTQESEECACVNGSCFTVMTDGP SNGQASYKIF  
RIEKGKIVKSVEMNAPNYHYEECSYPDSSEITCVCRDNWHGNSRNPWVSFNQNLEYQIGYICSG  
IFGDNPRPNDKTGSCGPVSSNGANGVKGF SFKYGNVWIGRTKSISSRNGFEMIWD PNGWTGTD  
NNFSIKQDIVGINEWSGYSGSFVMHPELTGLDCIVPCFWVELIRGRP KENTIWTSGSSISFCGV  
NSDTTGWSWPDGAELPFTIDKGGSGSGGEQKLI SEEDL
