# Supplementary material for: Structure-based design of stabilized recombinant influenza neuraminidase tetramers
Source: PubMed Central journal article supplement (PMC8983682; doi:10.1038/s41467-022-29416-z), 2022-04-05
Supplement: 41467_2022_29416_MOESM4_ESM.pdf [file 41467_2022_29416_MOESM4_ESM.pdf]

# N1-CA09-WT

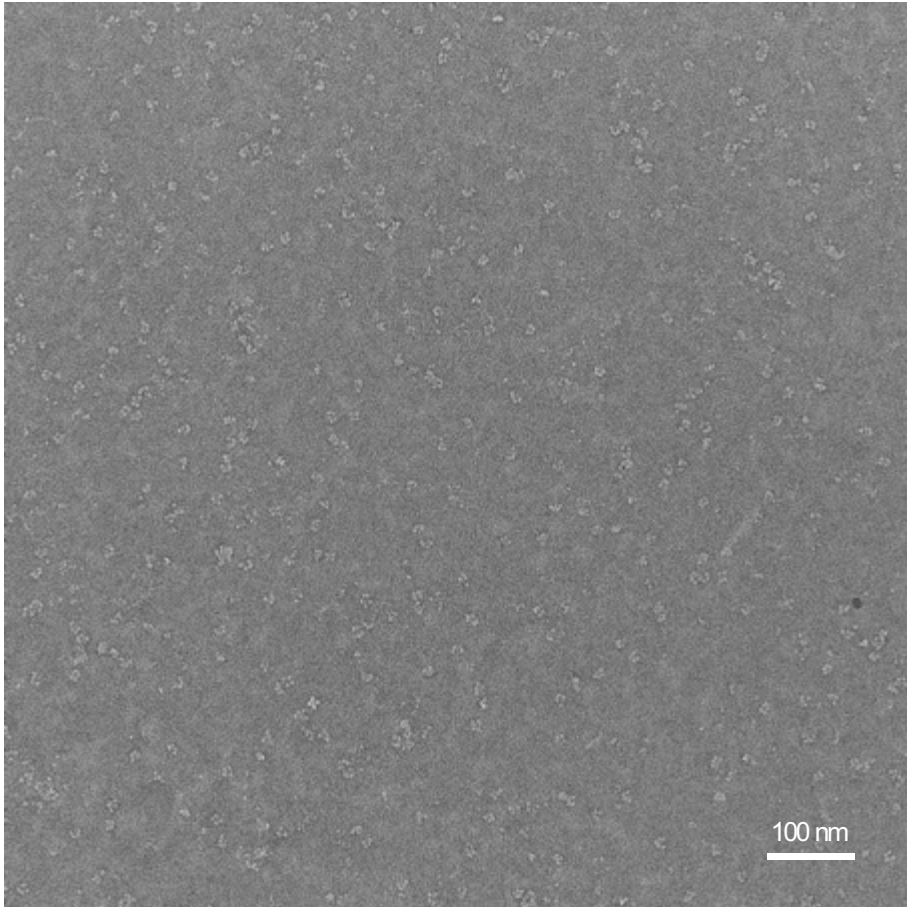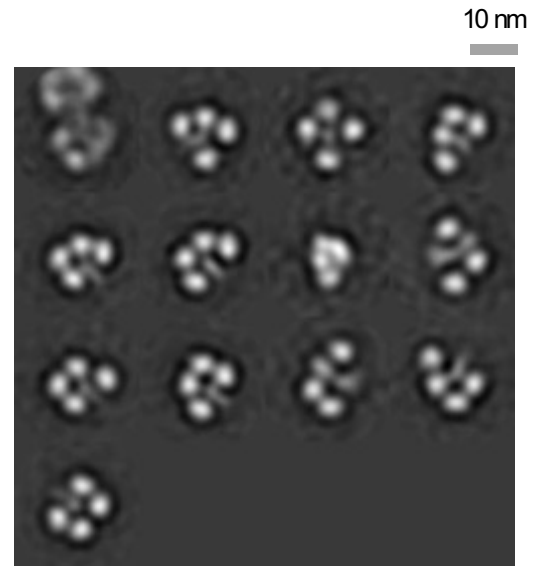

Total particles picked: 5271

Total particles clearly in closed state: 0

Total particles clearly in open state: 3974

# N1-MI15-WT

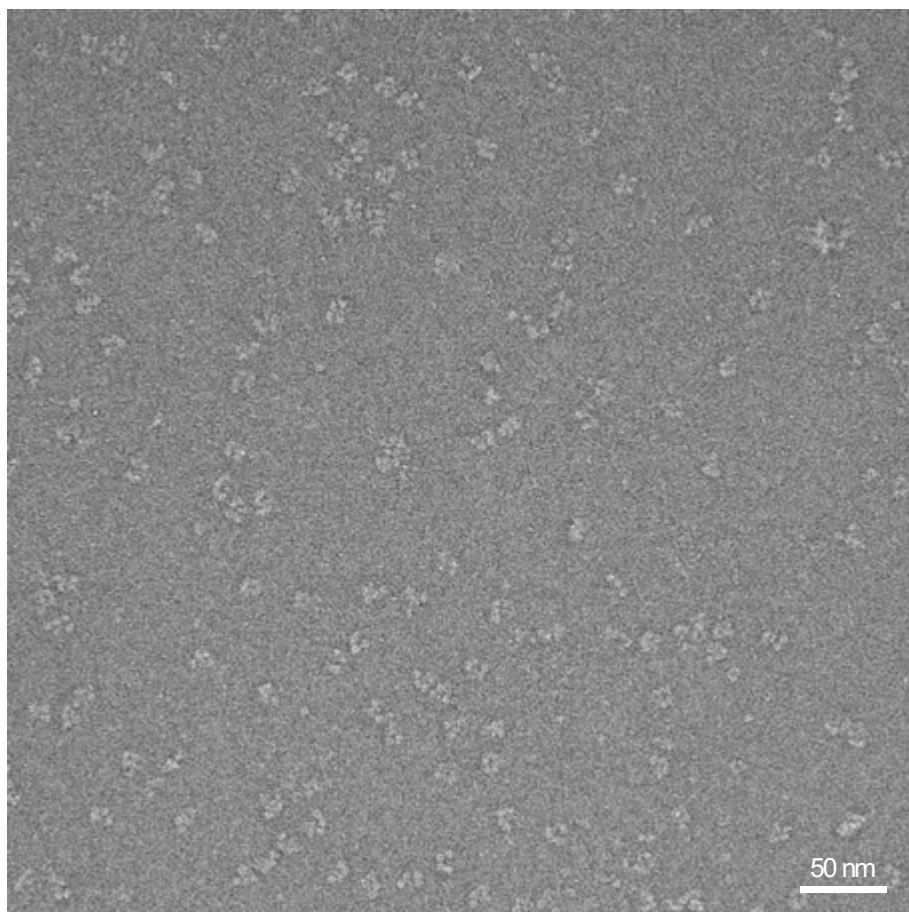

10 nm

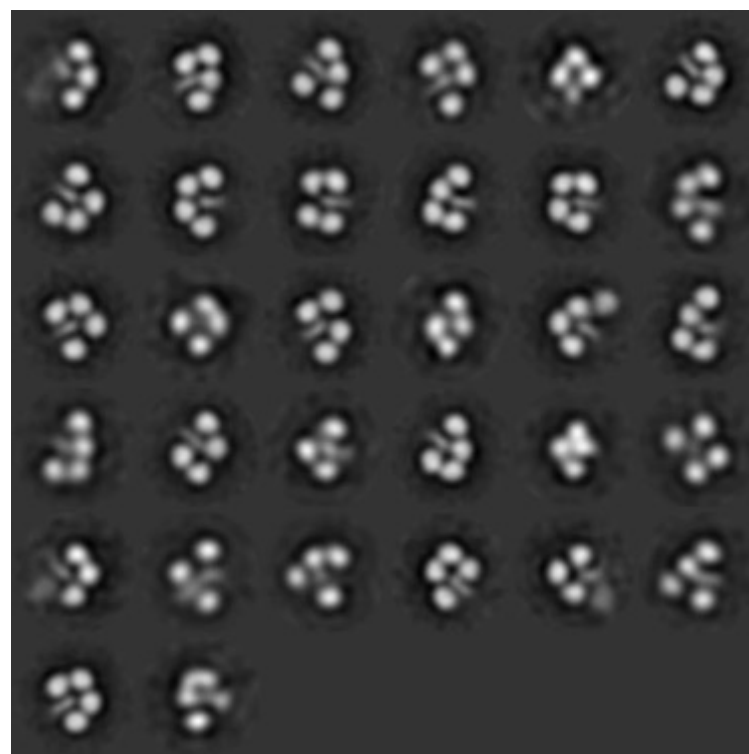

Total particles picked: 11230

Total particles clearly in closed state: 0

Total particles clearly in open state: 10076

# N1-NC99-WT

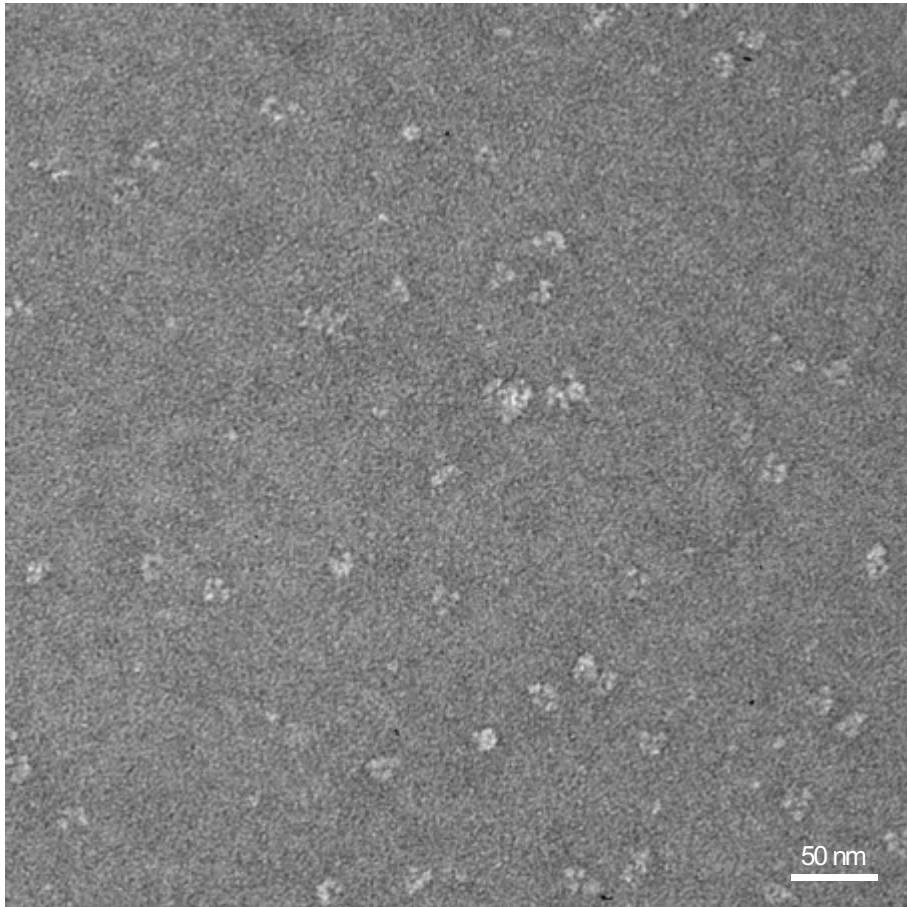

10 nm

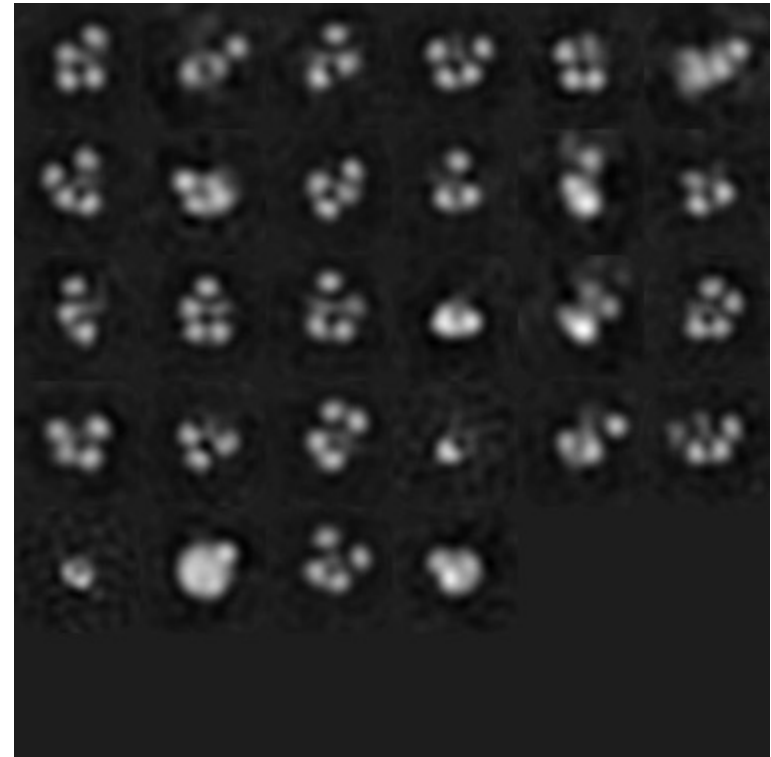

Total particles picked: 5273:

Total particles clearly in closed state: 101

Total particles clearly in open state: 3452

# N1-WSN33-WT

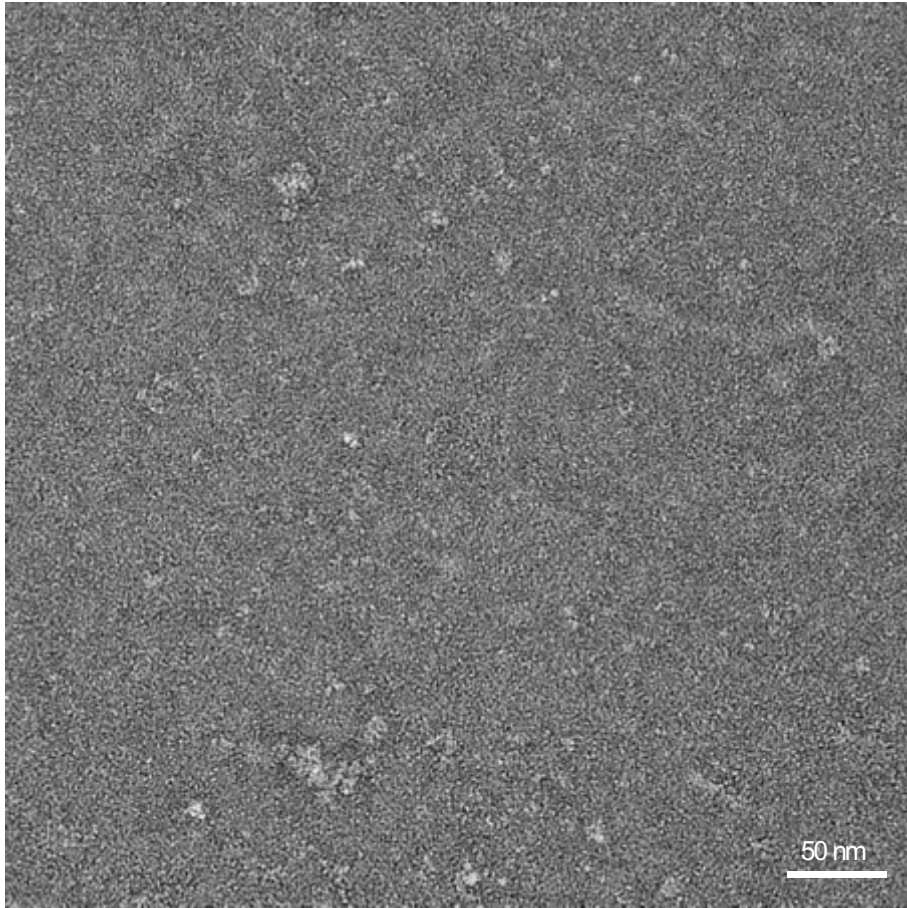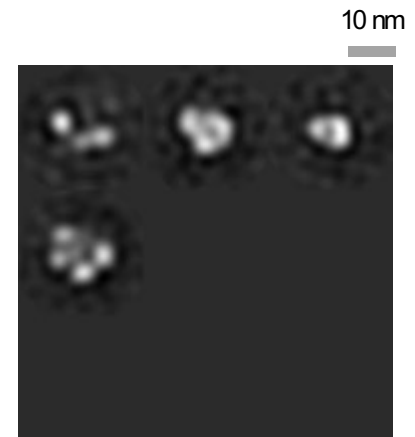

Total particles picked: 2320  
Total particles clearly in closed state: 0  
Total particles clearly in open state: 238

# N1-BV18-WT

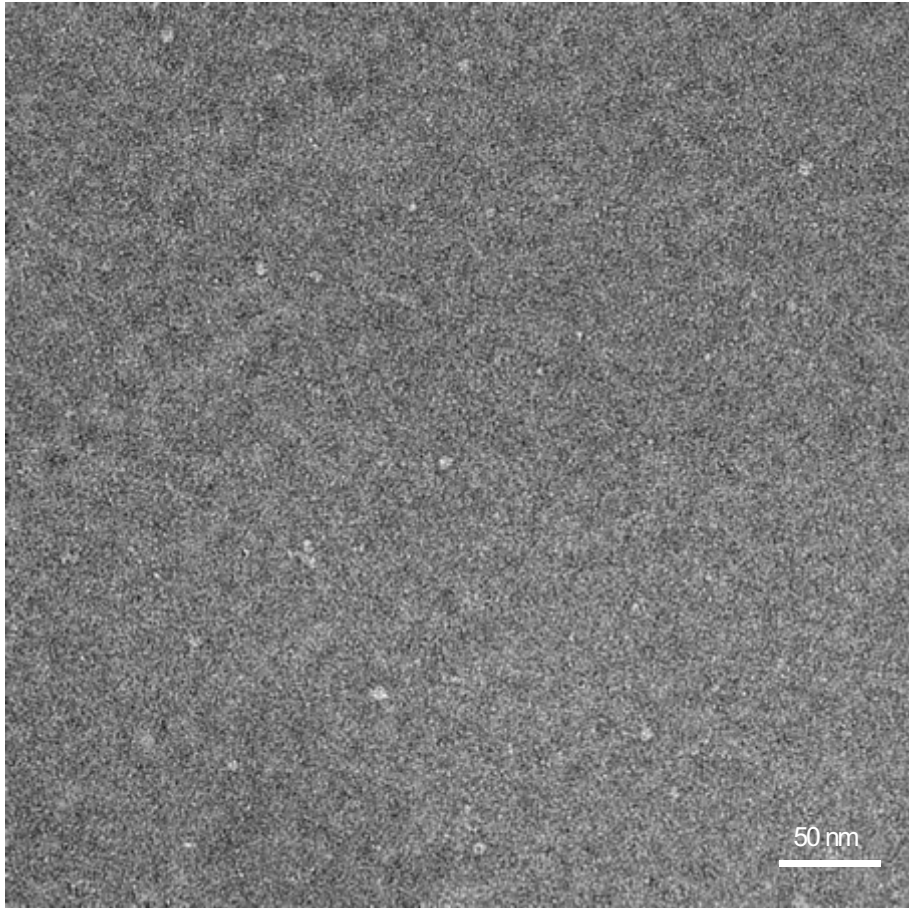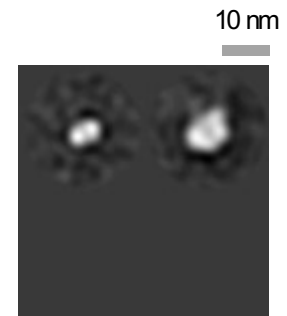

Total particles picked: 2281  
No clear tetramers observed to quantify

# N1-VN04-WT

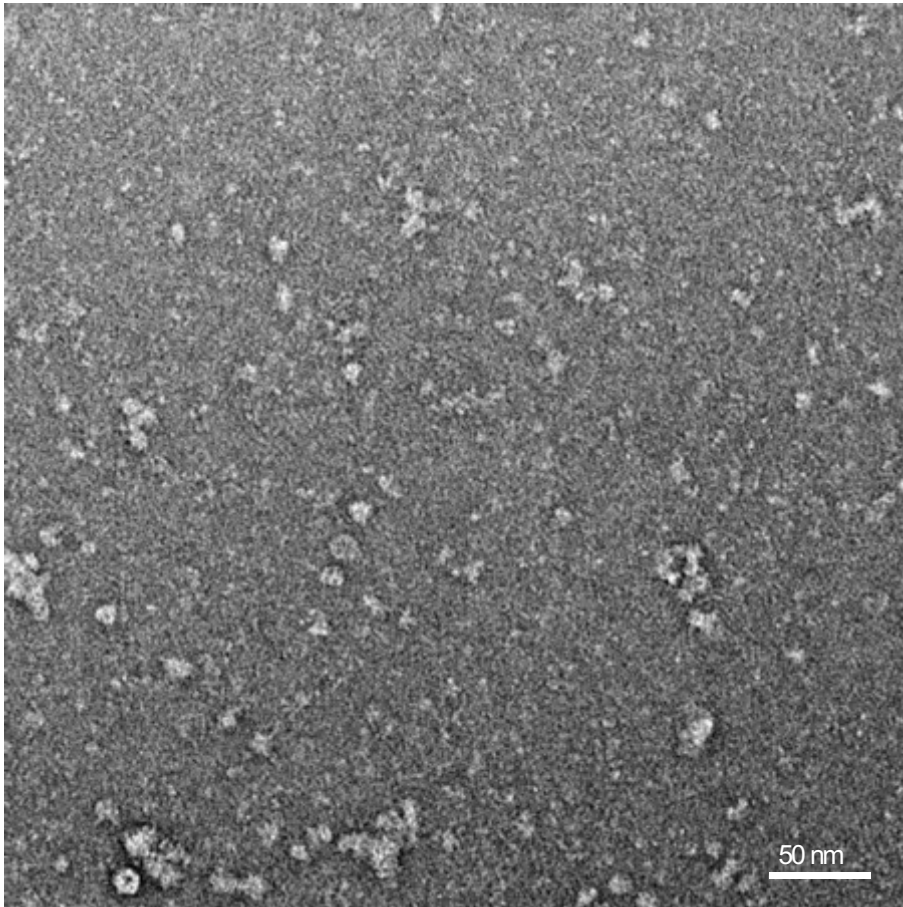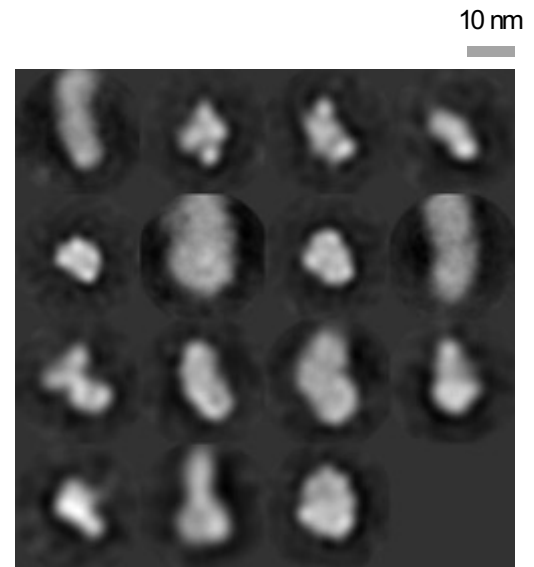

Total particles picked: 5722  
No clear tetramers observed to quantify

# N6-SI14-WT

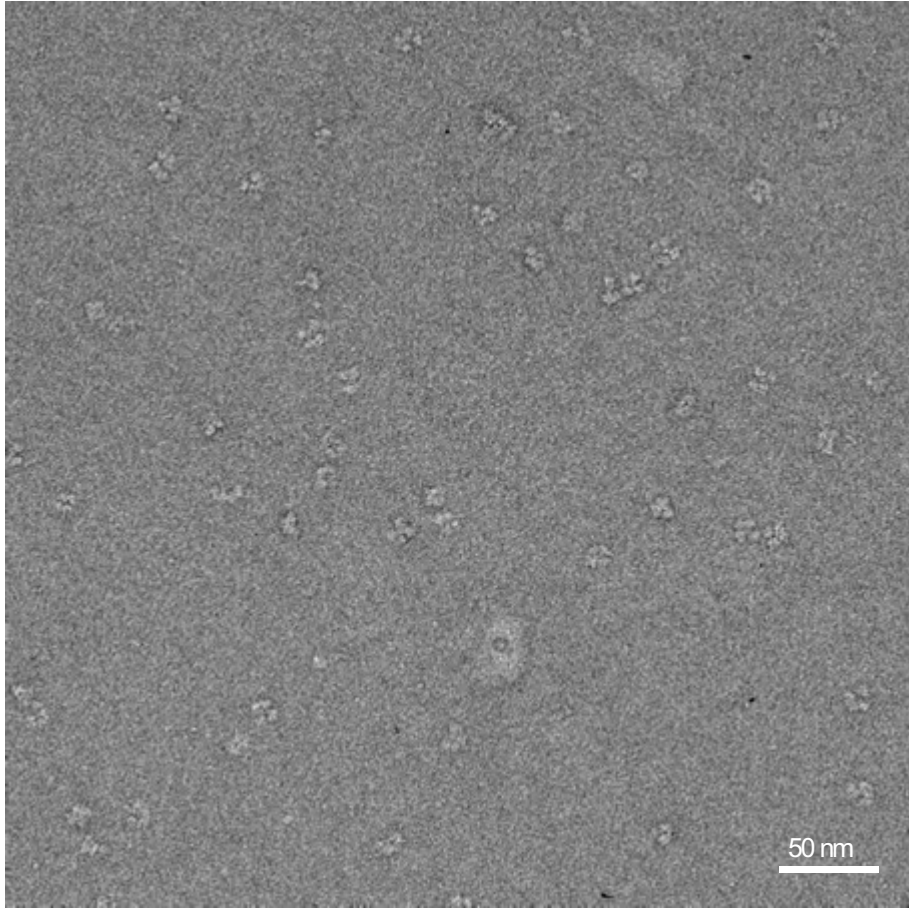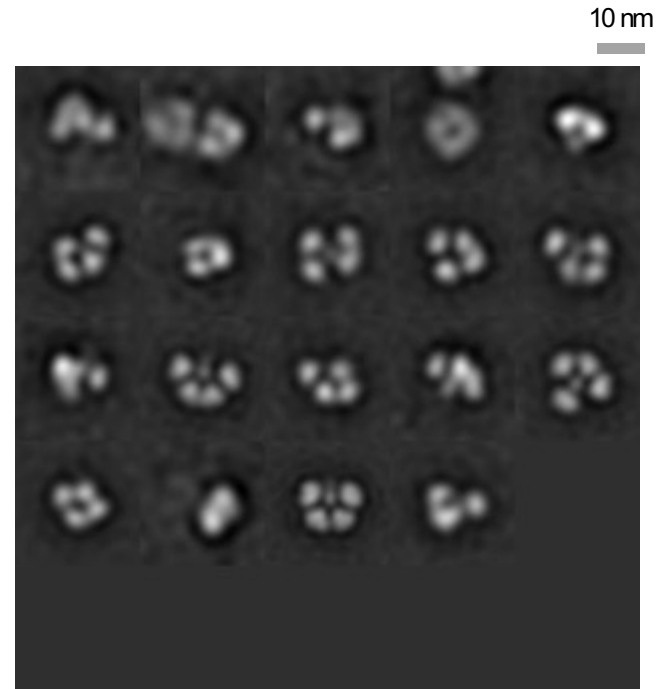

Total particles picked: 3306

Total particles clearly in closed state: 116

Total particles clearly in open state: 1708

# N2-MO99-WT

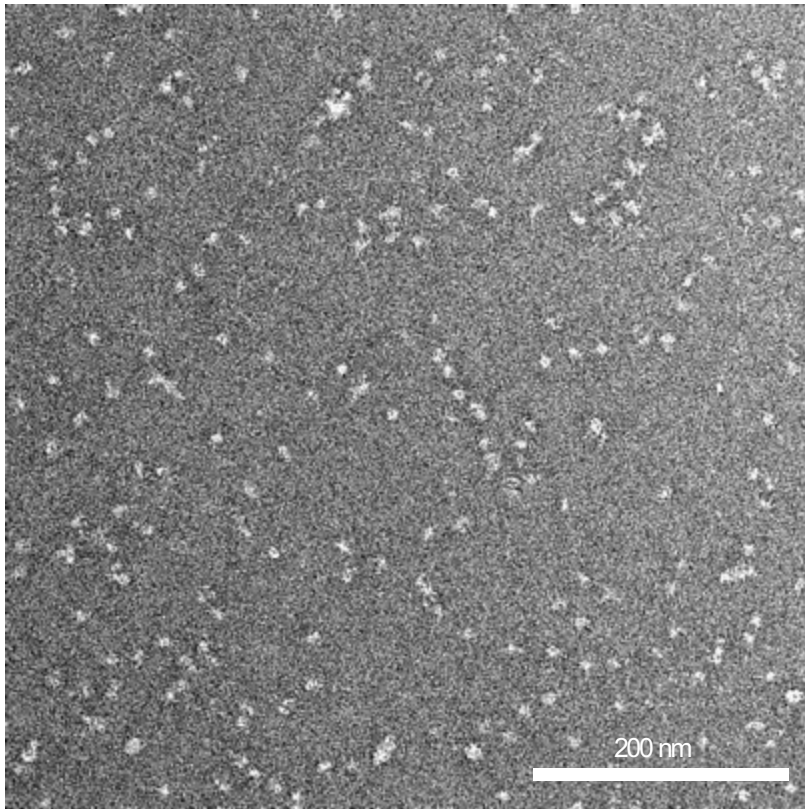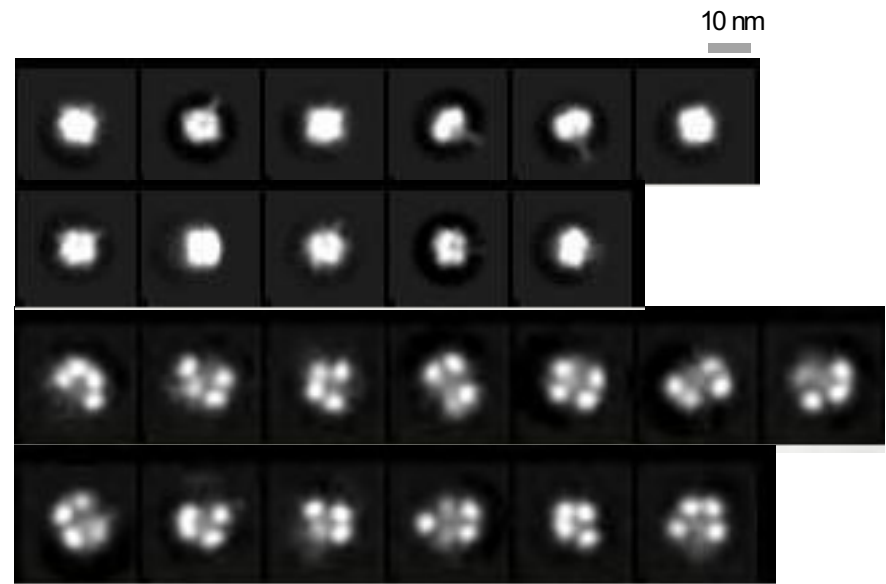

Total particles picked: 60706  
Total particles clearly in closed state: 24213  
Total particles clearly in open state: 6424



## N4-DB16-WT

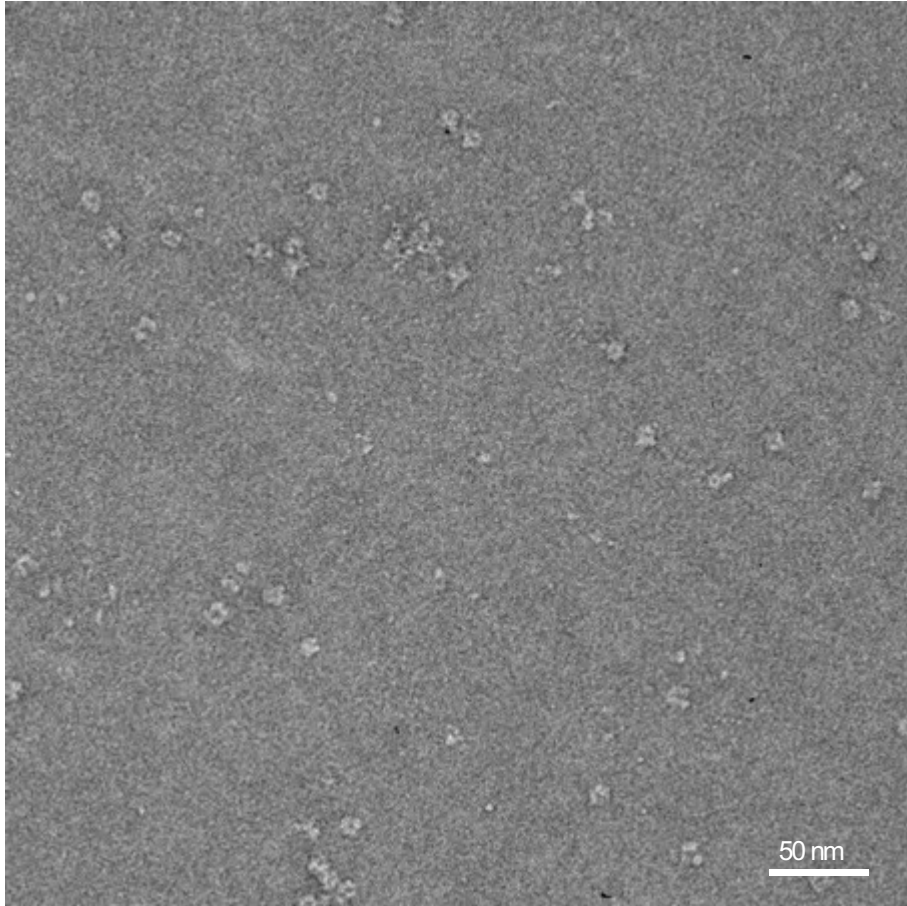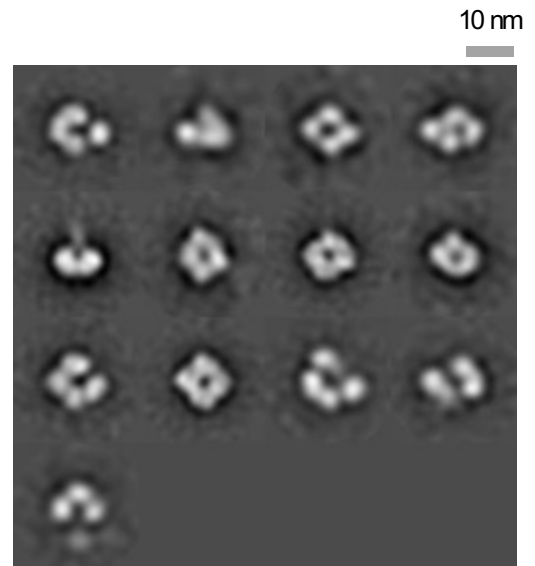

Total particles picked: 2604

Total particles clearly in closed state: 1395

Total particles clearly in open state: 619

## N7-NE03-WT

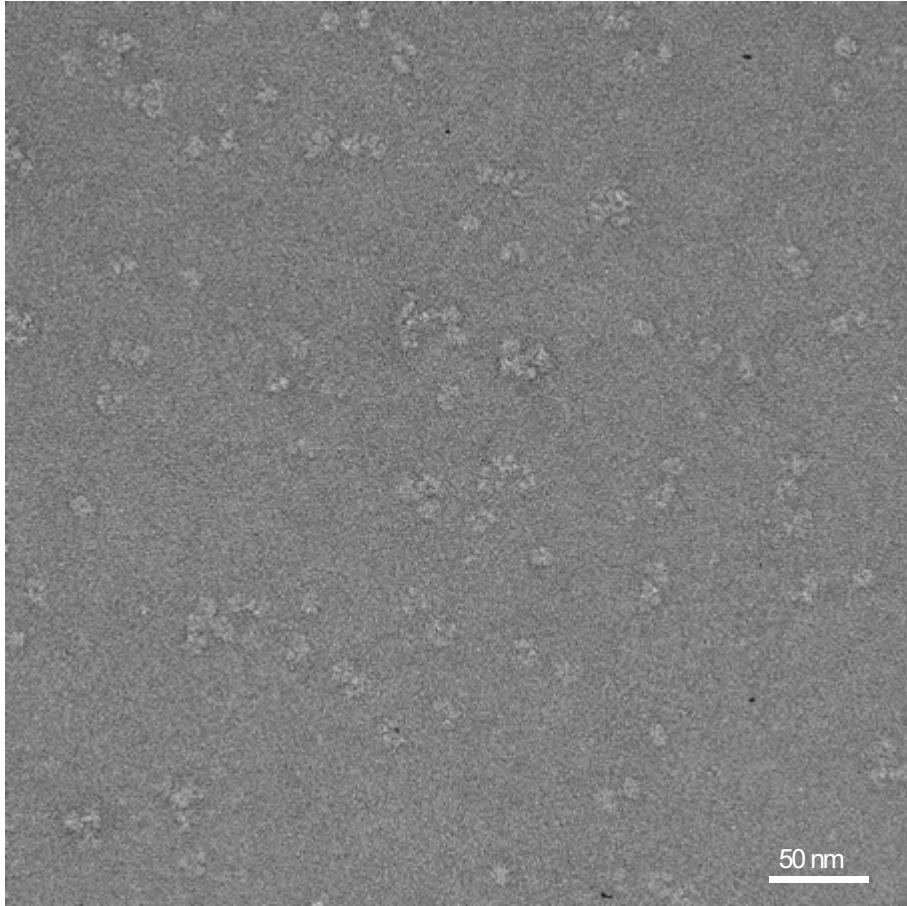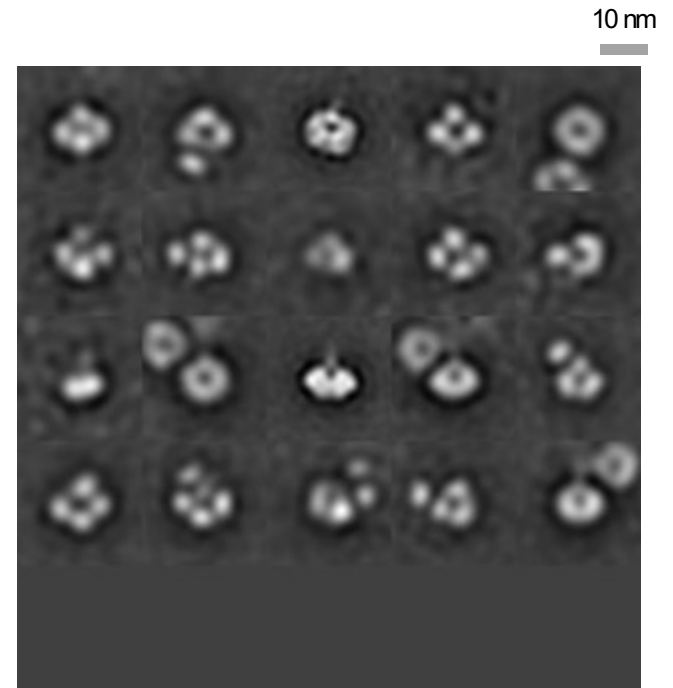

Total particles picked: 3933

Total particles clearly in closed state: 1413

Total particles clearly in open state: 570

# N8-JD13-WT

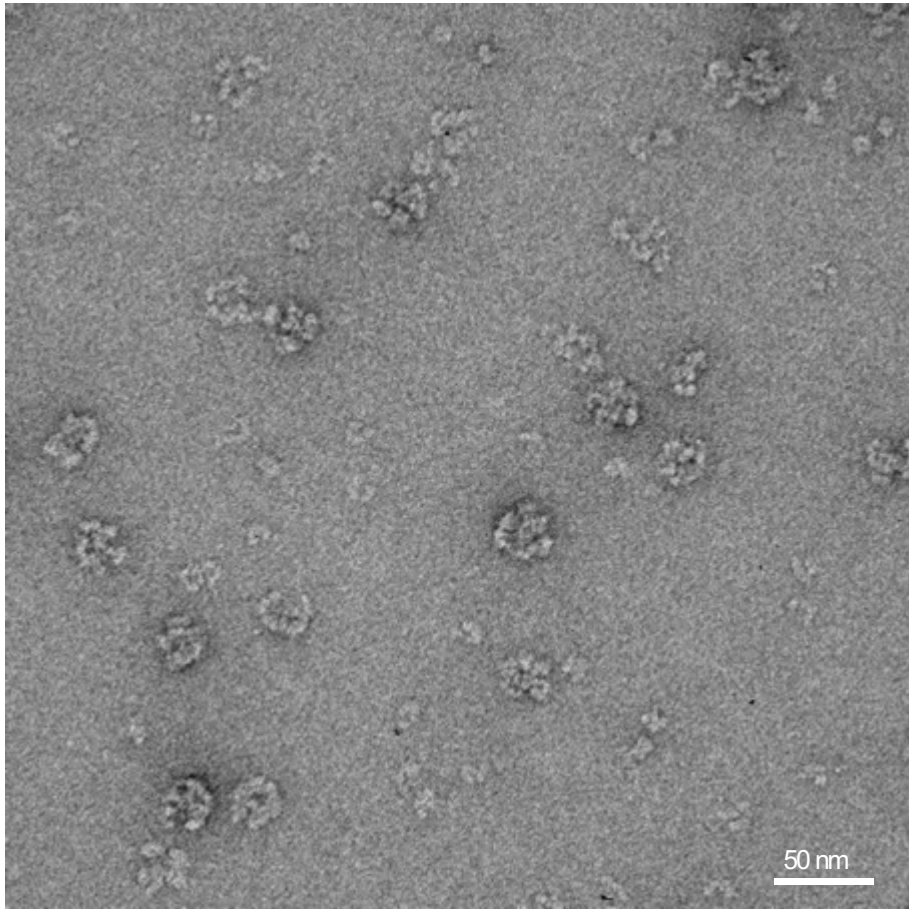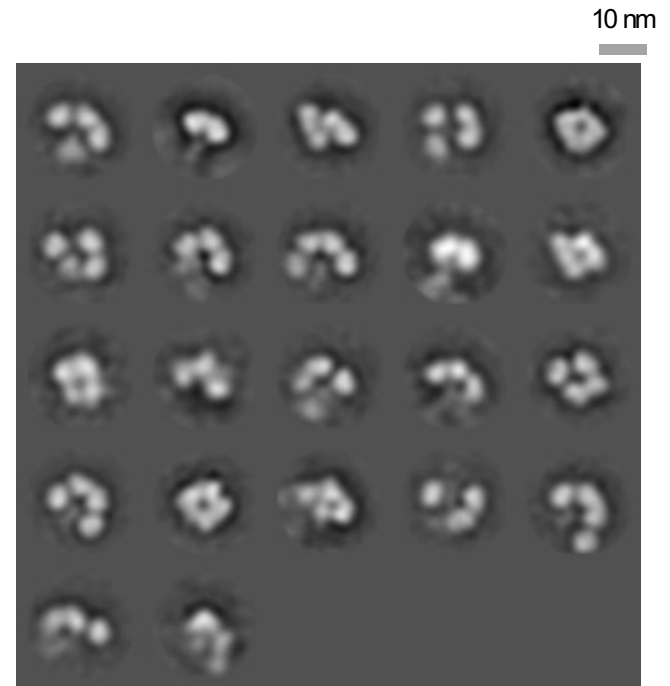

Total particles picked: 7599

Total particles clearly in closed state: 1688

Total particles clearly in open state: 3304

## N9-AN13-WT

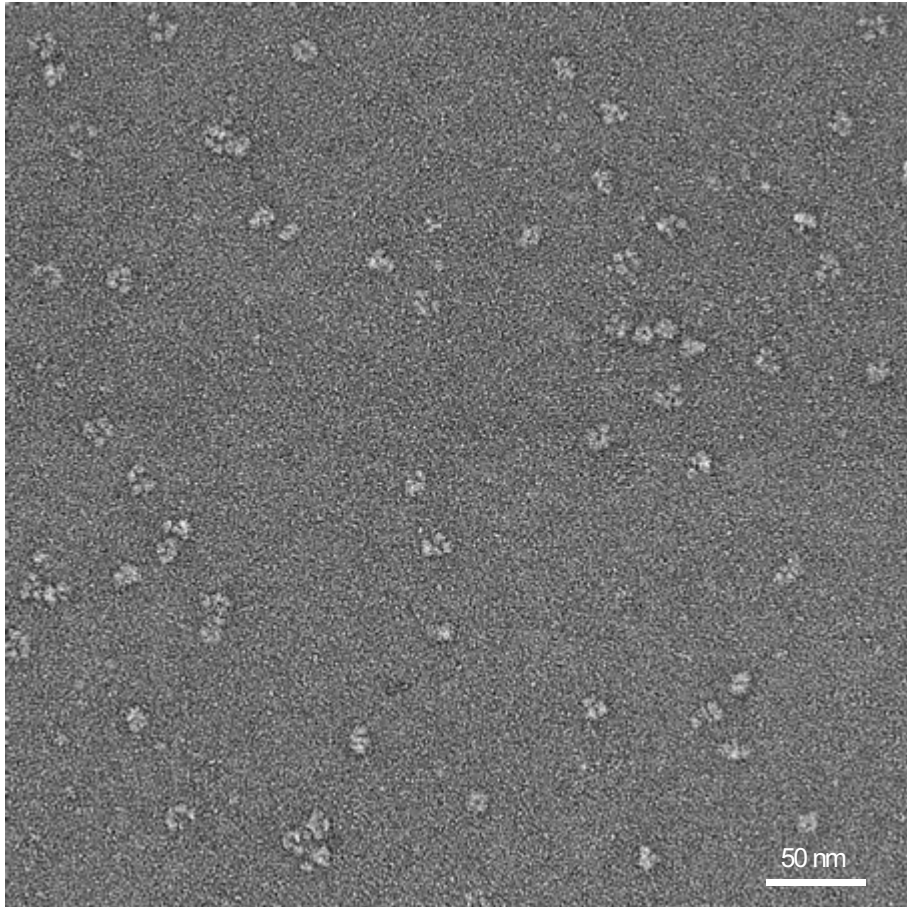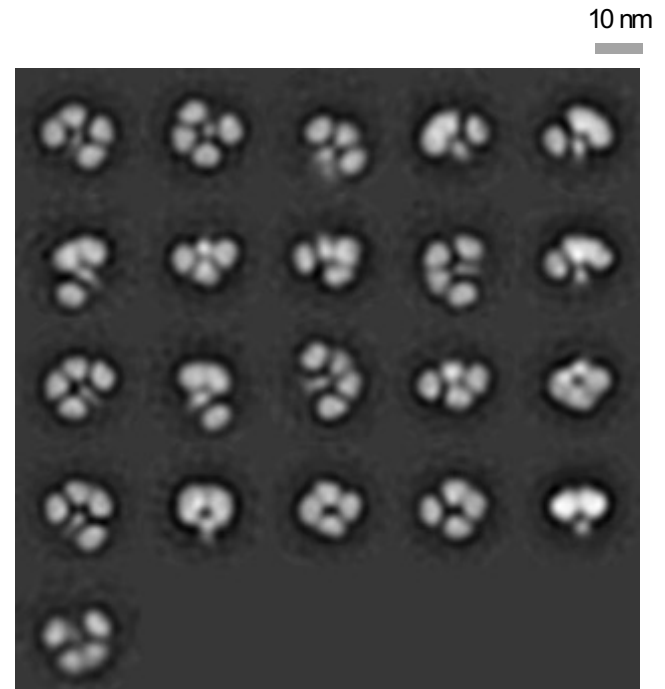

Total particles picked: 8020

Total particles clearly in closed state: 1435

Total particles clearly in open state: 5262

## N2-WI05-WT

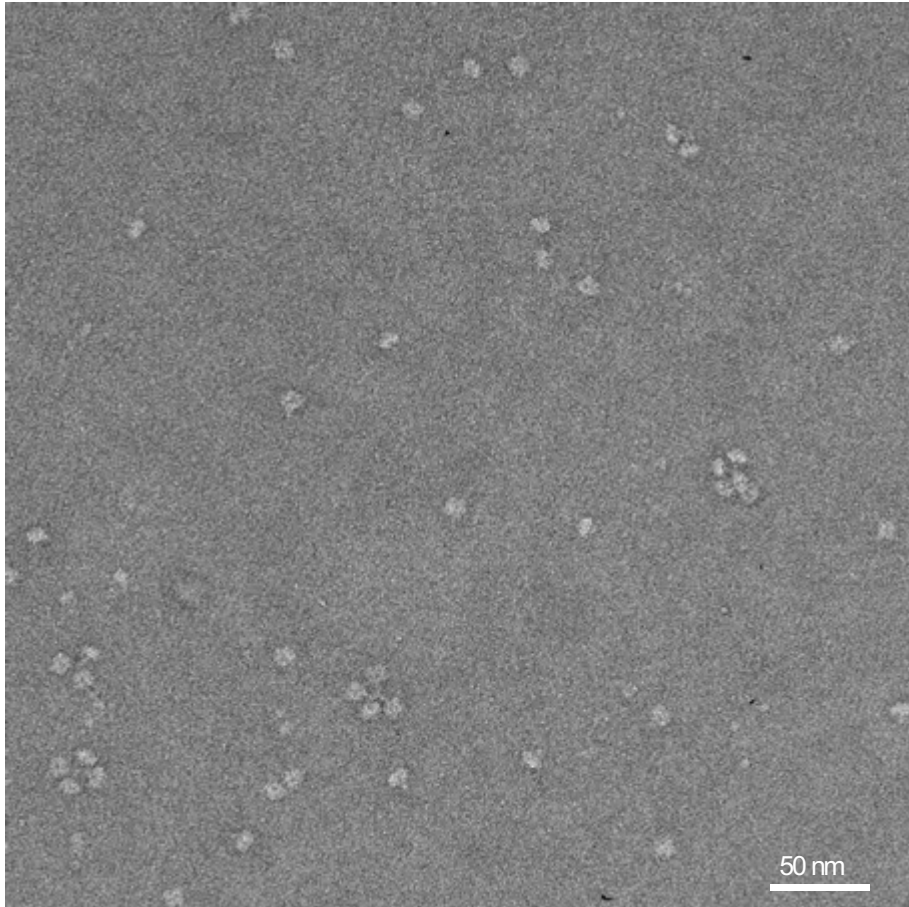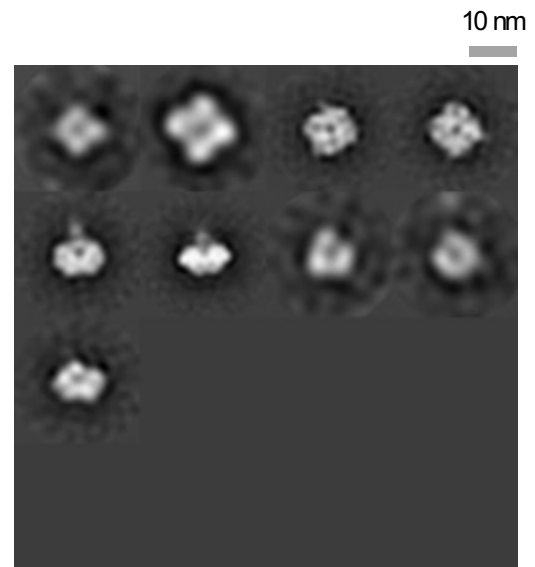

Total particles picked: 2386

Total particles clearly in closed state: 2117

Total particles clearly in open state: 0

## N2-IN11-WT

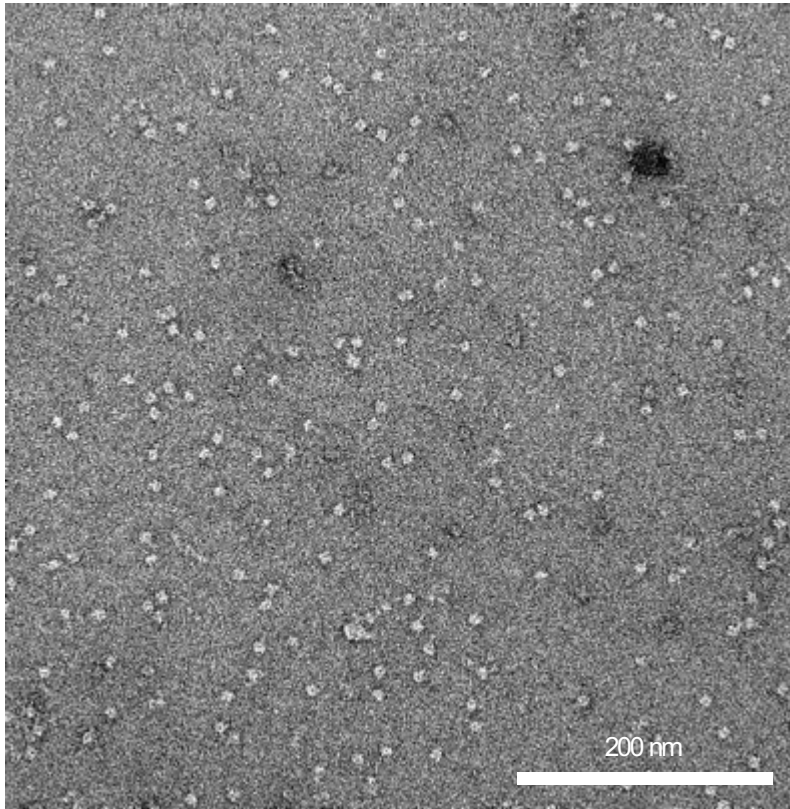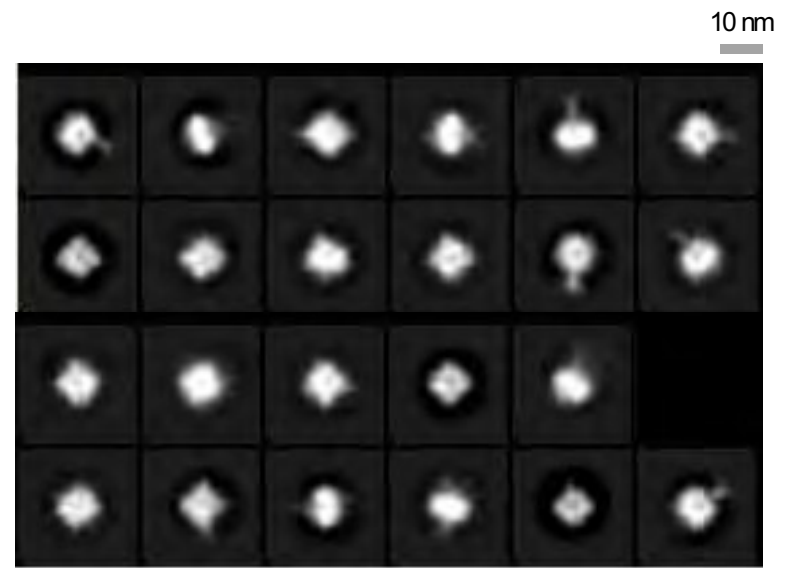

Total particles picked: 62551  
Total particles clearly in closed state: 22866  
Total particles clearly in open state: 0

# N3-MI06-WT

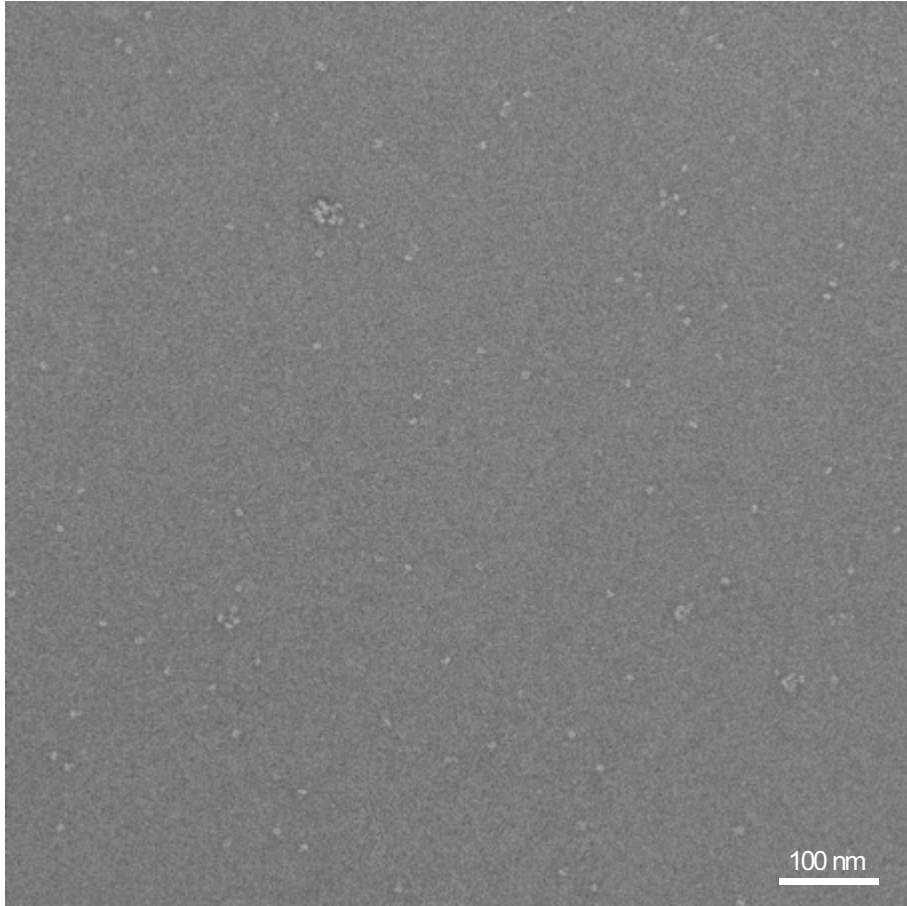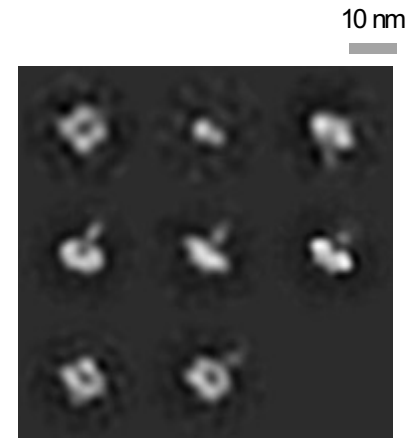

Total particles picked: 6166

Total particles clearly in closed state: 3477

Total particles clearly in open state: 0

## N5-DB16-WT

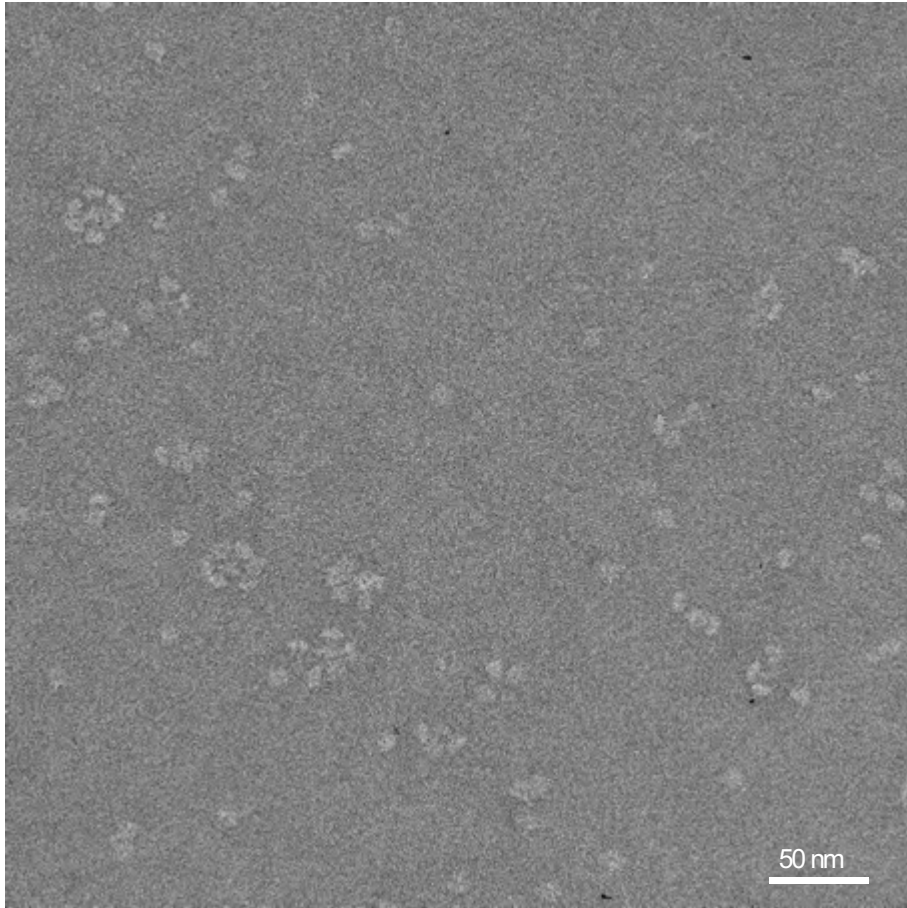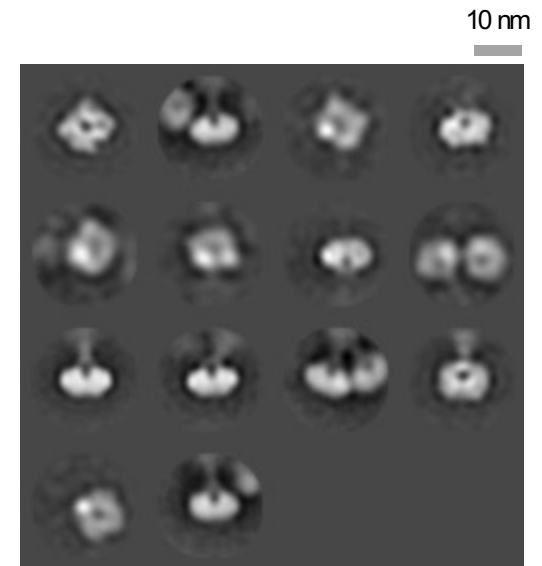

Total particles picked: 8042

Total particles clearly in closed state: 5576

Total particles clearly in open state: 0



# B-CO17-WT

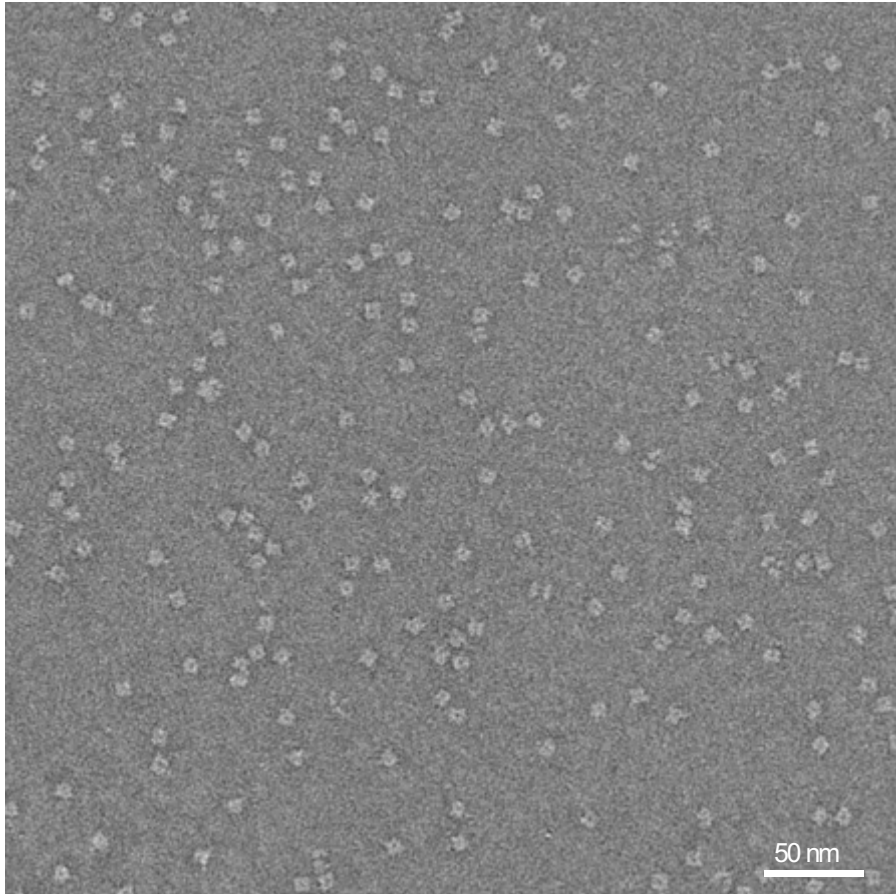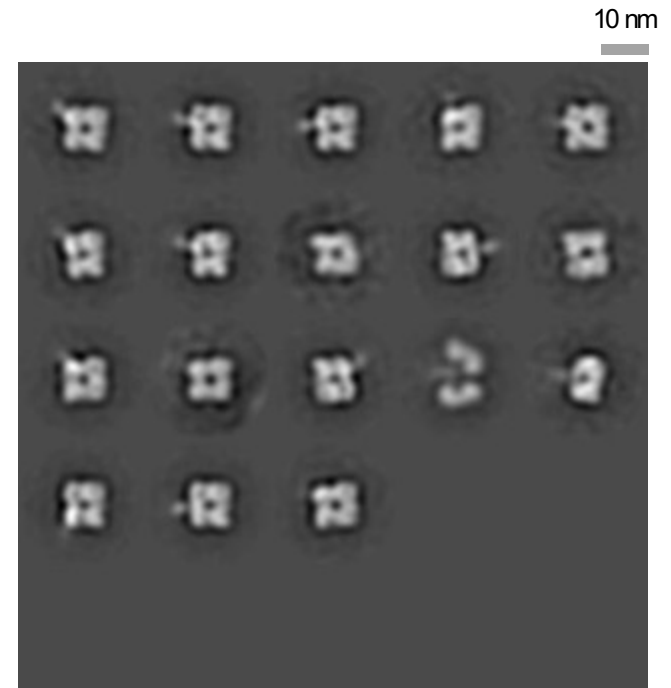

Total particles picked: 12896

Total particles clearly in closed state: 12328

Total particles clearly in open state: 425

# B-PH13-WT

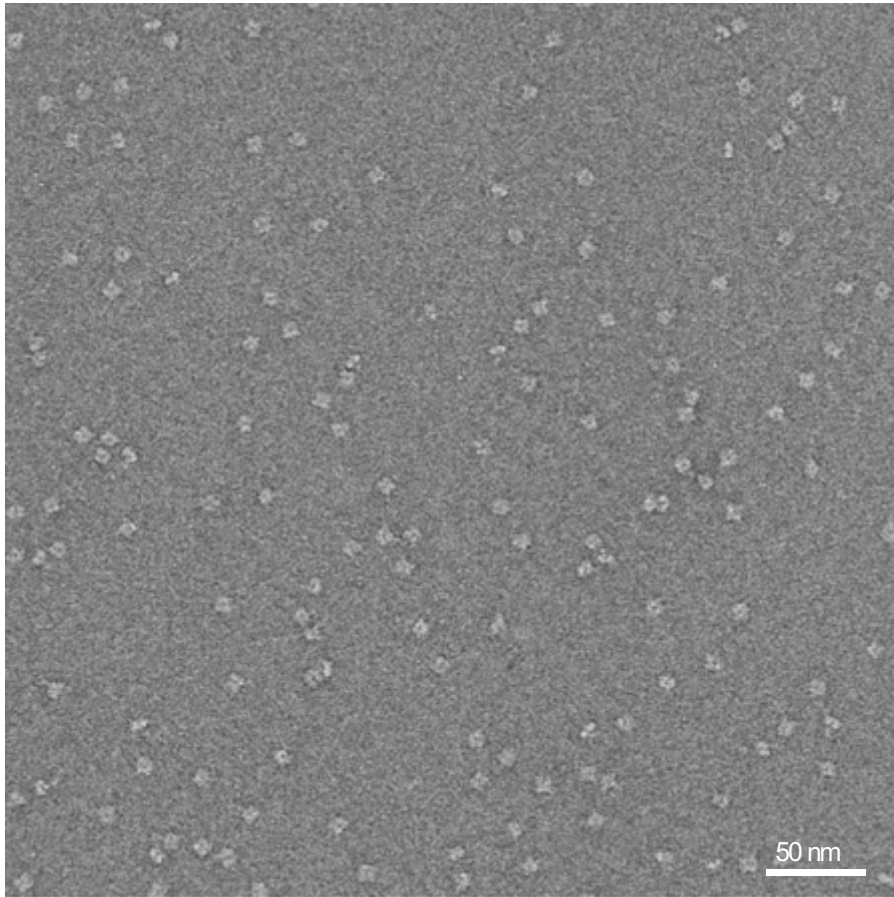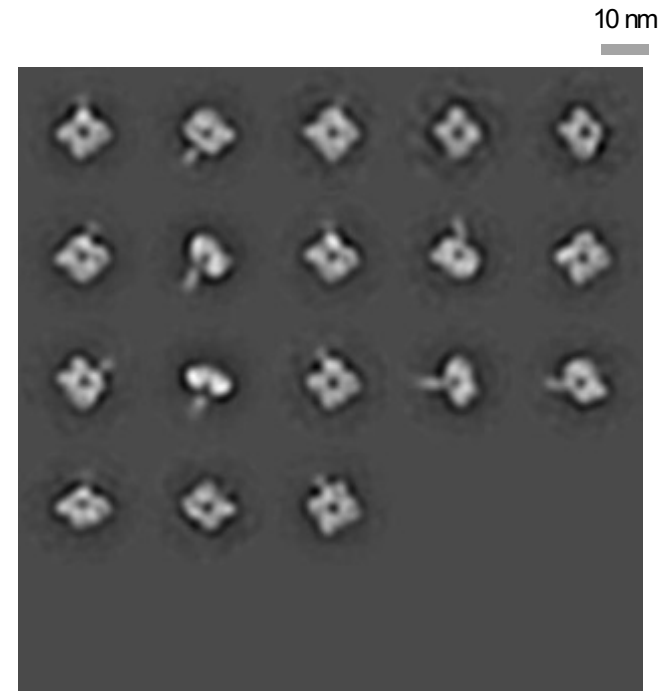

Total particles picked: 9972

Total particles clearly in closed state: 9817

Total particles clearly in open state: 0

# N9-AN13-Y170H

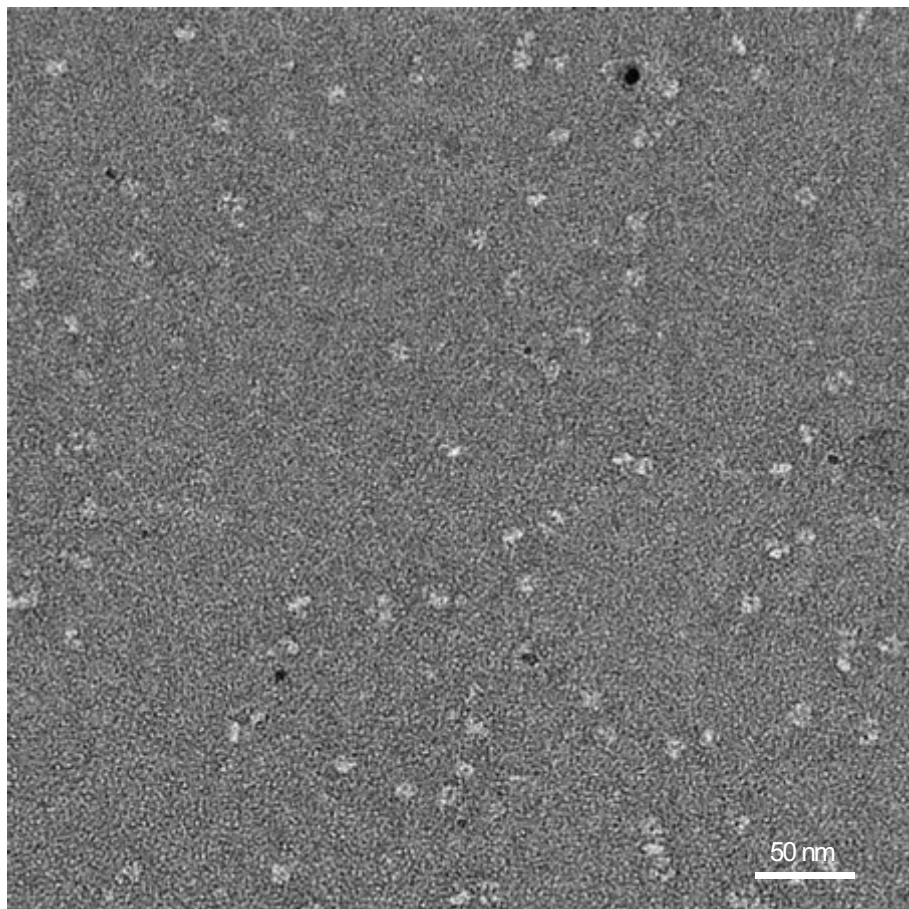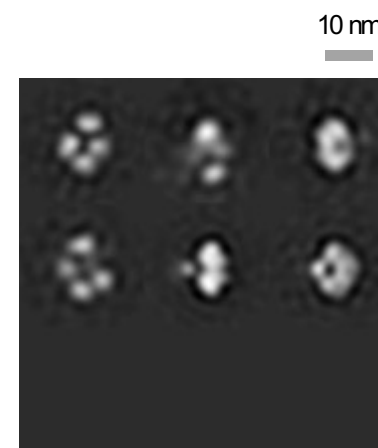

Total particles picked: 8592

Total particles clearly in closed state: 3059

Total particles clearly in open state: 1164

## N2-WI05-WT, obtained from BEI Resources

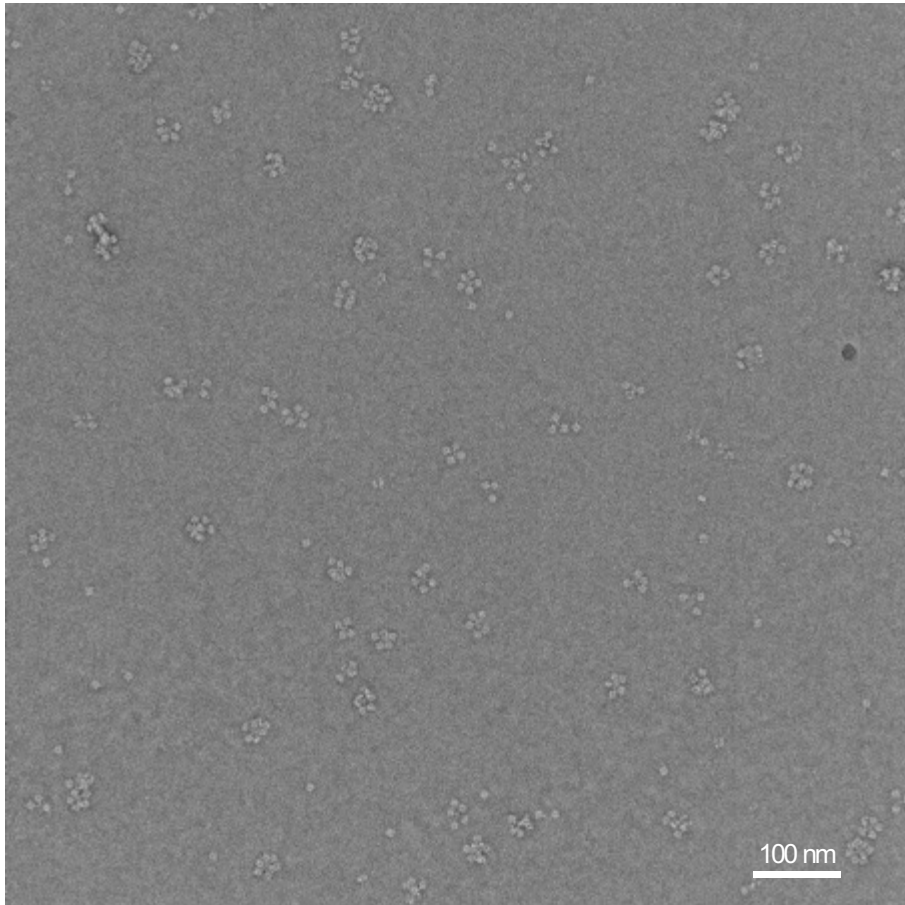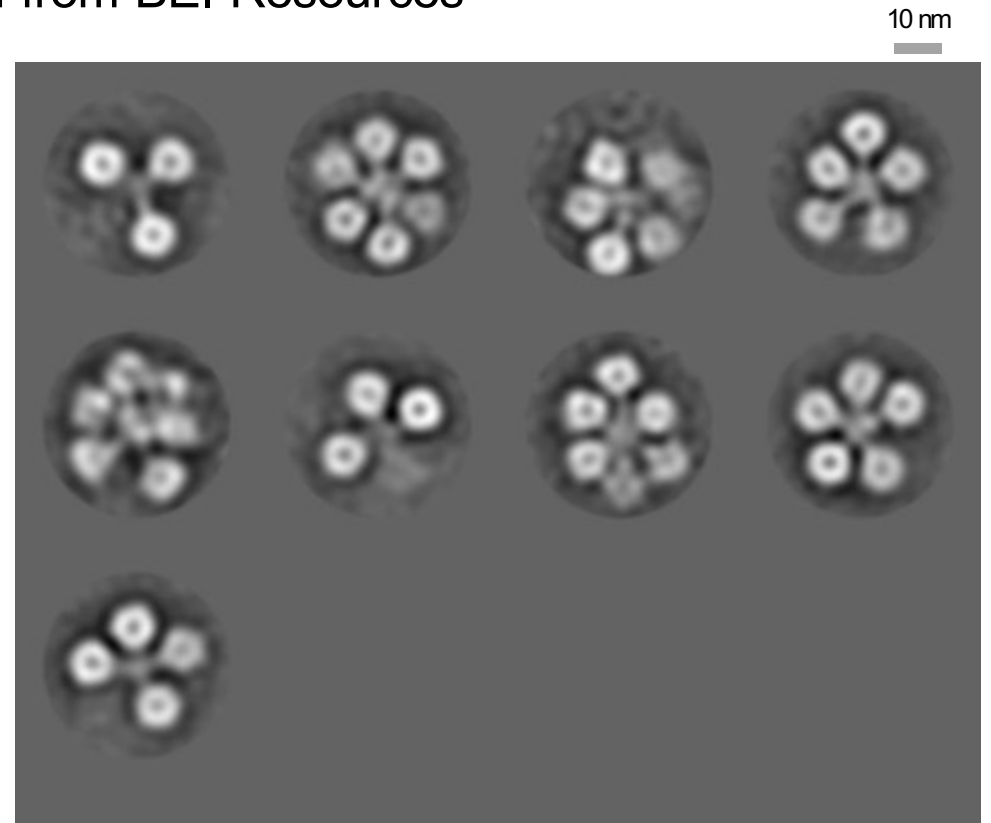

Total particles picked: 1190

No tetramers quantified alone, however tetramers in clusters appear predominantly closed

## N1-NC99-WT, obtained from BEI Resources

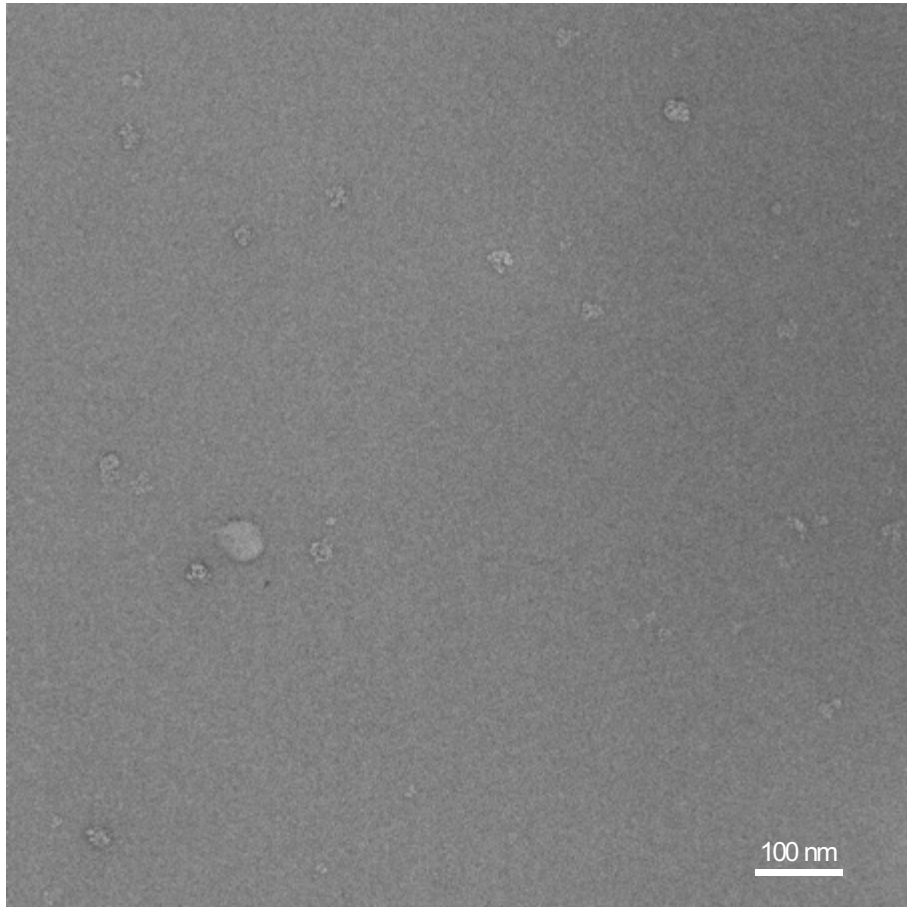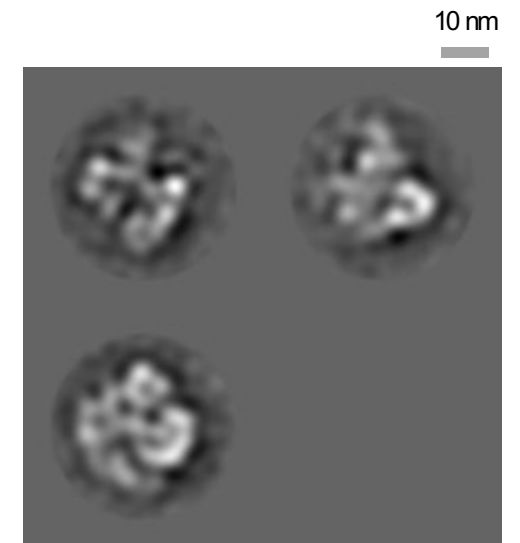

Total particles picked: 1325

No tetramers quantified alone, however no clear tetramers were present in clusters

# N1-CA09-WT, obtained from BEI Resources

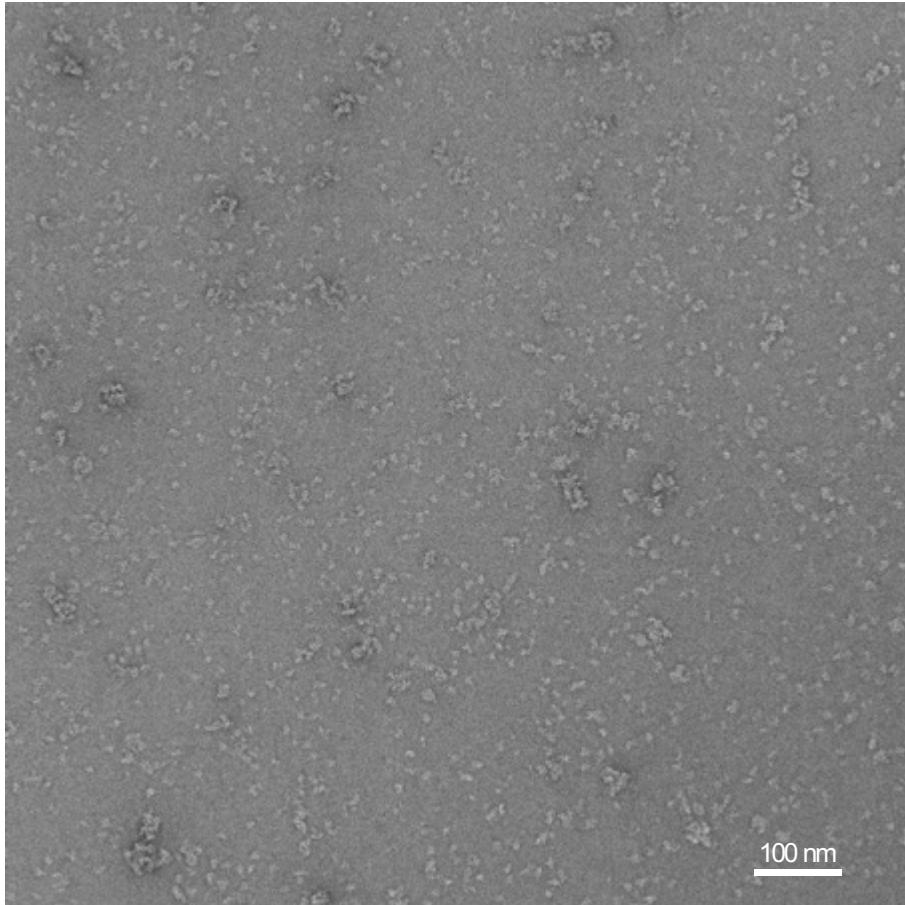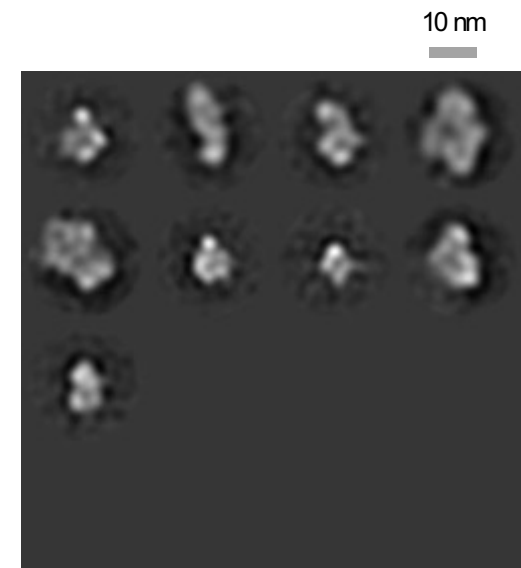

Total particles picked: 6382  
No clear tetramers observed to quantify

# N1-CA09-WT with 1mM CaCl<sub>2</sub> added after purification

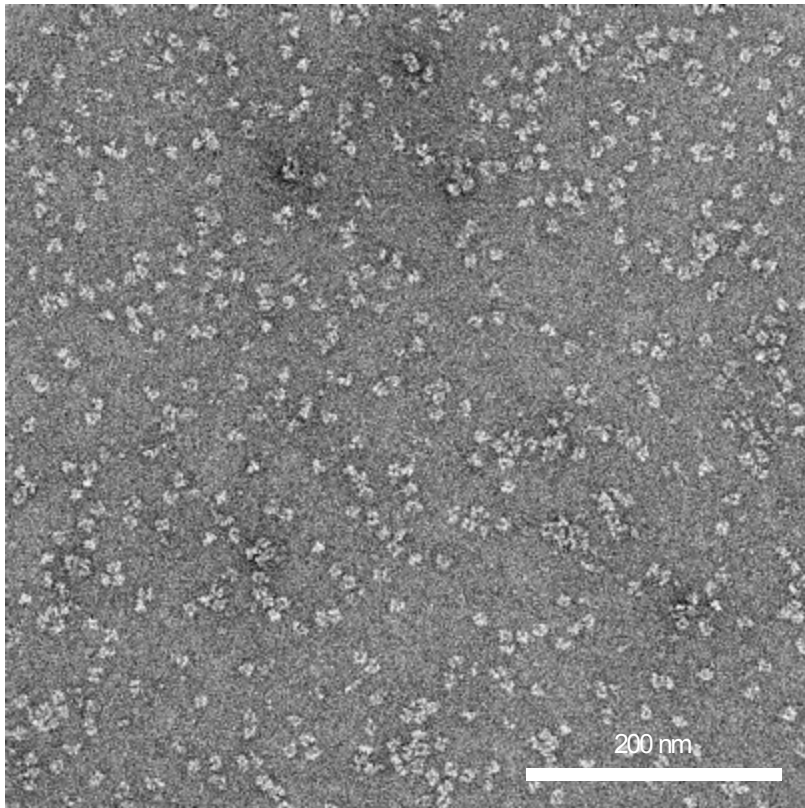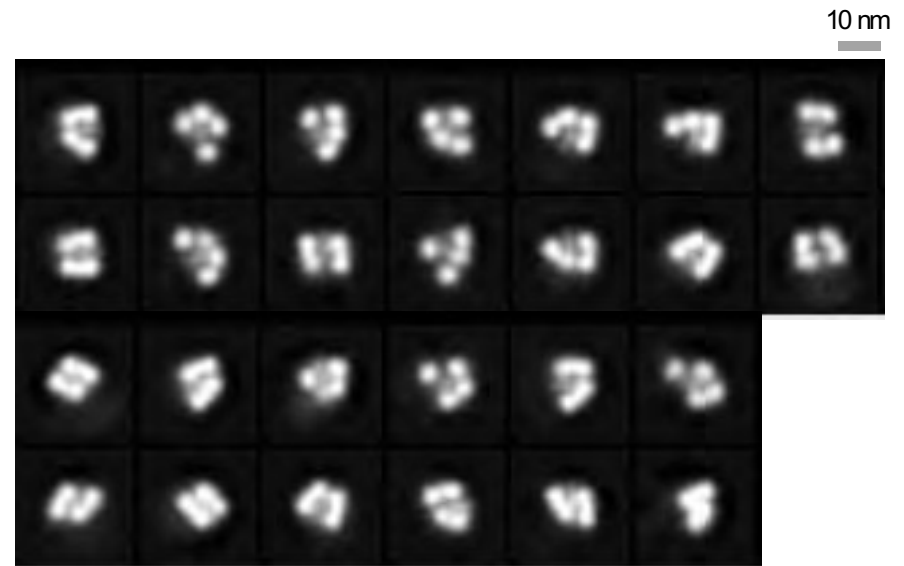

Total particles picked: 56046

Total particles clearly in closed state: 738

Total particles clearly in open state: 46410

# N1-CA09-WT with 1mM CaCl<sub>2</sub> added throughout purification process

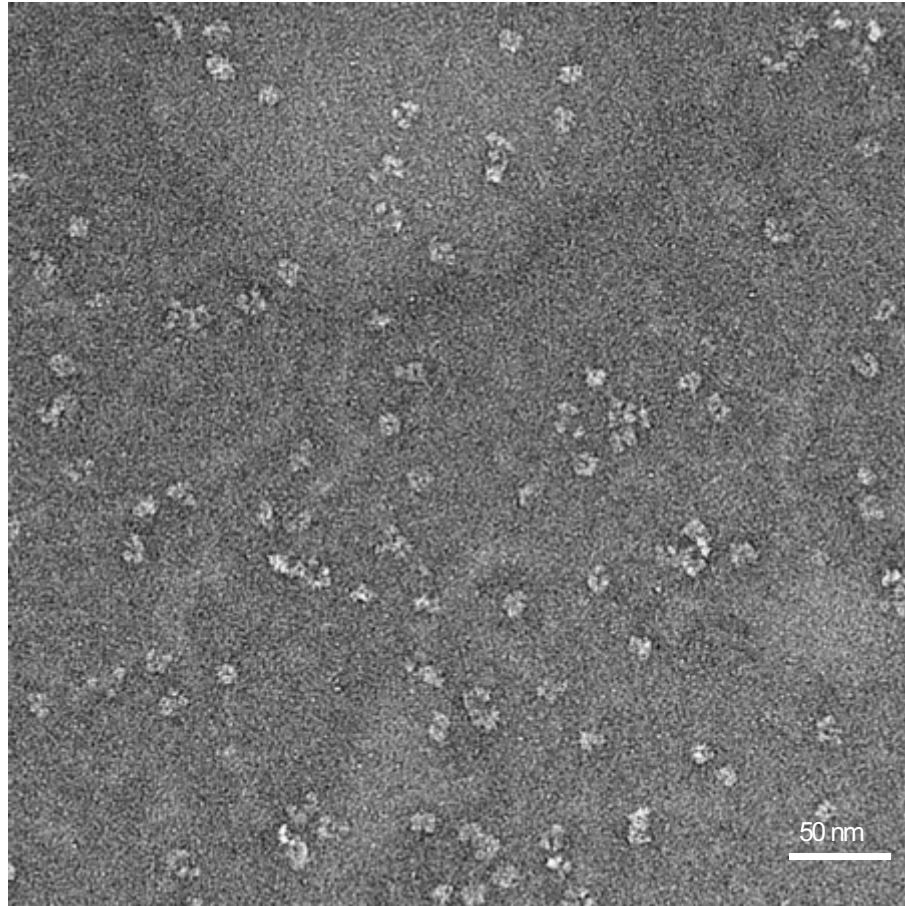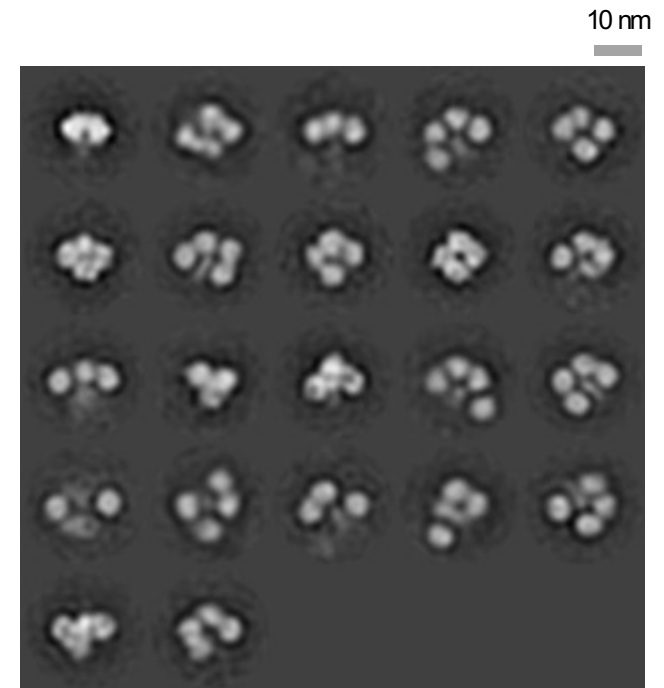

Total particles picked: 6847

Total particles clearly in closed state: 1051

Total particles clearly in open state: 4600



# N1-MI15-WT with 1mM CaCl<sub>2</sub> added throughout purification process

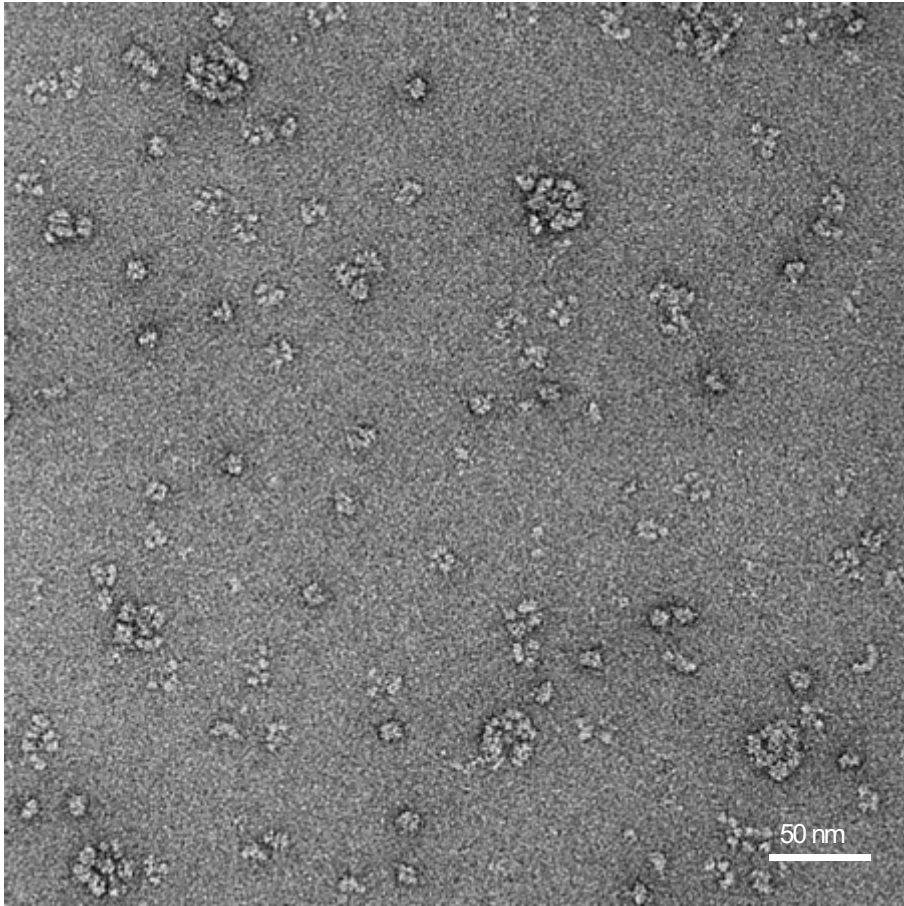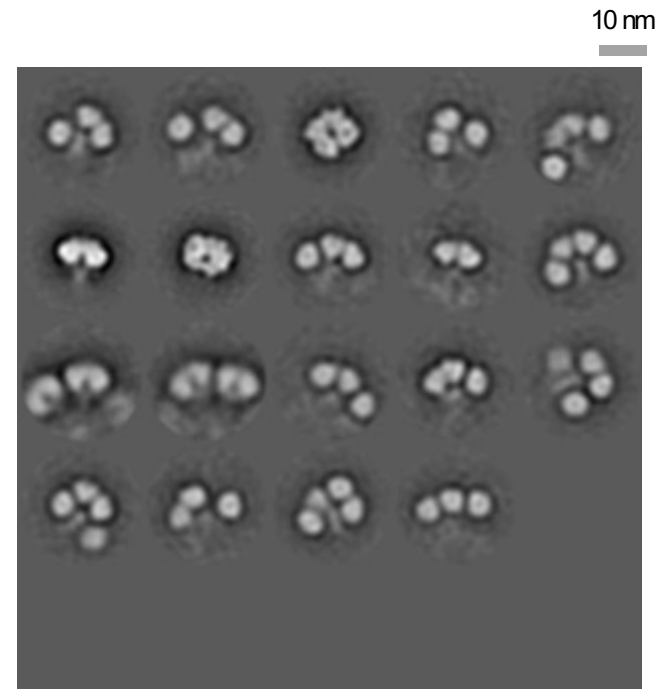

Total particles picked: 7756

Total particles clearly in closed state: 1760

Total particles clearly in open state: 4127

## N1-CA09-WT + Stalk

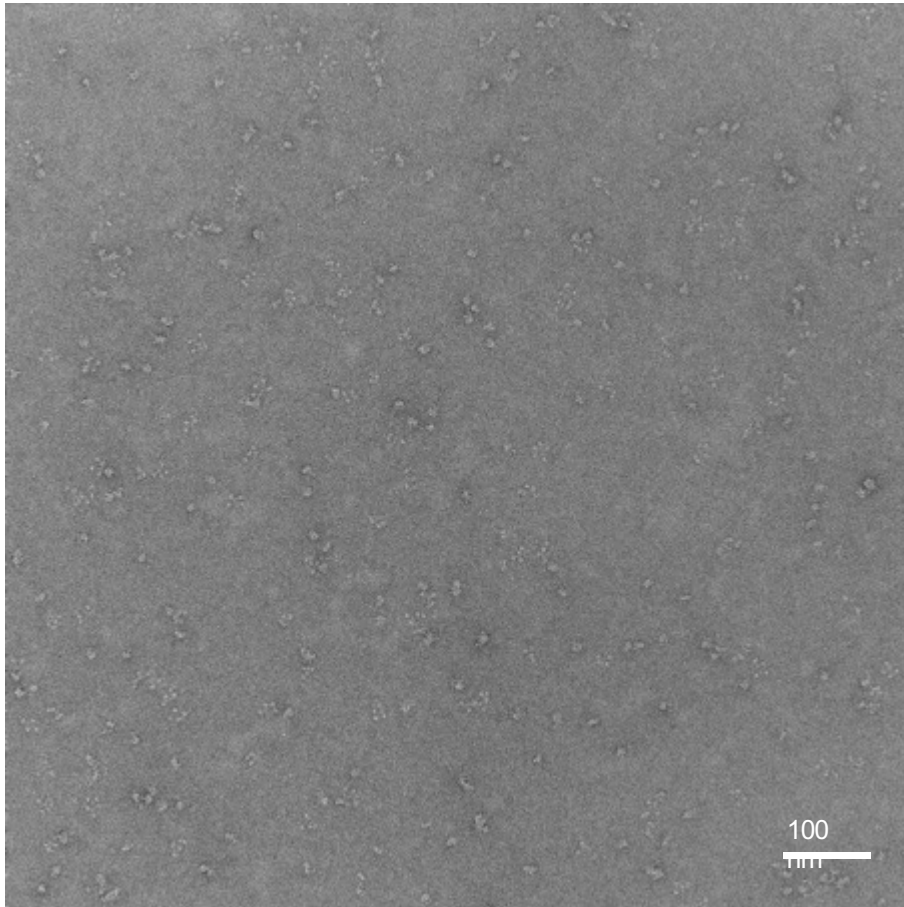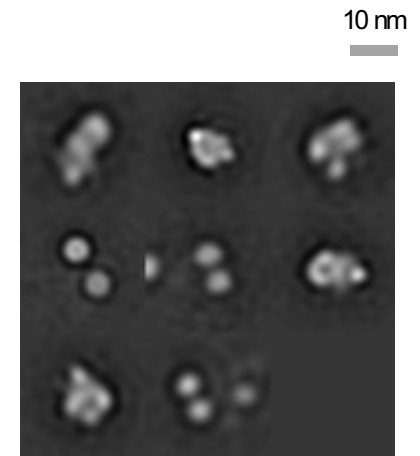

Total particles picked: 8619

Total particles clearly in closed state: 0

Total particles clearly in open state: 0

Classes appeared largely disordered

N1-CA09-WT + Stalk with 1mM CaCl<sub>2</sub> added throughout purification process

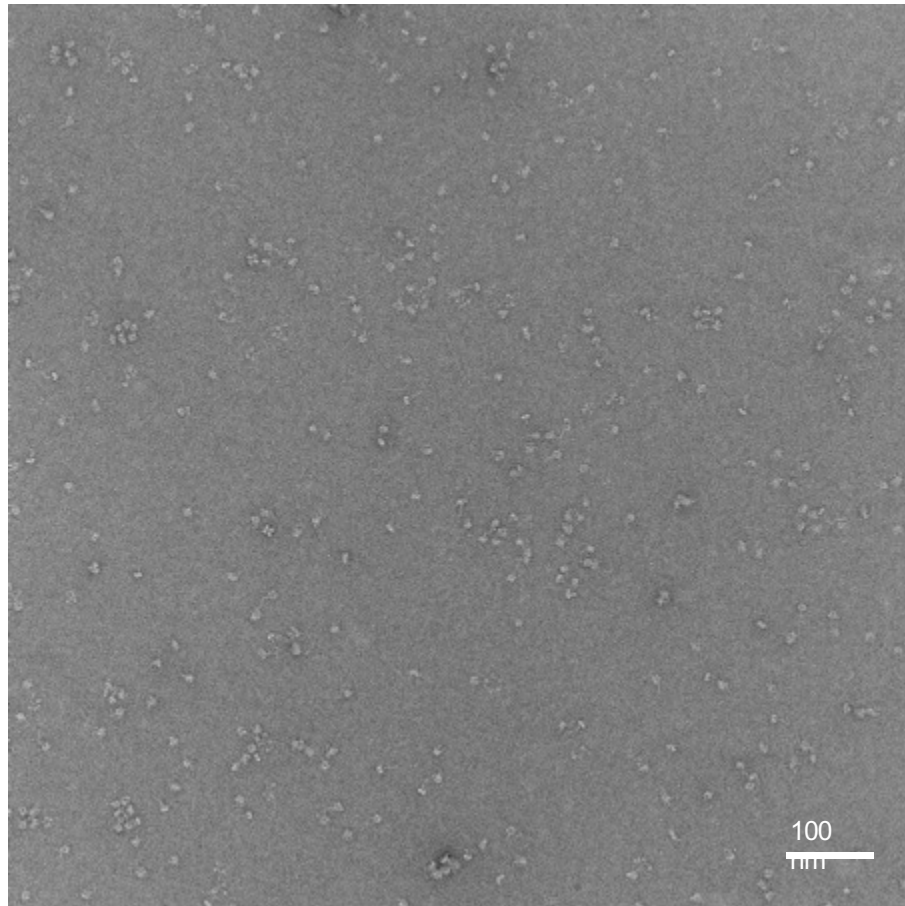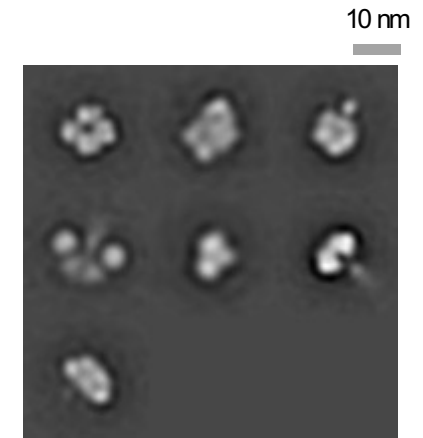

Total particles picked: 9097

Total particles clearly in closed state: 3335

Total particles clearly in open state: 389

Many particles appeared otherwise disordered

# N1-CA09-sNAp-94

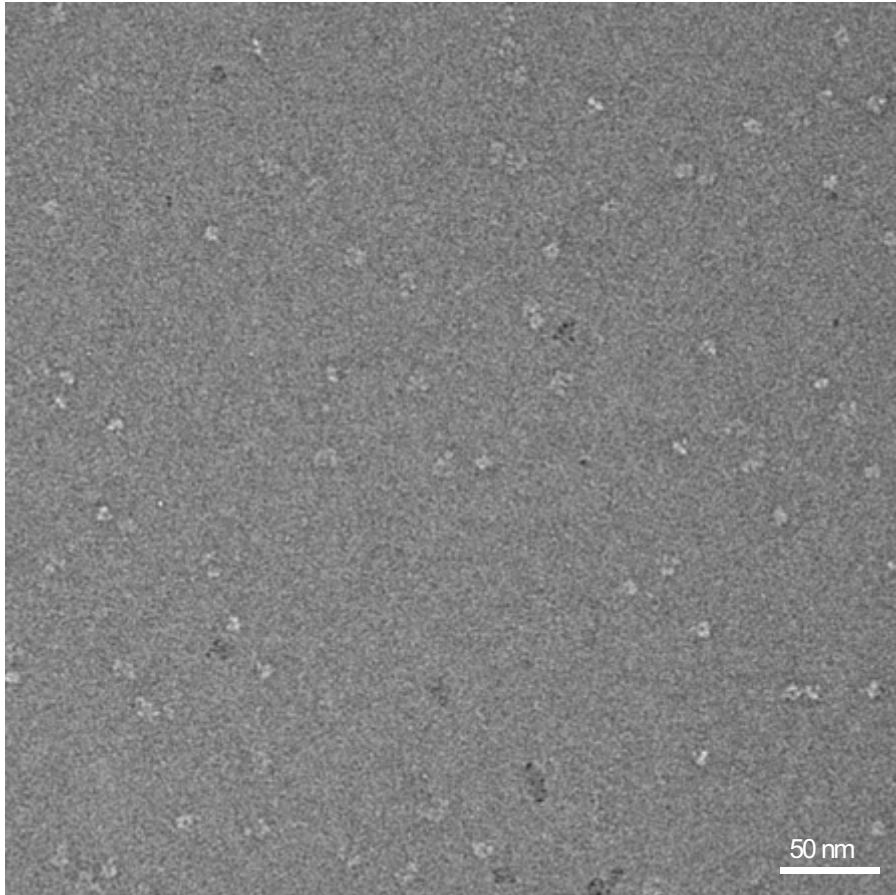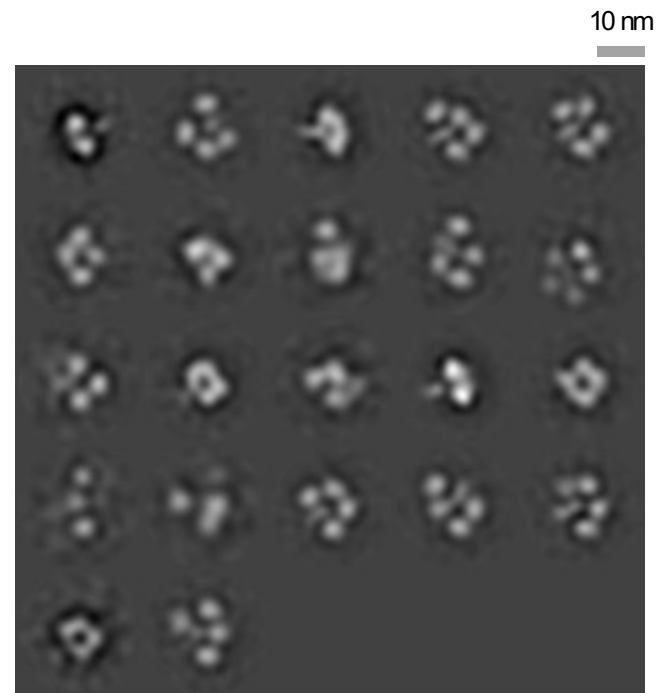

Total particles picked: 6596

Total particles clearly in closed state: 2471

Total particles clearly in open state: 2585

# N1-CA09-sNAp-114

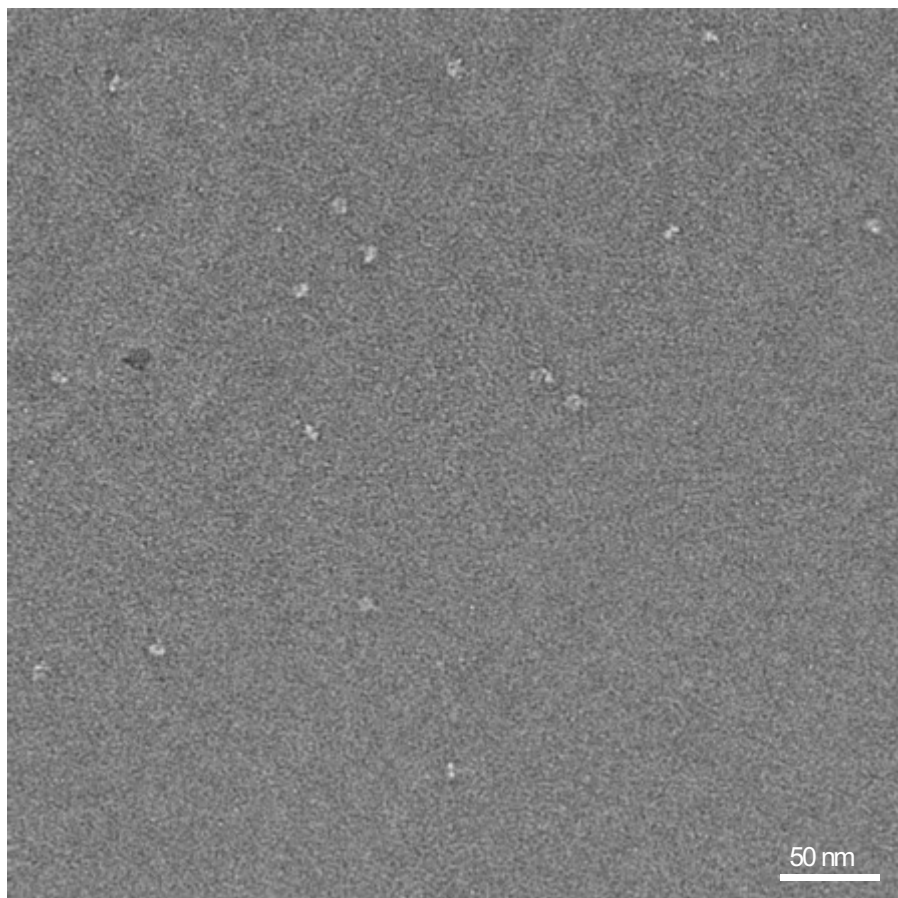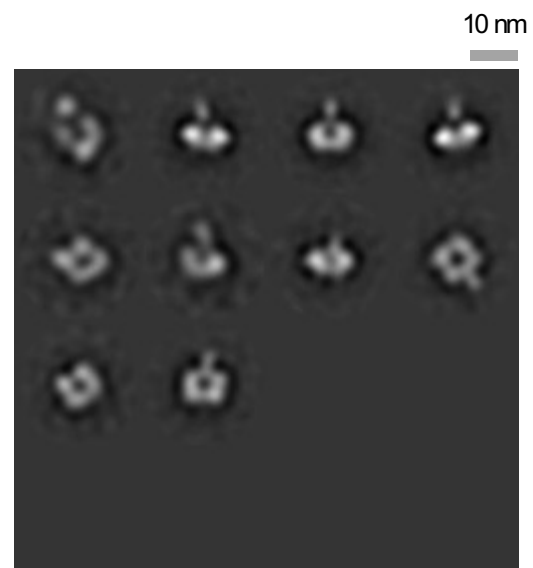

Total particles picked: 3155

Total particles clearly in closed state: 1647

Total particles clearly in open state: 41

# N1-CA09-sNAp-130

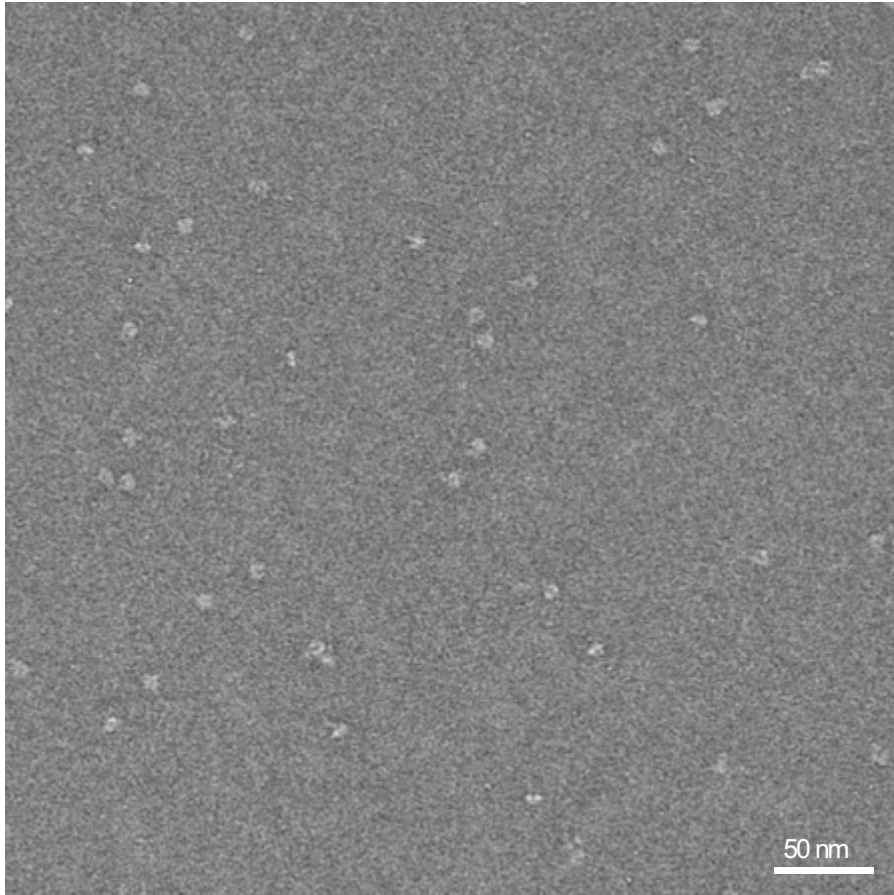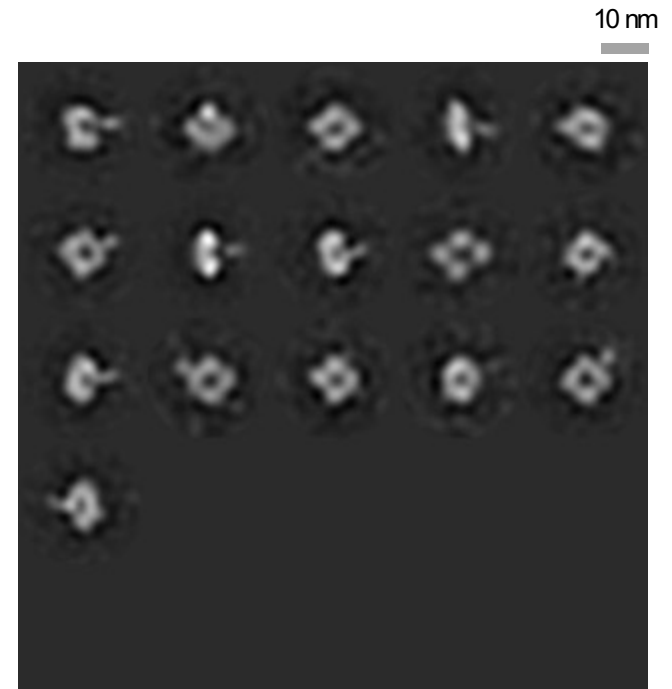

Total particles picked: 4334

Total particles clearly in closed state: 3152

Total particles clearly in open state: 0

# N1-CA09-sNAp-155

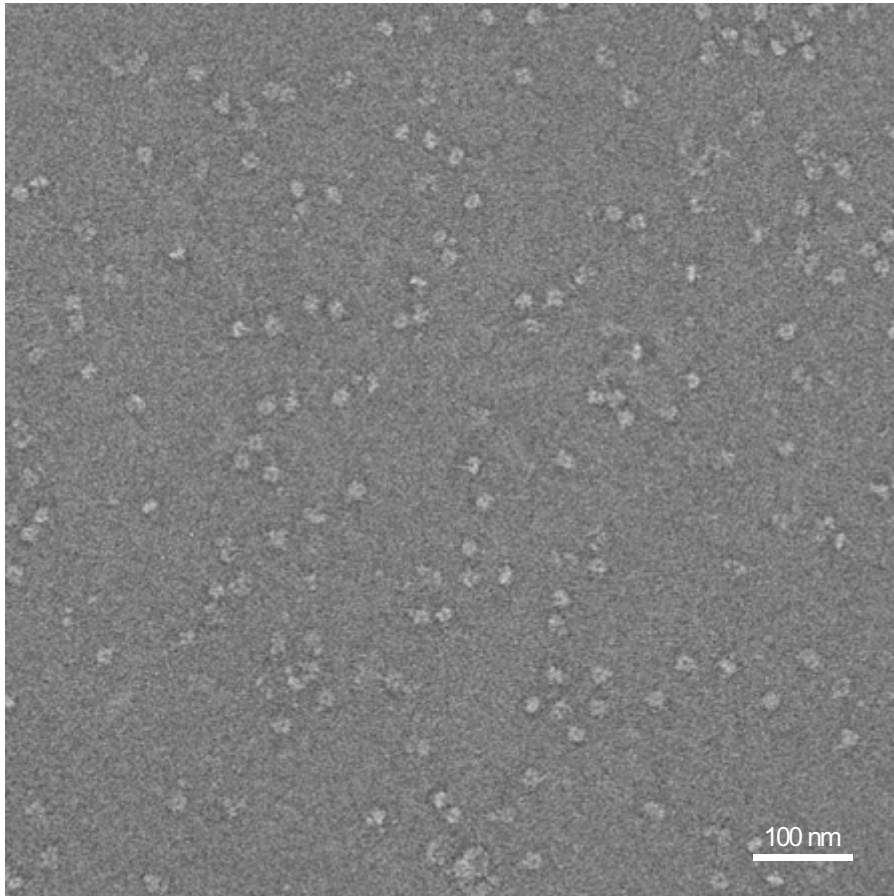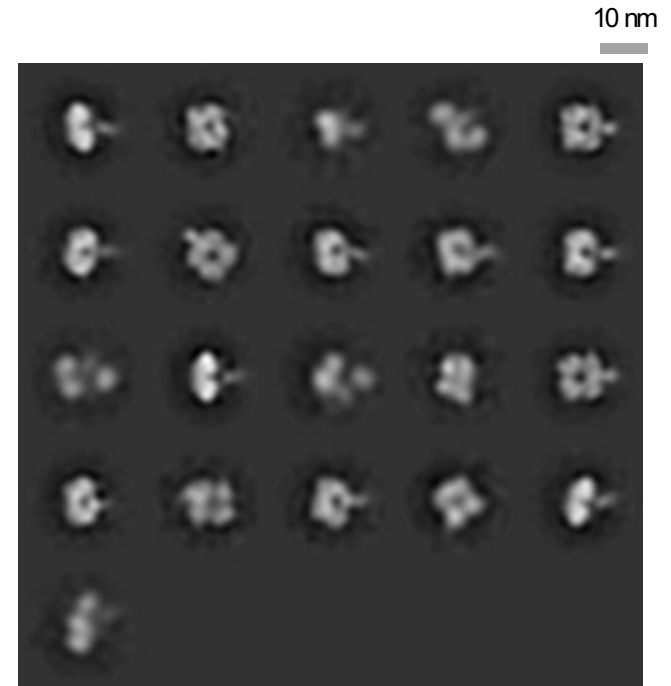

Total particles picked: 9724

Total particles clearly in closed state: 7603

Total particles clearly in open state: 1152

# N1-CA09-sNAP-155, time course study - Day 0

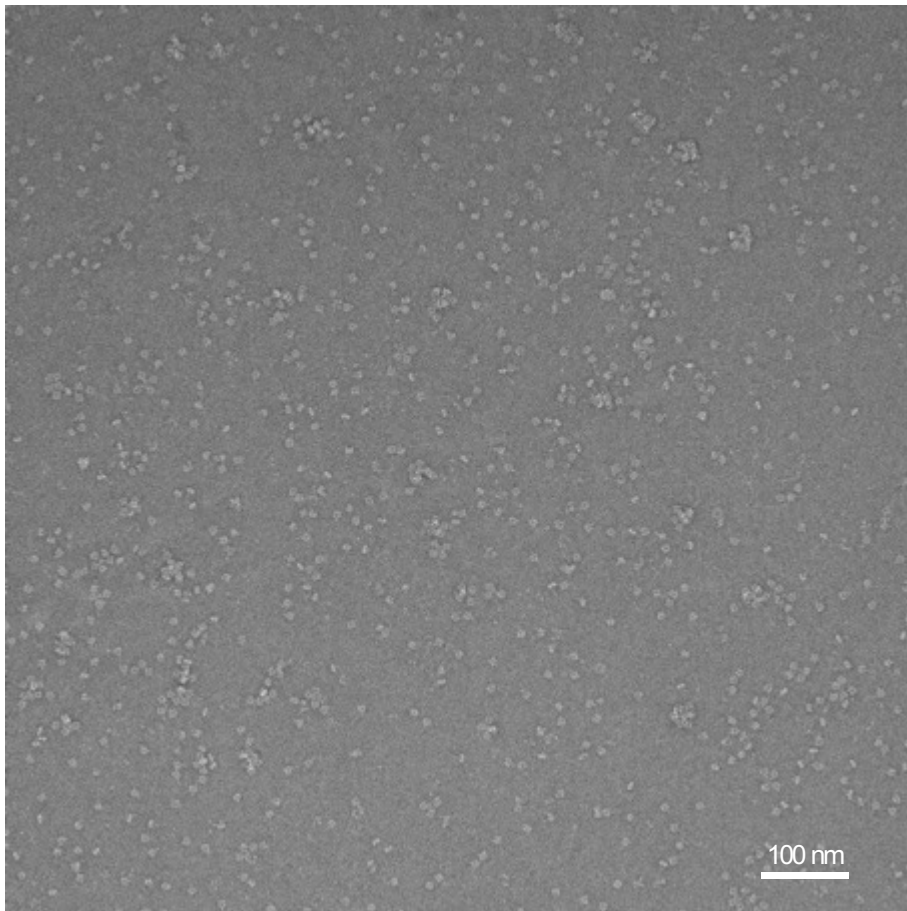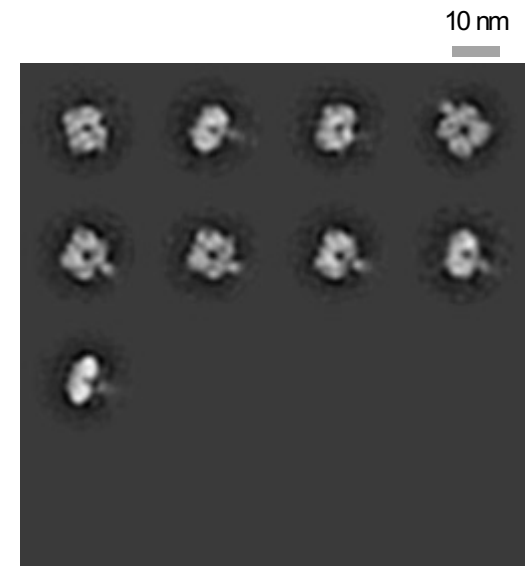

Total particles picked: 5727

Total particles clearly in closed state: 4853

Total particles clearly in open state: 0



## N1-CA09-sNAp-155, time course study - Day 6

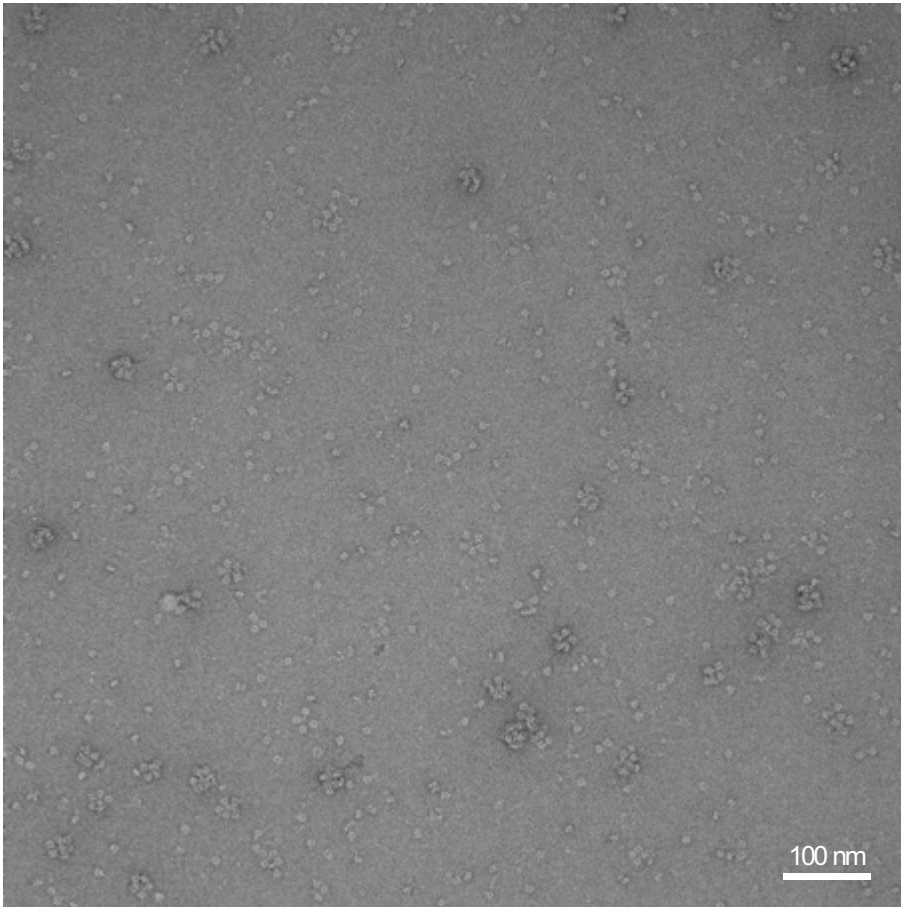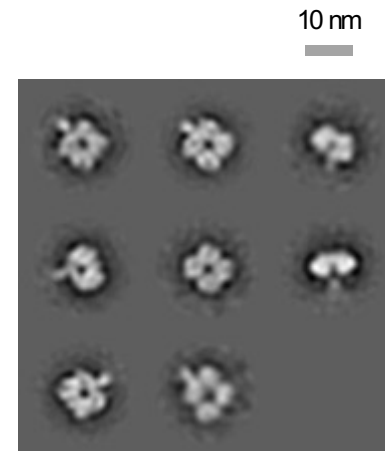

Total particles picked: 4503

Total particles clearly in closed state: 3205

Total particles clearly in open state: 0

## N1-CA09-sNAP-155, time course study - Day 10

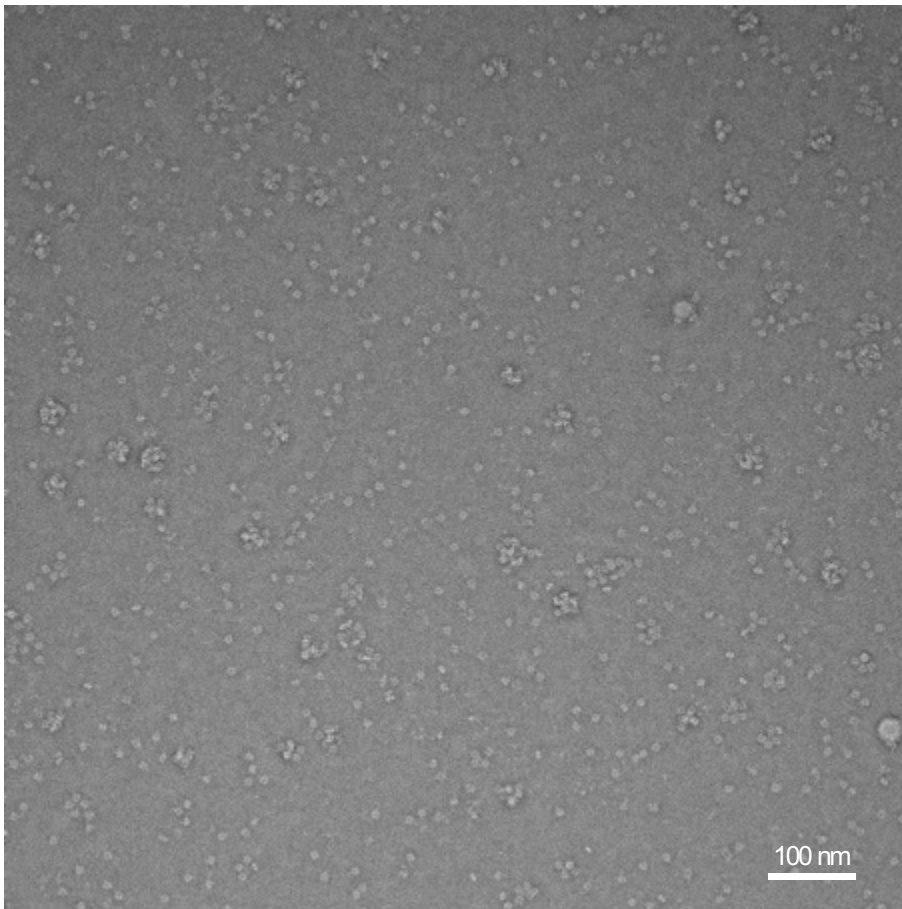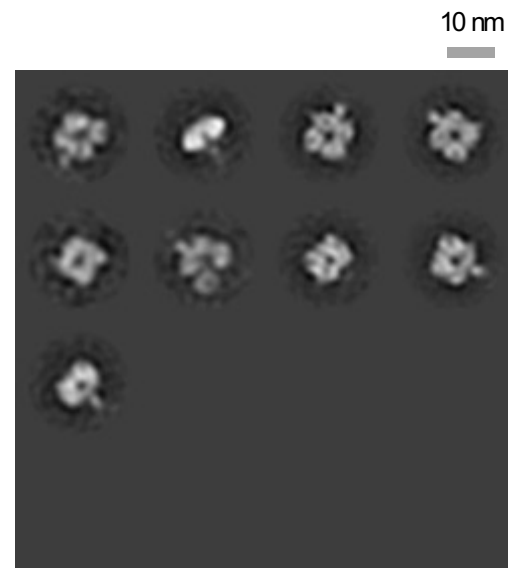

Total particles picked: 5179

Total particles clearly in closed state: 4010

Total particles clearly in open state: 0

# N1-CA09-sNAp-155, time course study - Day 15

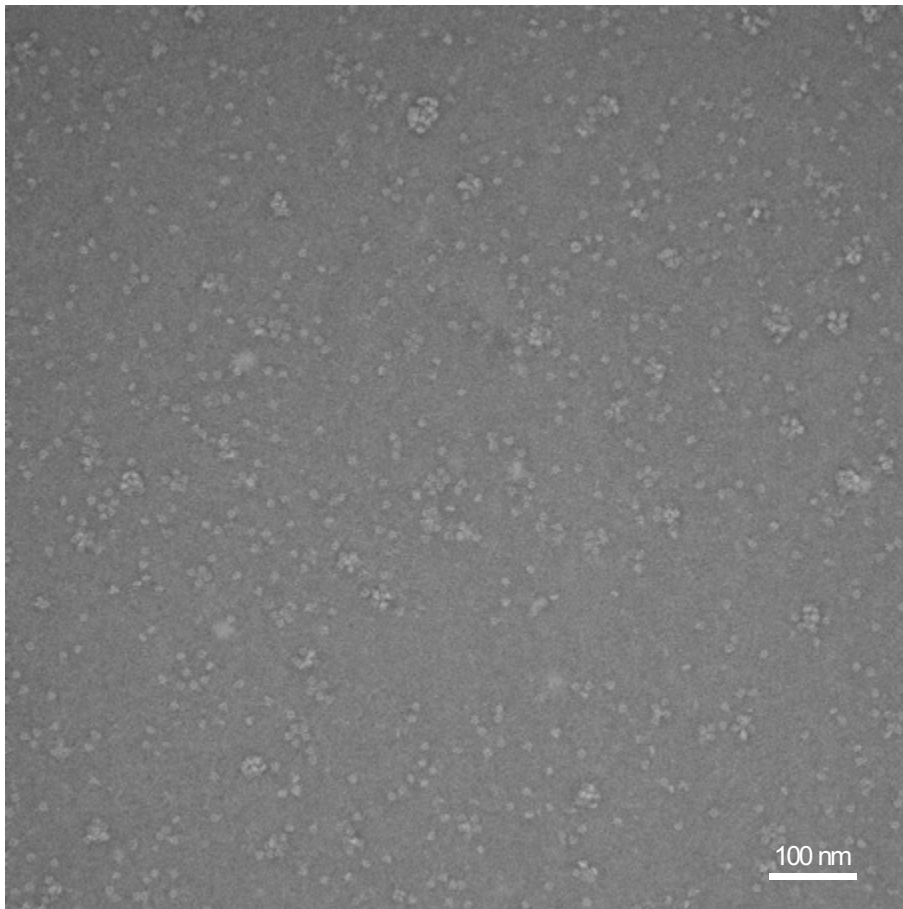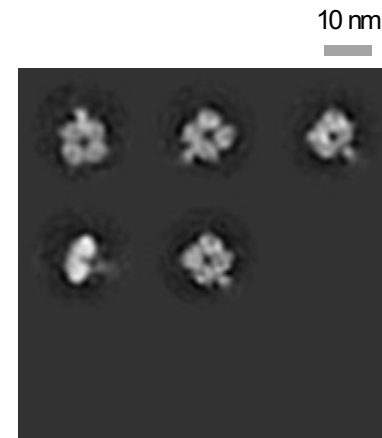

Total particles picked: 6941

Total particles clearly in closed state: 4670

Total particles clearly in open state: 0

# N1-CA09-sNAp-131

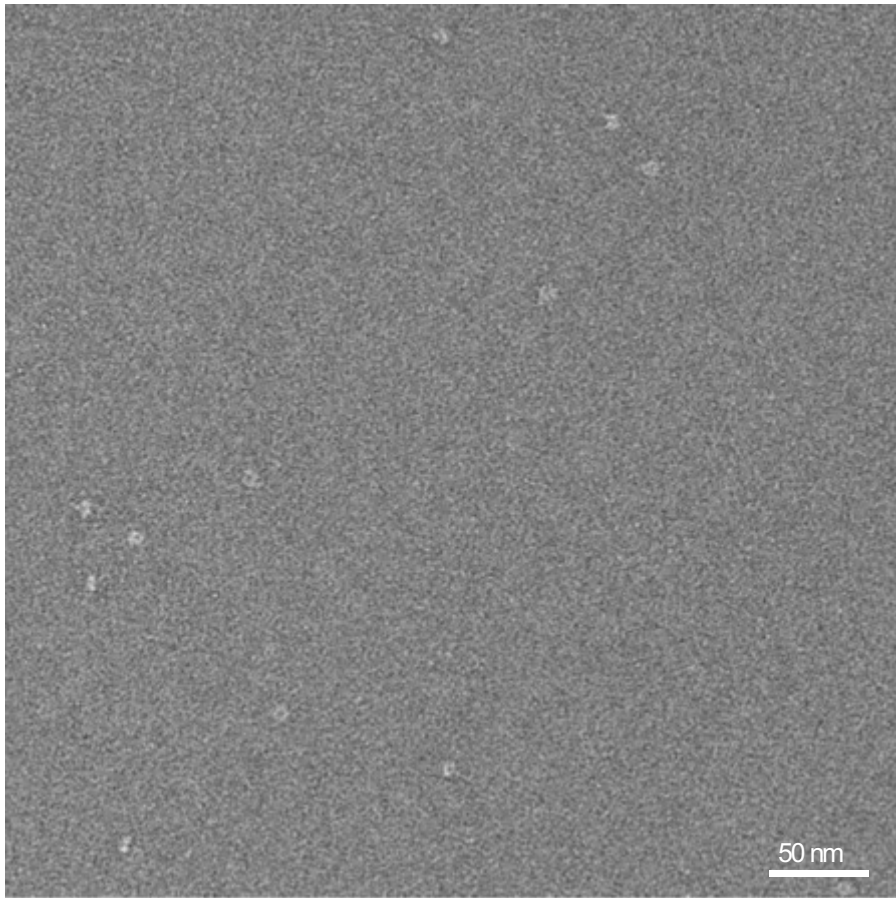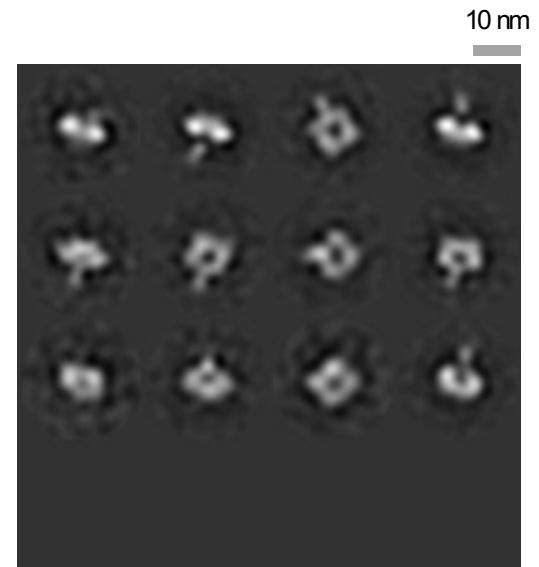

Total particles picked: 2004  
Total particles clearly in closed state: 1508  
Total particles clearly in open state: 0

# N1-CA09-sNAp-134

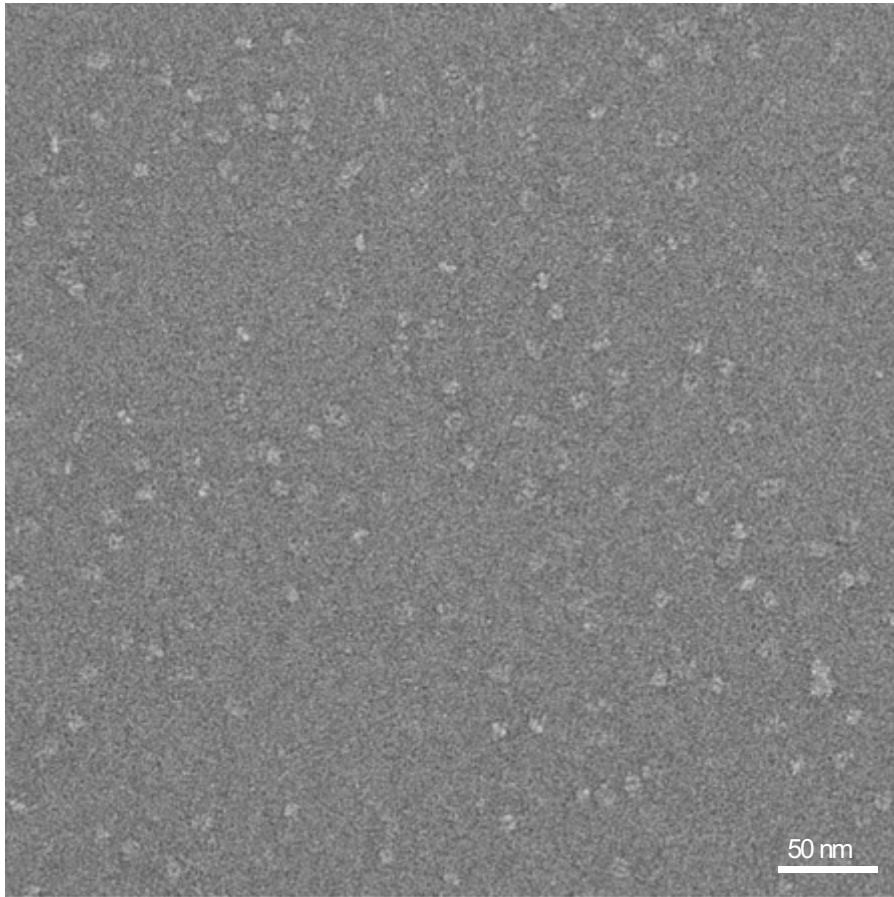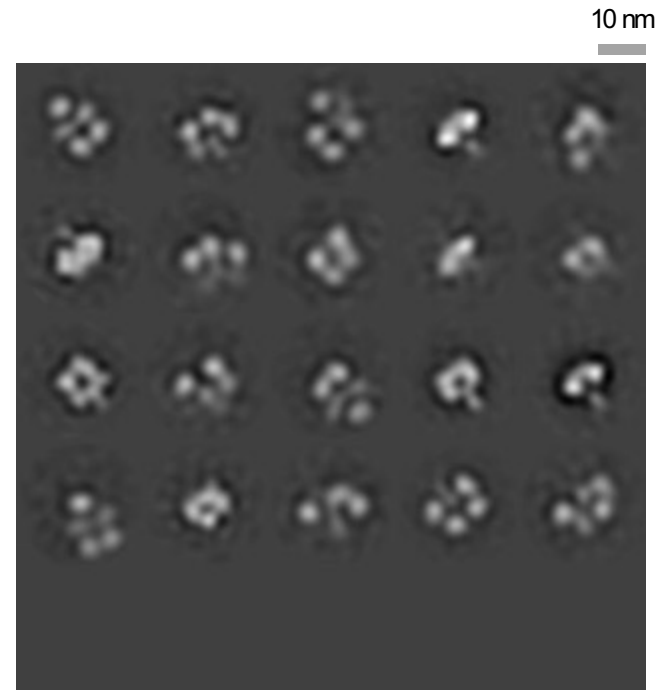

Total particles picked: 16073

Total particles clearly in closed state: 5389

Total particles clearly in open state: 4932

## N1-CA09-sNAp-130 + Stalk

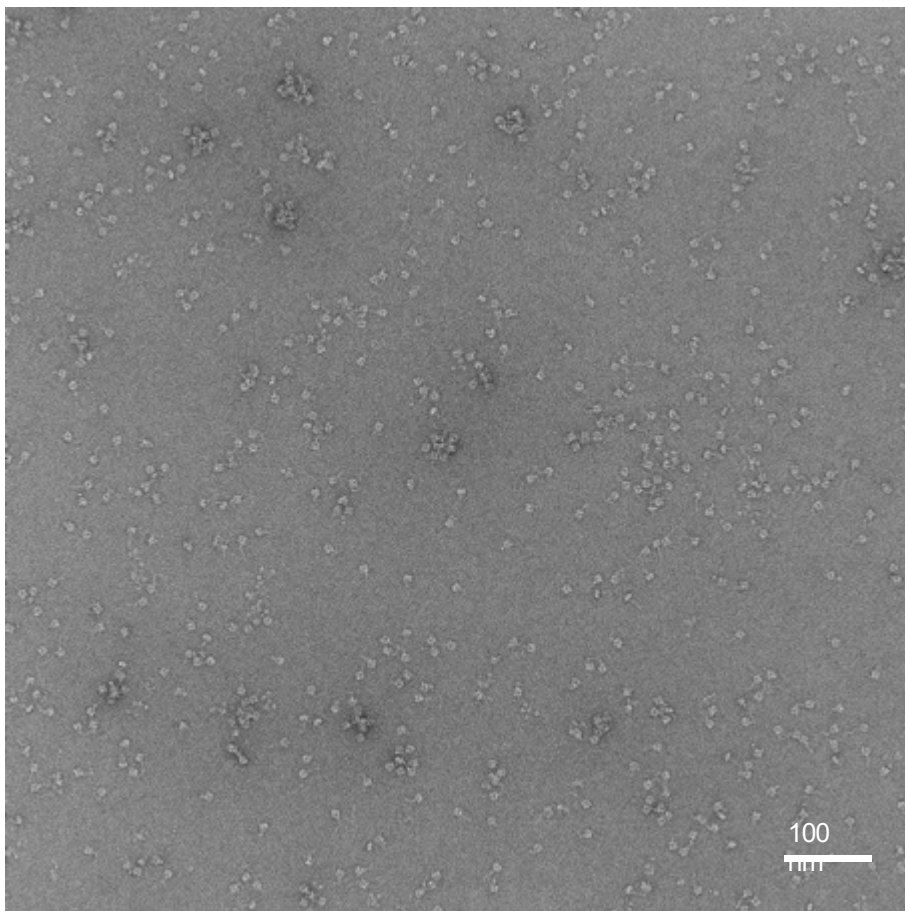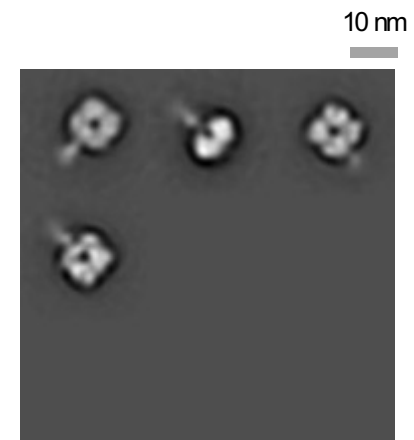

Total particles picked: 12656

Total particles clearly in closed state: 7405

Total particles clearly in open state: 0

## N8-JD13-sNAp-282

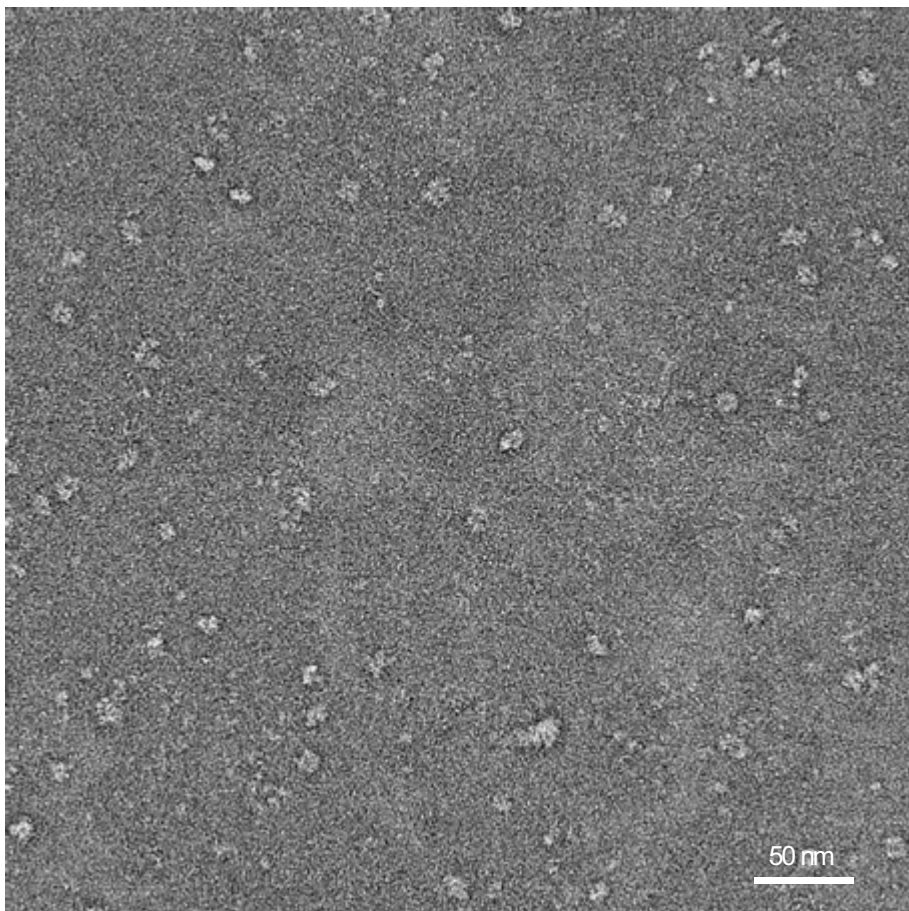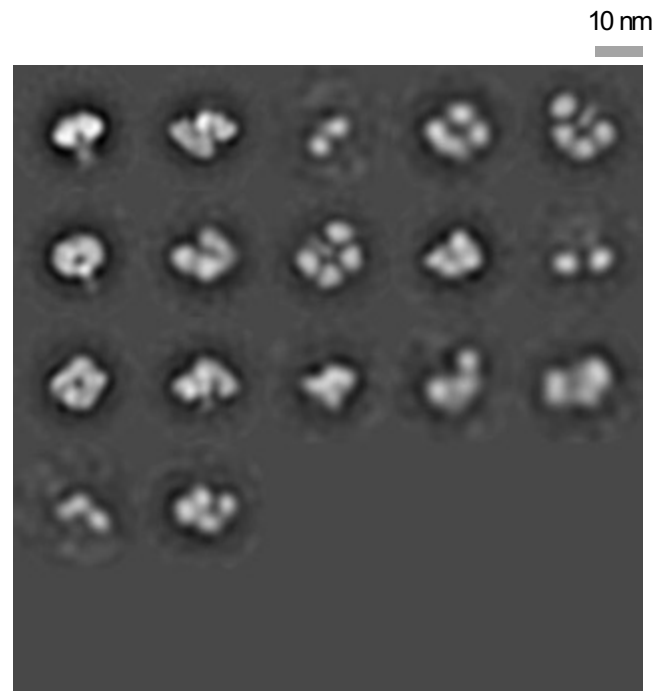

Total particles picked: 6305

Total particles clearly in closed state: 2049

Total particles clearly in open state: 1054

# N8-JD13-sNAp-285

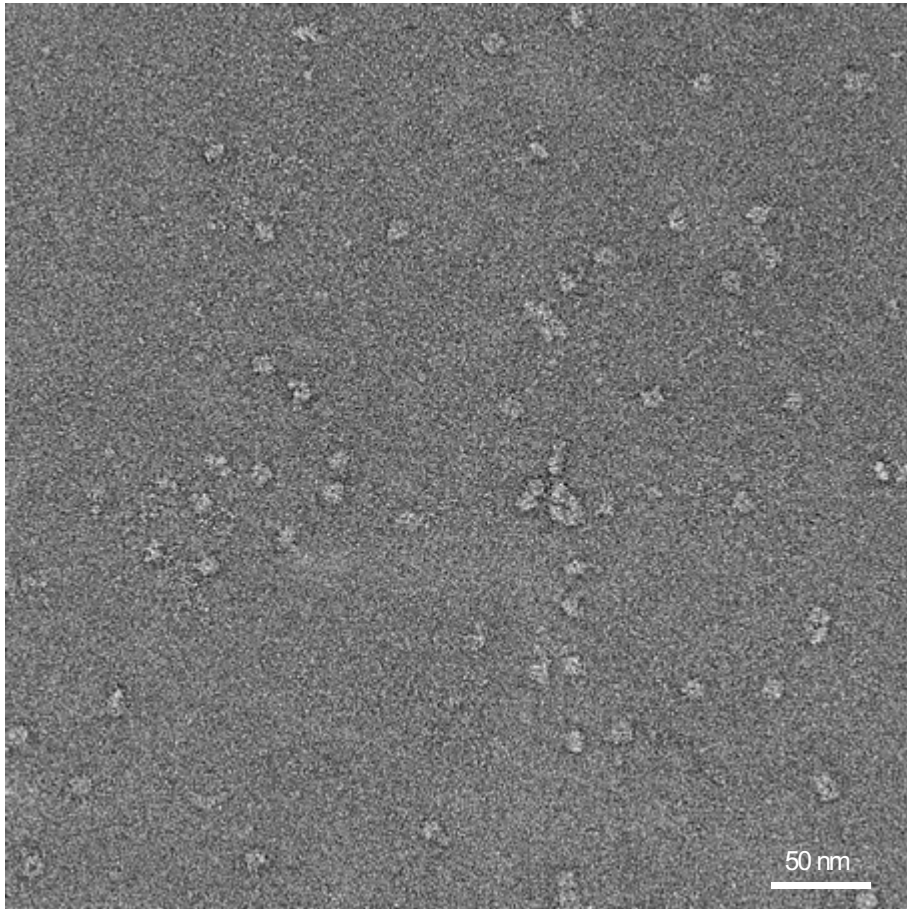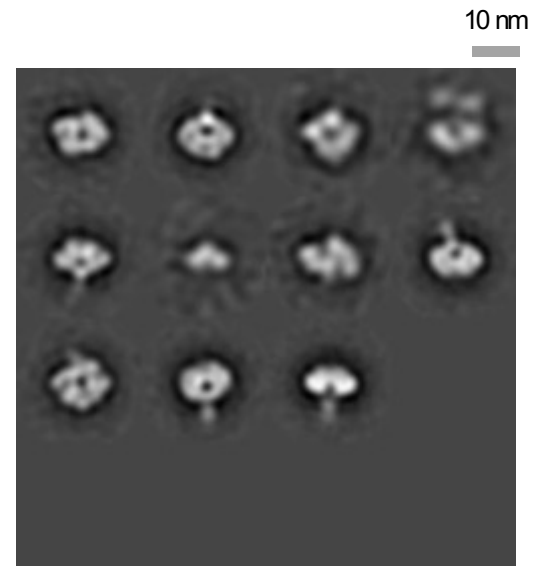

Total particles picked: 7923

Total particles clearly in closed state: 5493

Total particles clearly in open state: 0



## N8-JD13-sNAp-285, time course study - Day 0

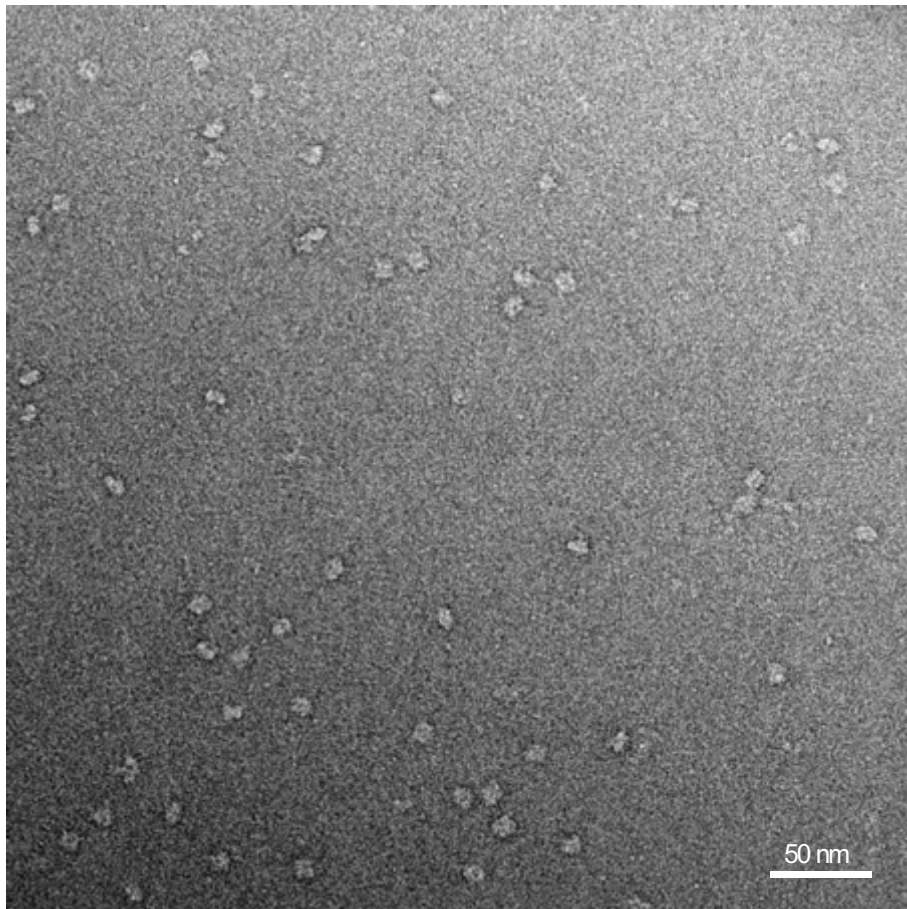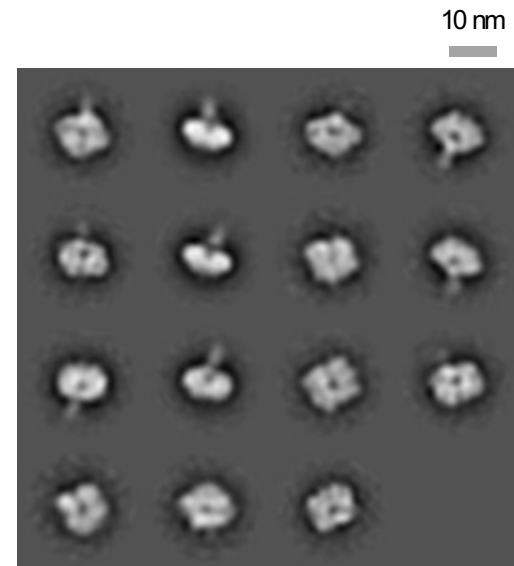

Total particles picked: 7275

Total particles clearly in closed state: 6055

Total particles clearly in open state: 201

## N8-JD13-sNAp-285, time course study - Day 6

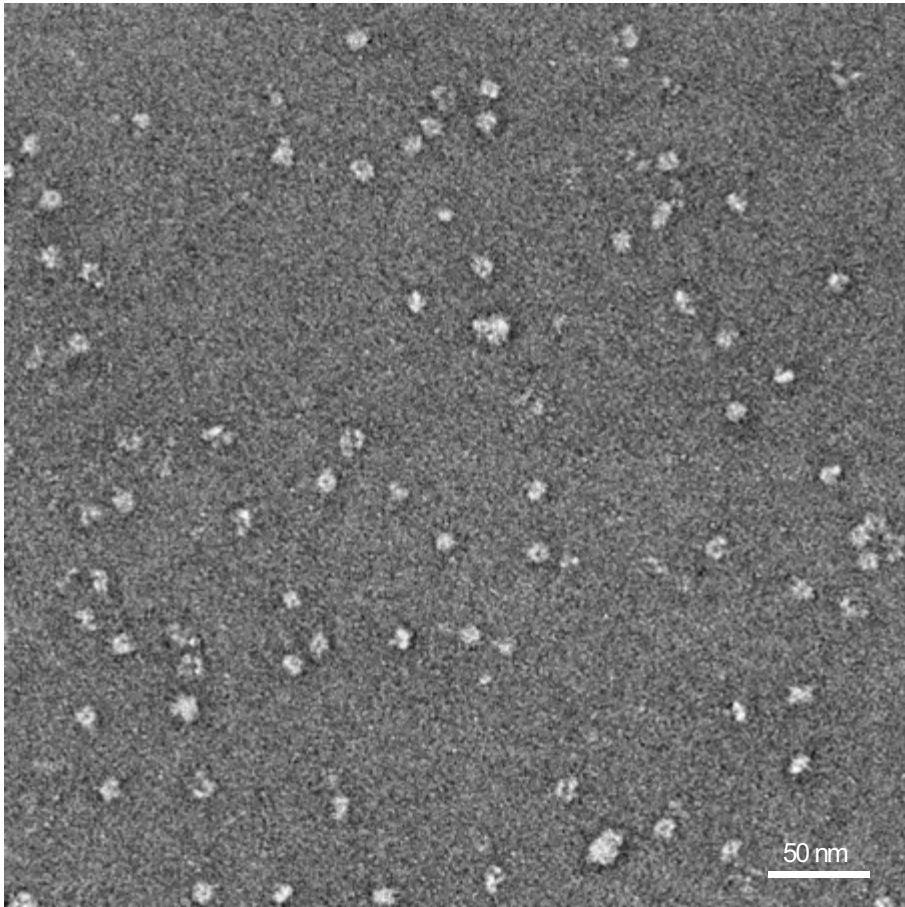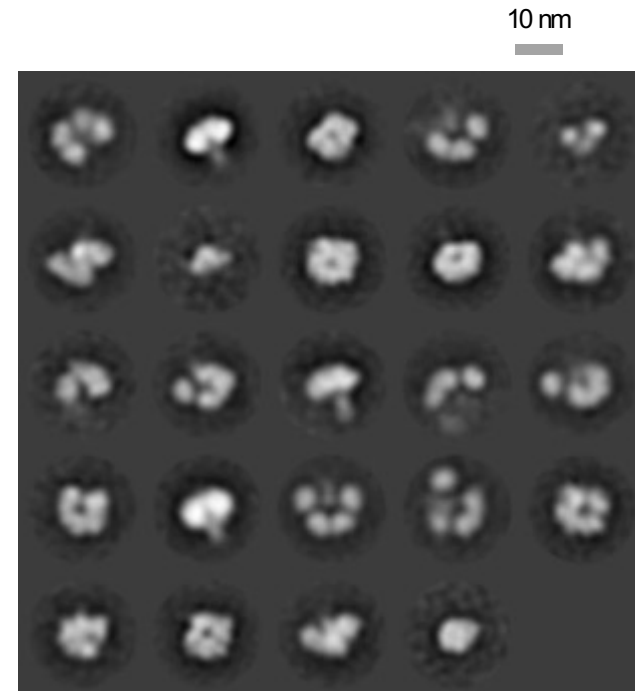

Total particles picked: 7000

Total particles clearly in closed state: 3477

Total particles clearly in open state: 1634

## N2-WI05-desNAp-156

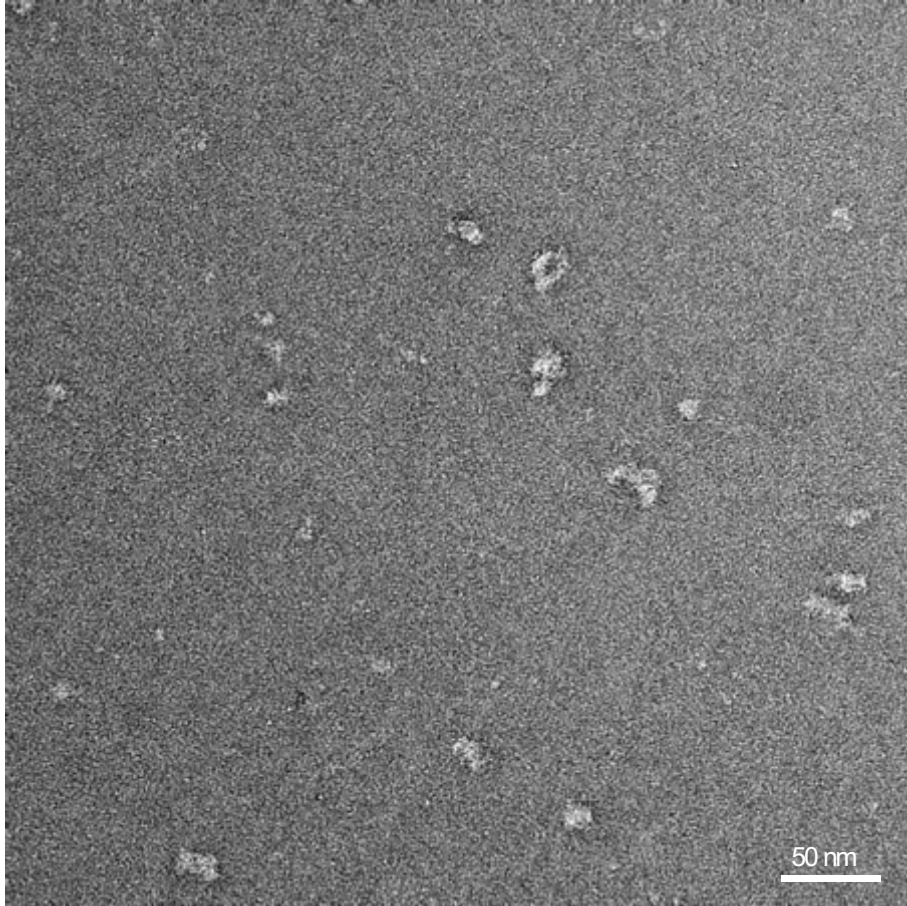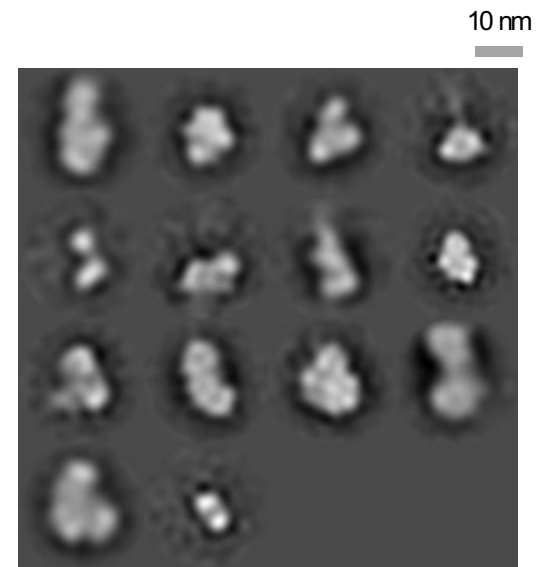

Total particles picked: 5248  
No clear tetramers observed to quantify

# N2-WI05-desNAp-157

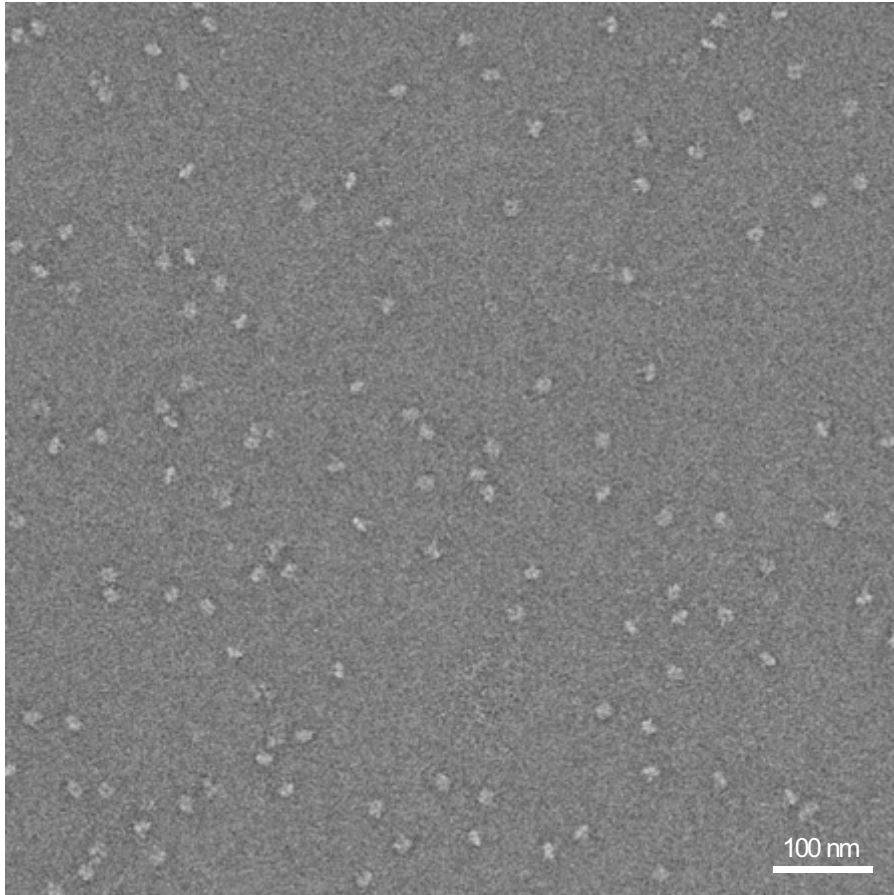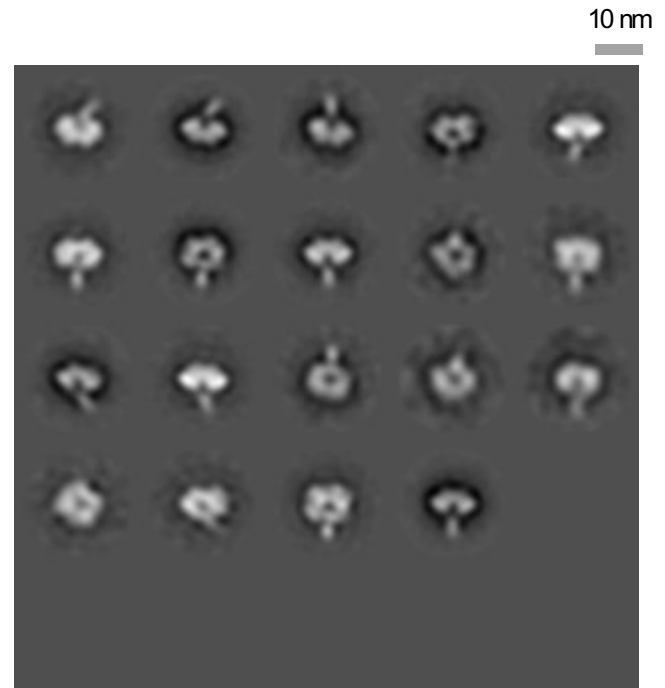

Total particles picked: 7203

Total particles clearly in closed state: 6190

Total particles clearly in open state: 75

## N2-WI05-desNAp-158

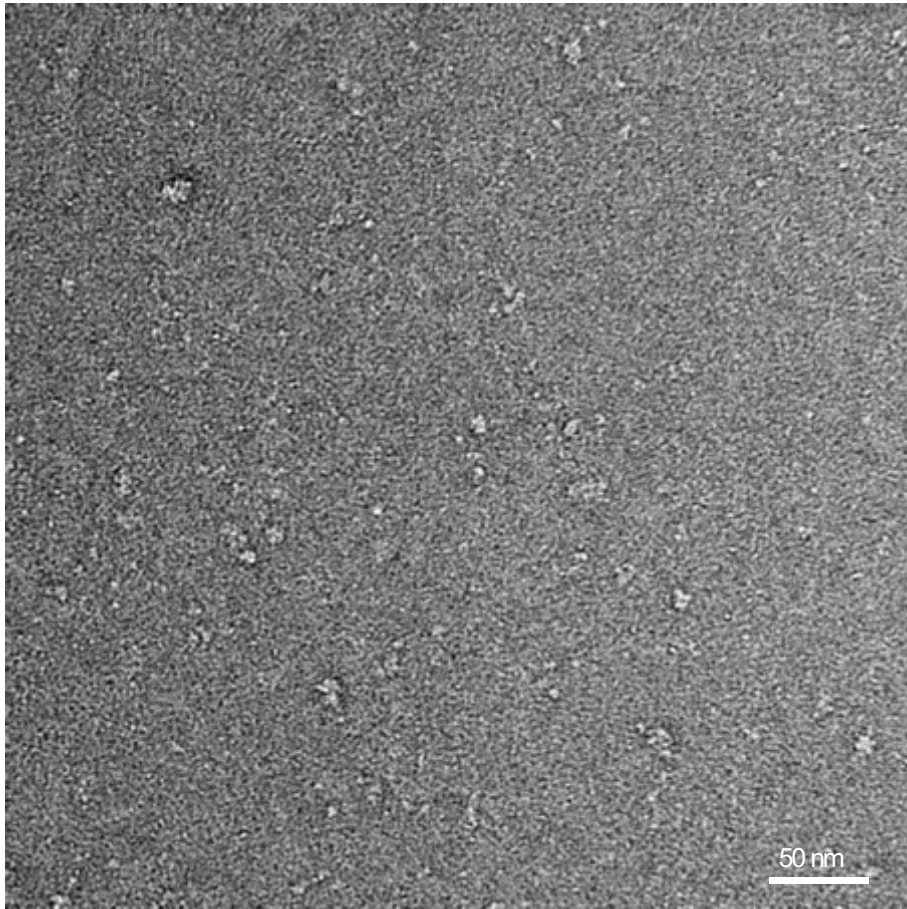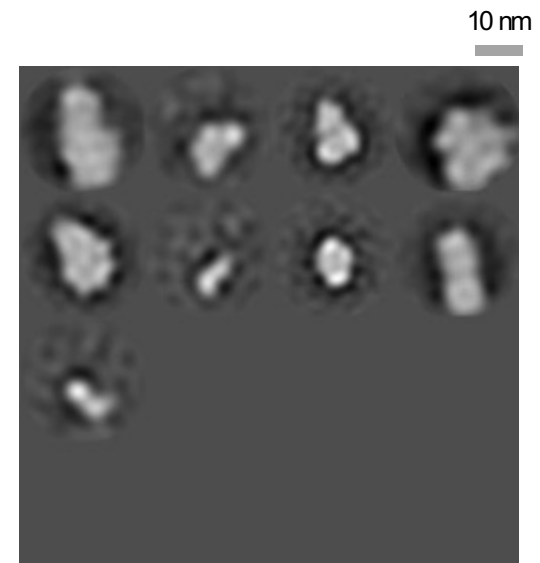

Total particles picked: 5916  
No clear tetramers observed to quantify

## N2-WI05-desNAp-249

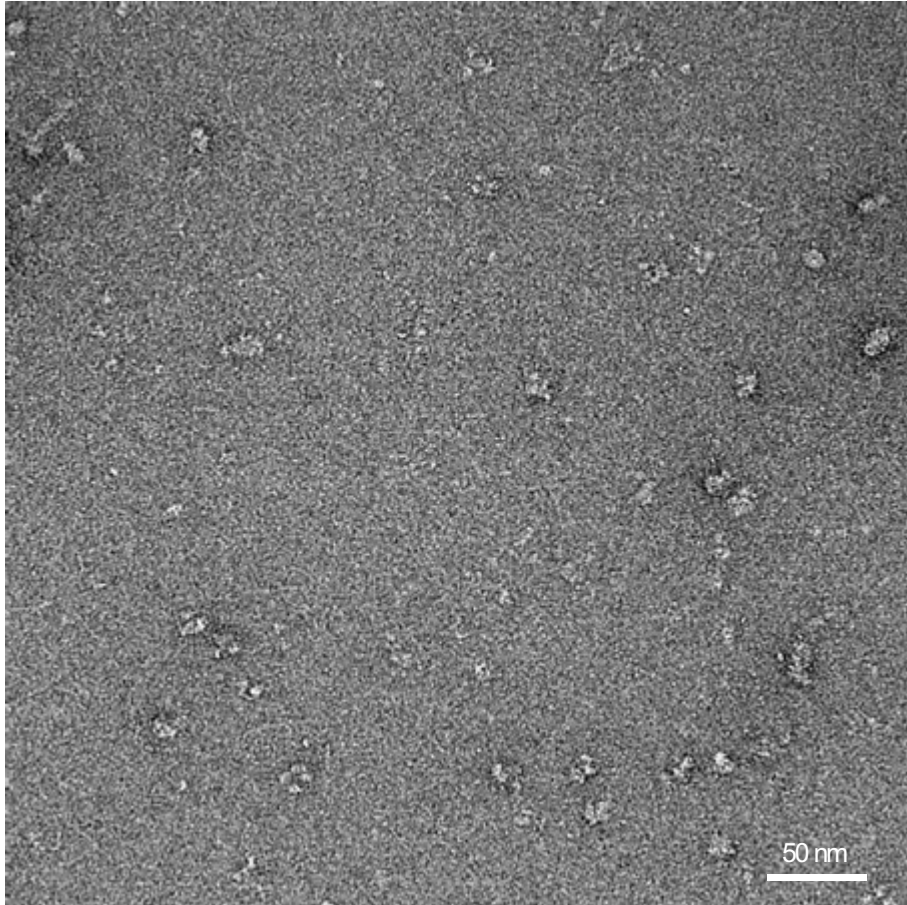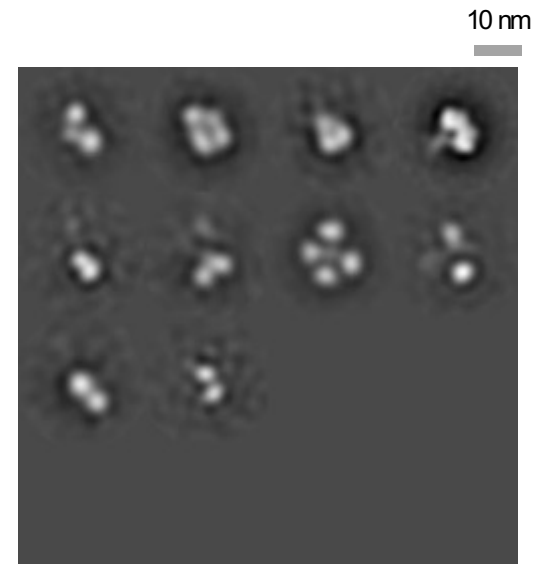

Total particles picked: 8258

Total particles clearly in closed state: 923

Total particles clearly in open state: 981

## N2-WI05-desNAp-255

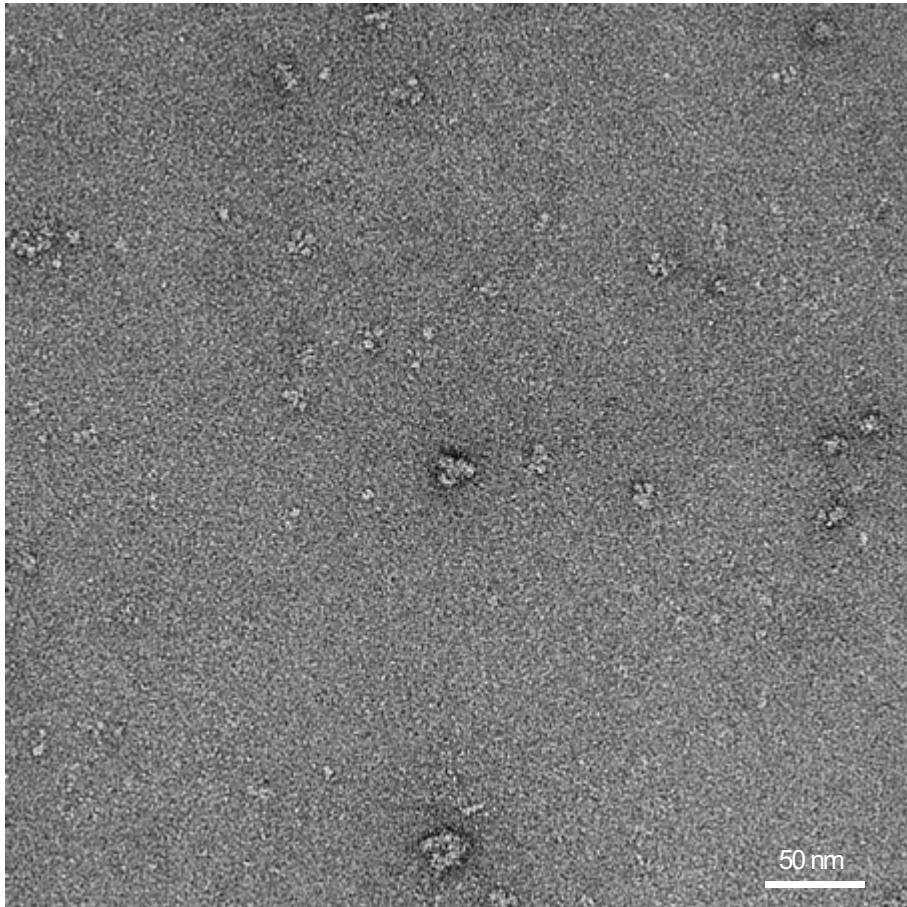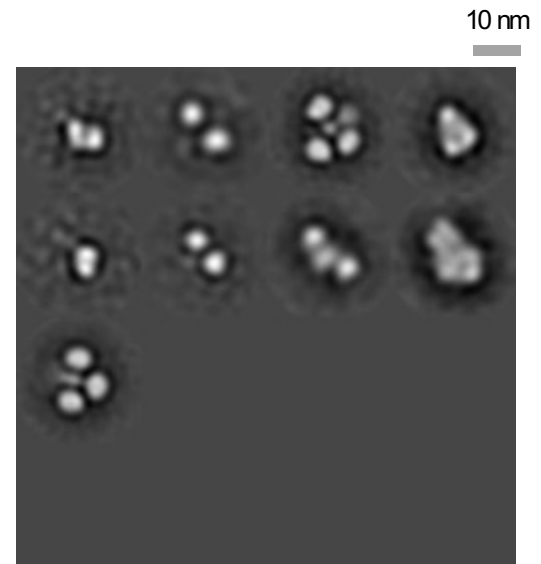

Total particles picked: 6458

Total particles clearly in closed state: 0

Total particles clearly in open state: 1215

# N1-MI15-sNAp-155

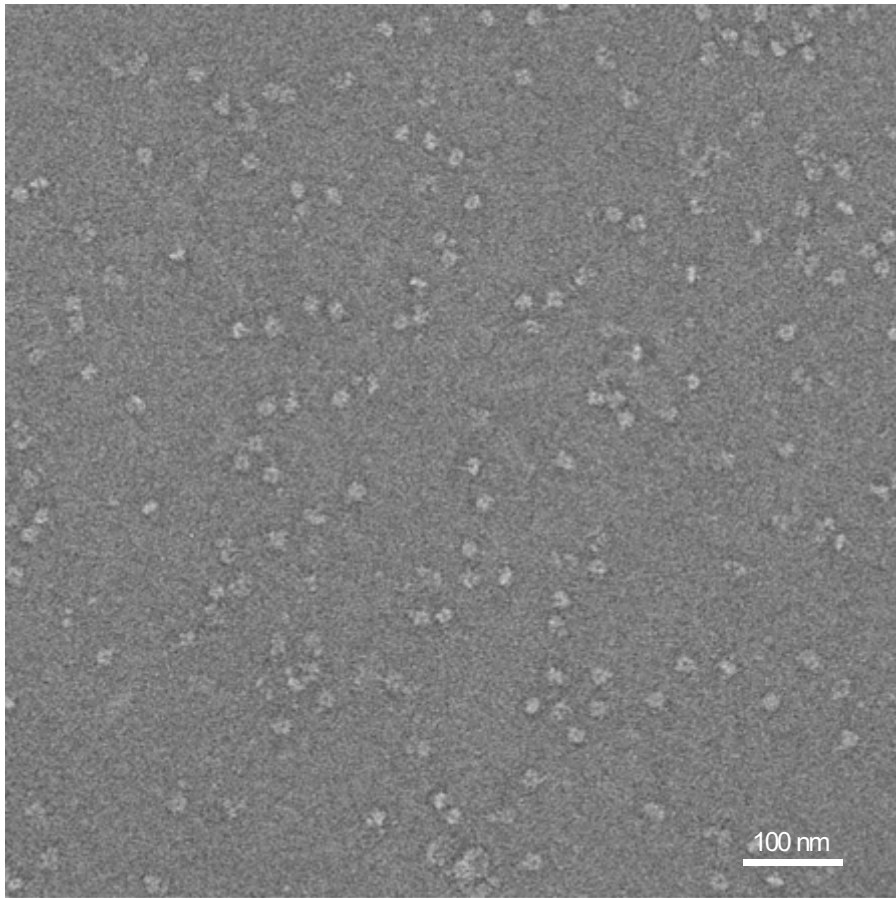

10 nm

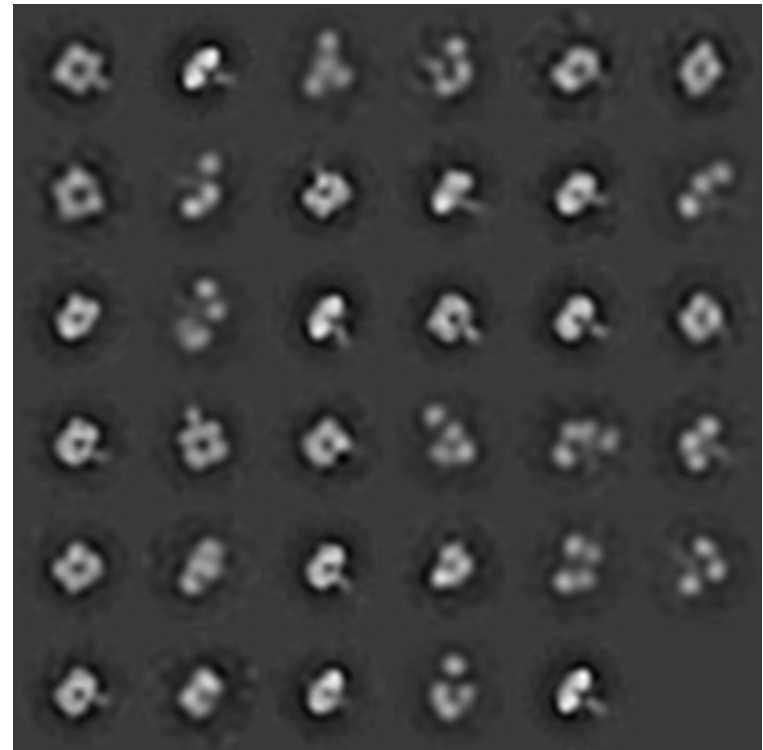

Total particles picked: 9724

Total particles clearly in closed state: 7603

Total particles clearly in open state: 1152



# N1-MI15-sNAp-174

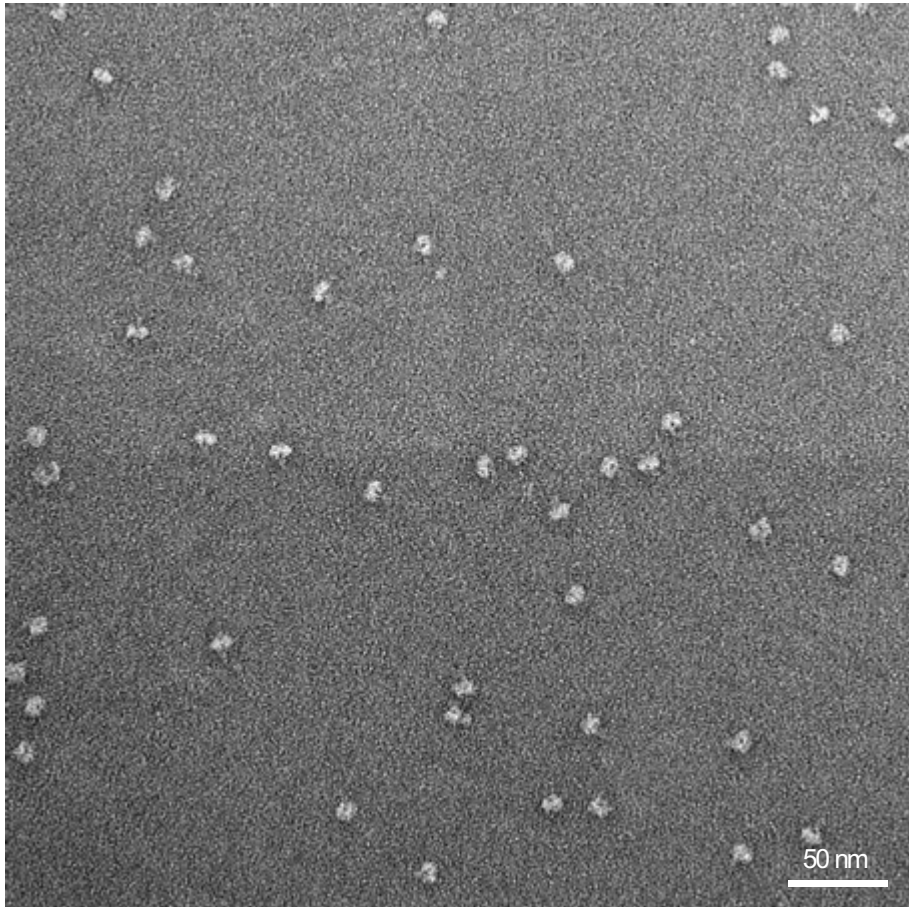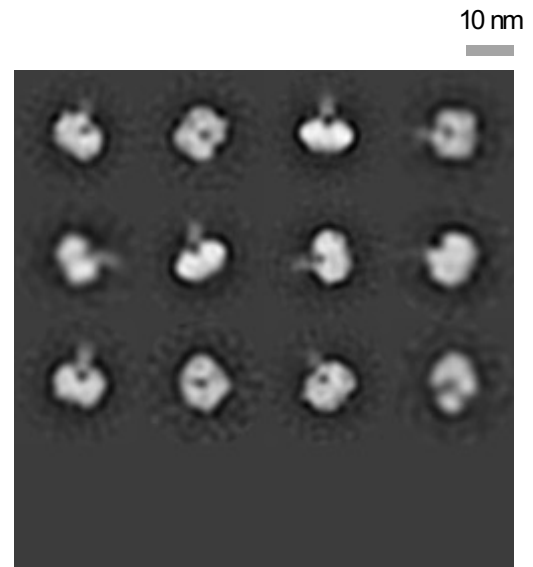

Total particles picked: 3241

Total particles clearly in closed state: 2875

Total particles clearly in open state: 178

## N1-MI15-sNAp-174, time course study - Day 0

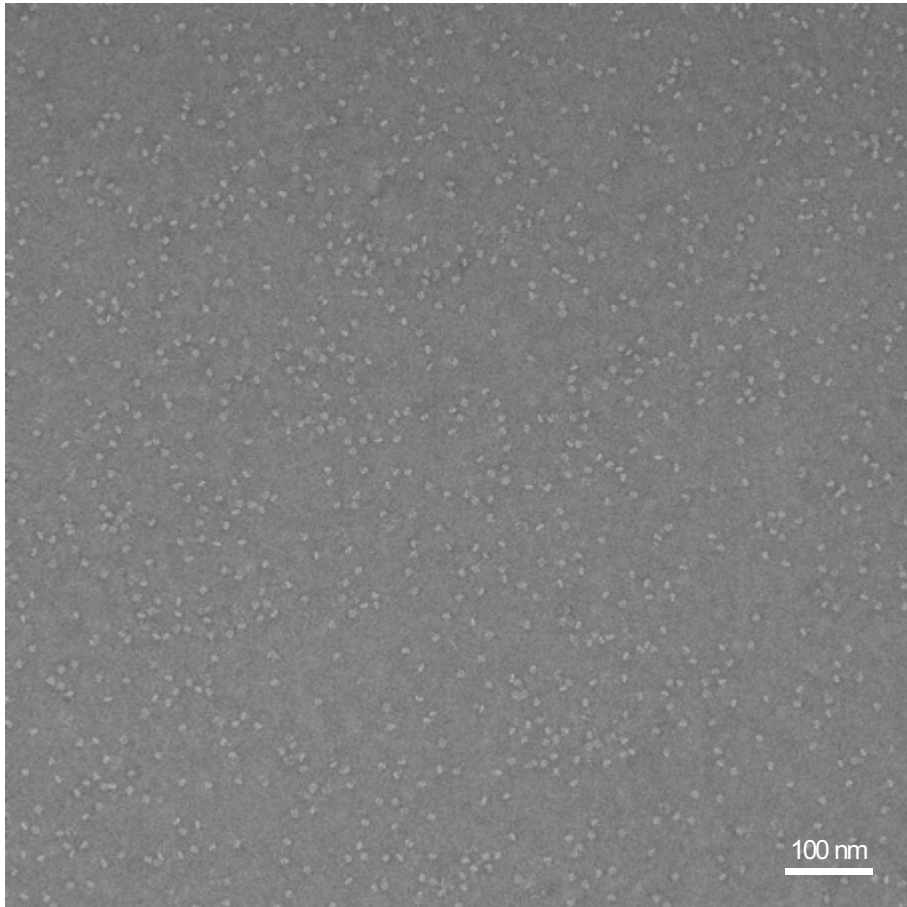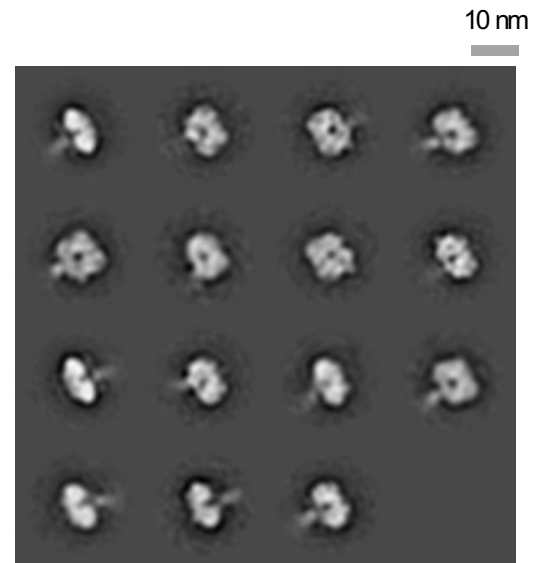

Total particles picked: 6698

Total particles clearly in closed state: 6300

Total particles clearly in open state: 280

## N1-MI15-sNAp-174, time course study - Day 6

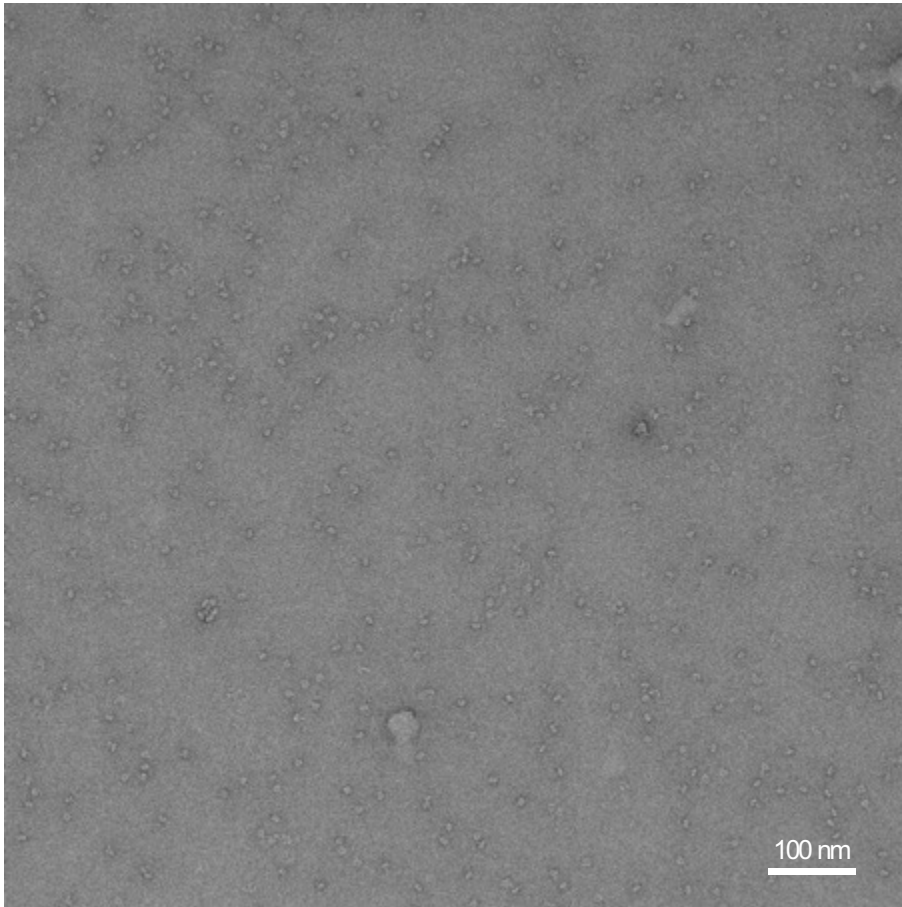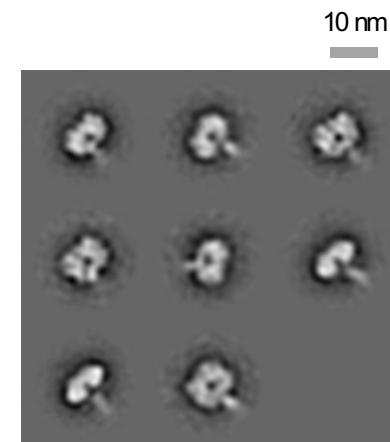

Total particles picked: 3549

Total particles clearly in closed state: 2702

Total particles clearly in open state: 93

## N1-MI15-sNAp-174, time course study - Day 10

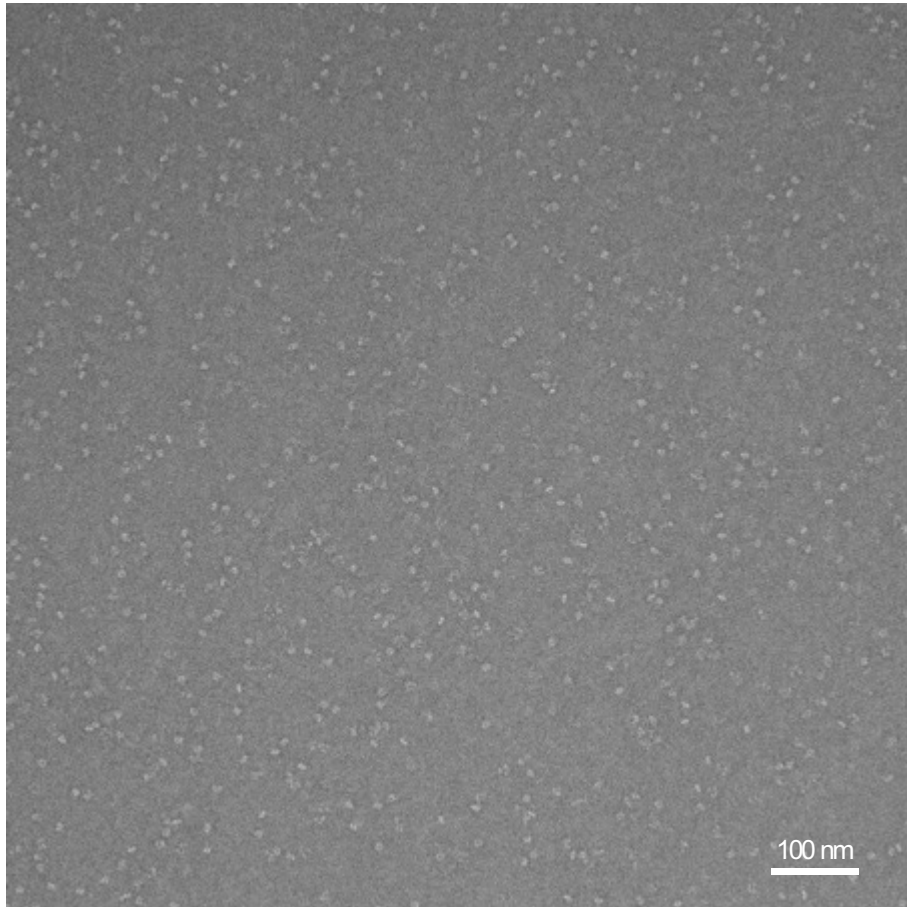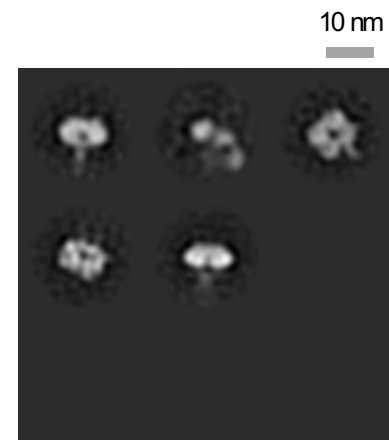

Total particles picked: 5314

Total particles clearly in closed state: 2108

Total particles clearly in open state: 330

## N1-MI15-sNAp-174, time course study - Day 15

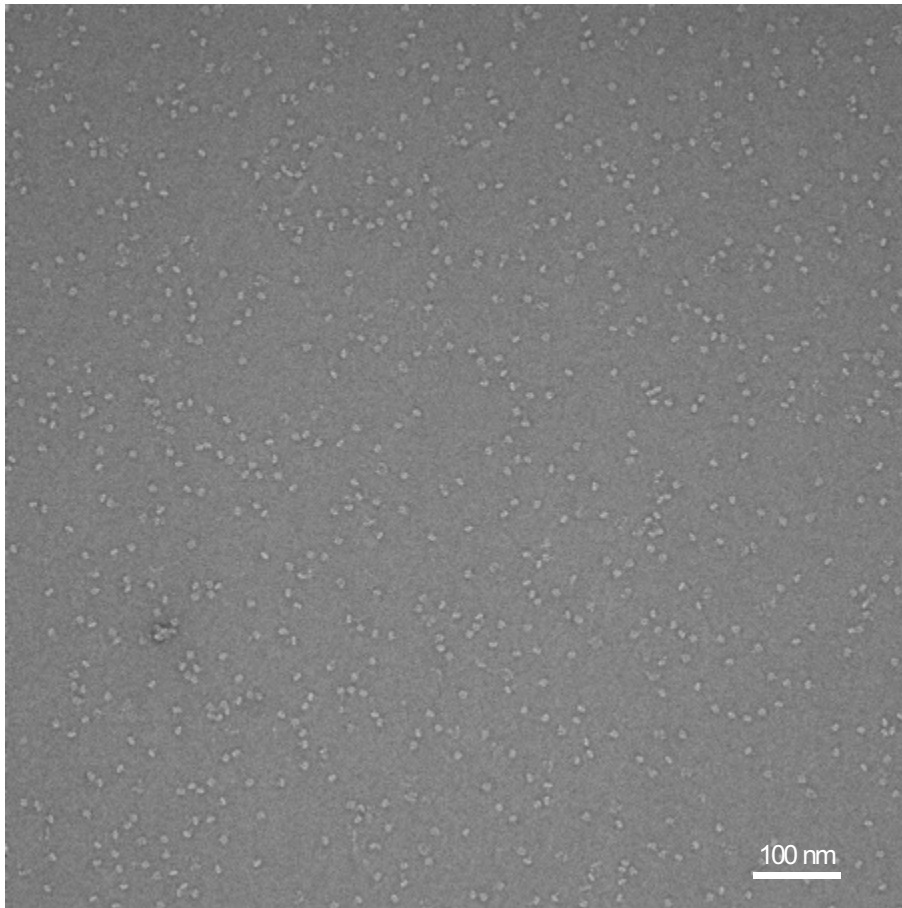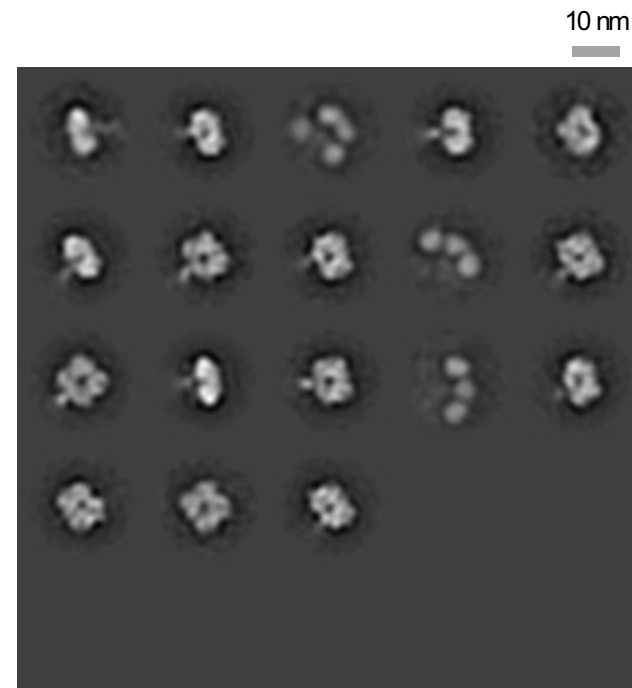

Total particles picked: 6564

Total particles clearly in closed state: 5639

Total particles clearly in open state: 797

# N1-MI15-sNAp-165

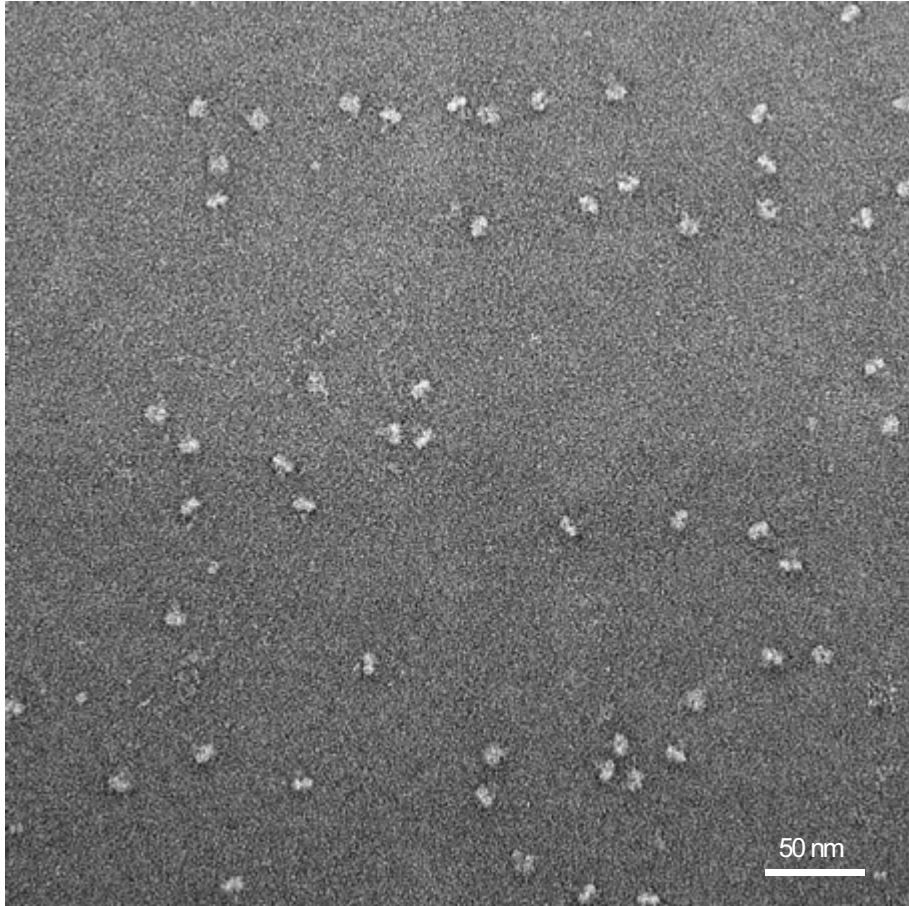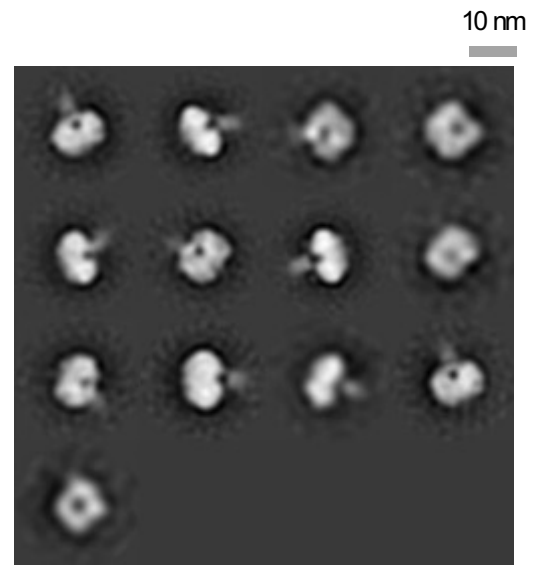

Total particles picked: 4557  
Total particles clearly in closed state: 4202  
Total particles clearly in open state: 0

# N1-MI15-sNAp-176

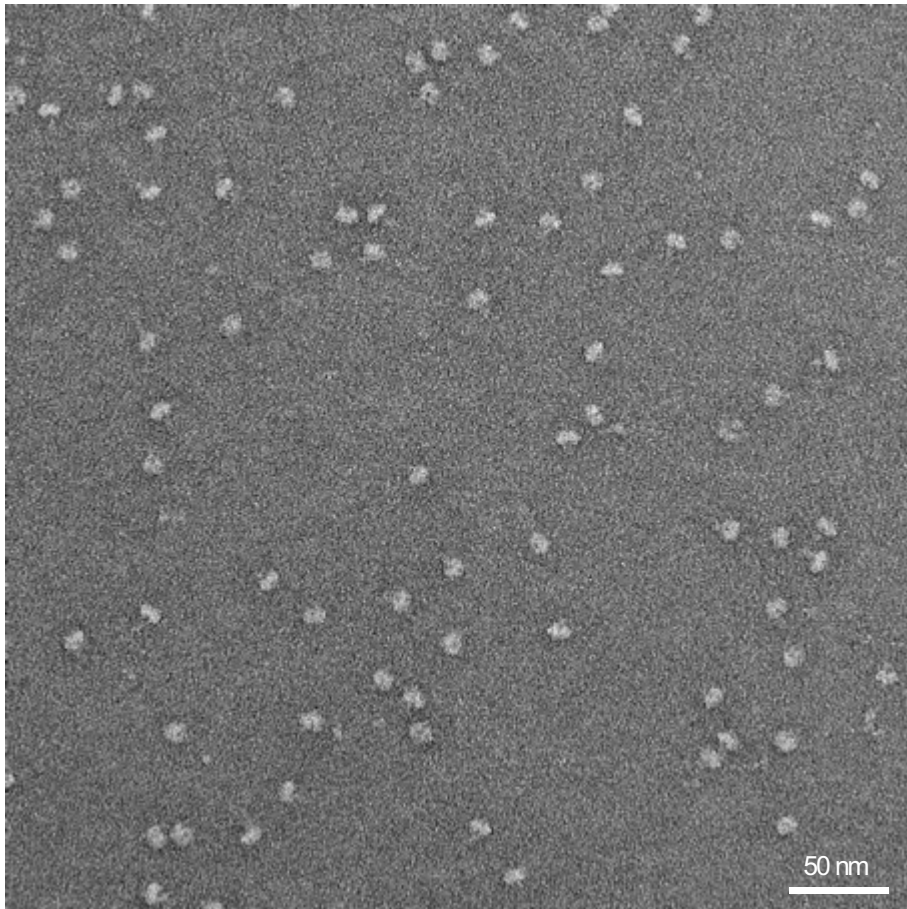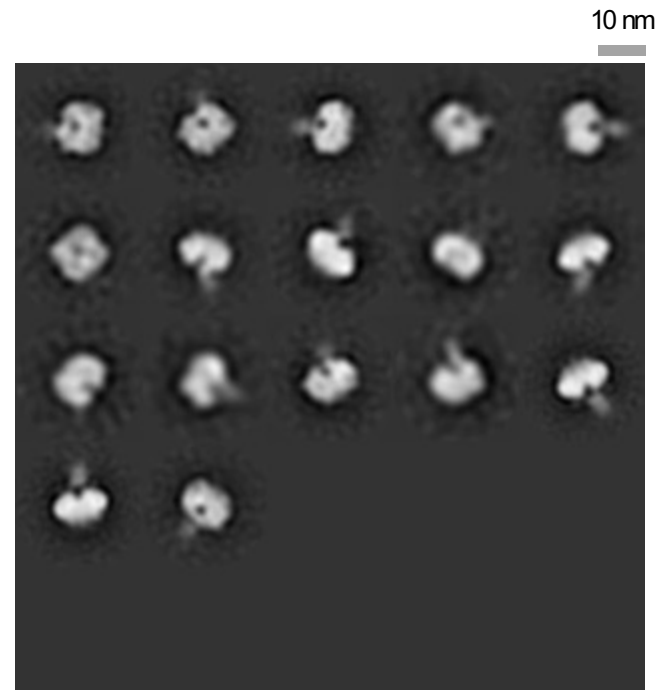

Total particles picked: 6859  
Total particles clearly in closed state: 6507  
Total particles clearly in open state: 0

# N1-MI15-sNAp-183

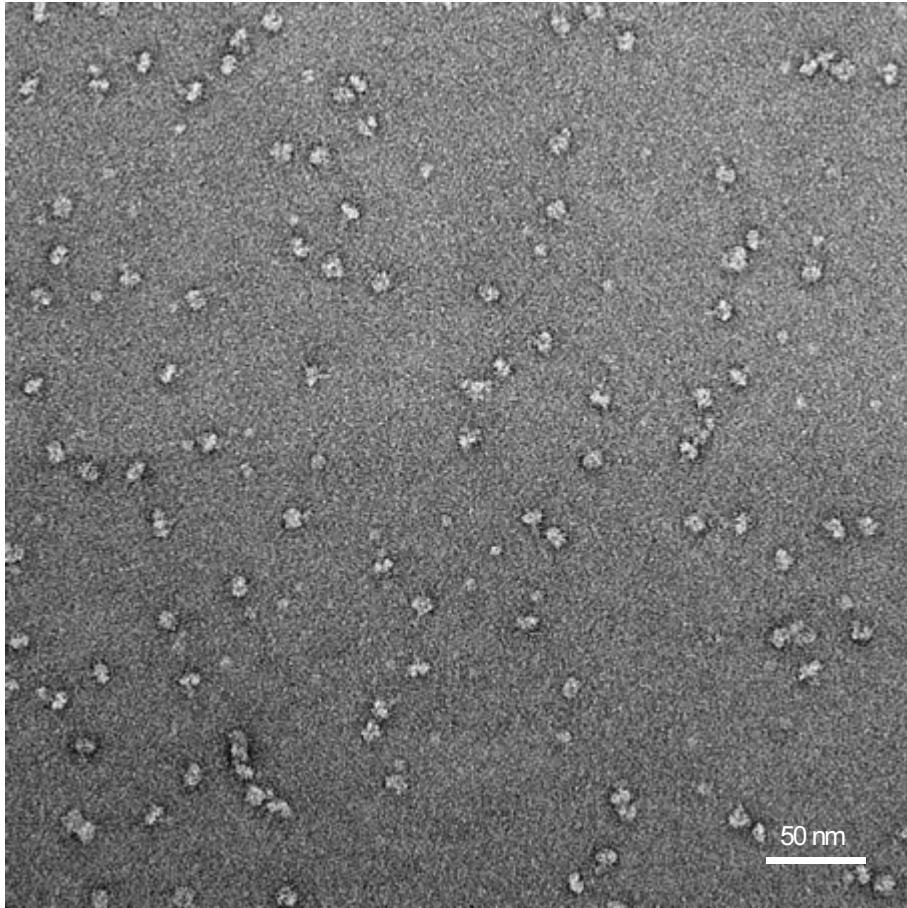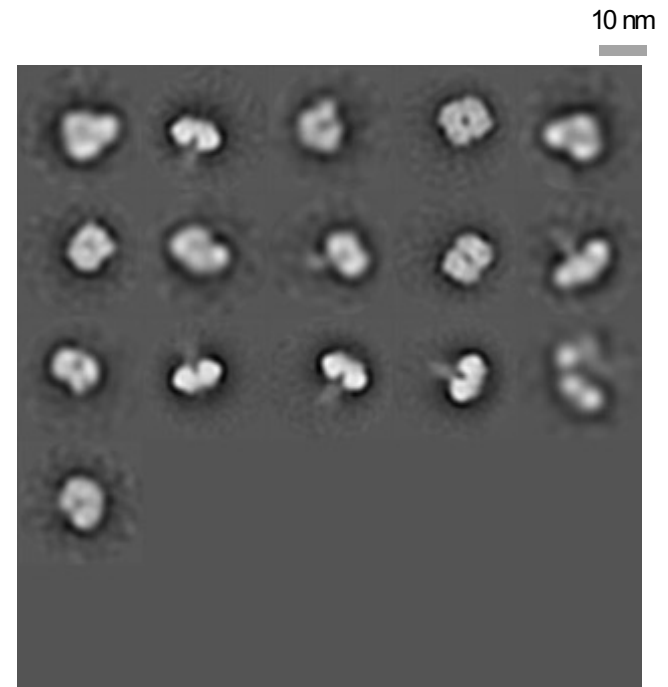

Total particles picked: 7247

Total particles clearly in closed state: 5602

Total particles clearly in open state: 238



# N1-VN04-sNAp-155

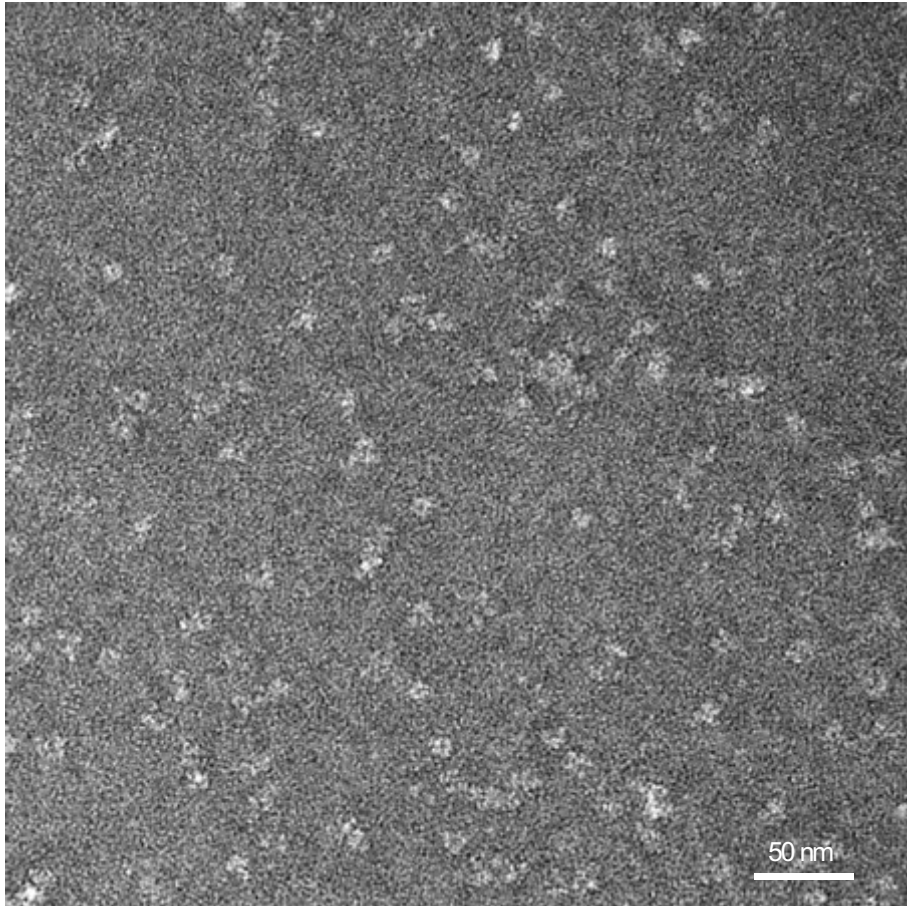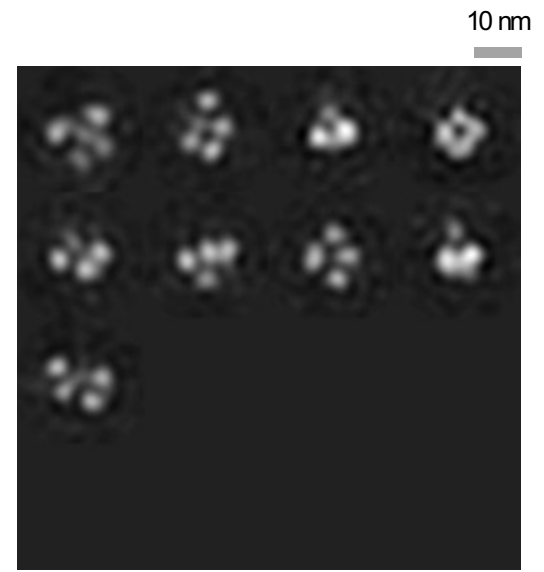

Total particles picked: 3469  
Total particles clearly in closed state: 766  
Total particles clearly in open state: 1578

# N1-VN04-sNAp-354

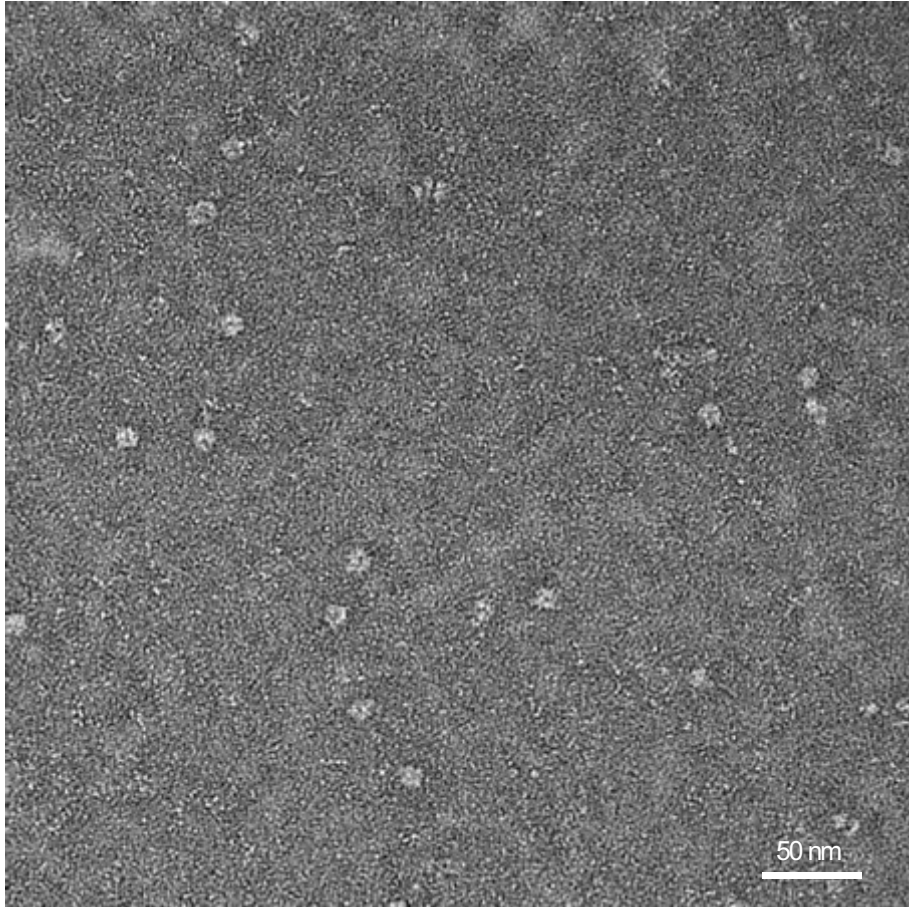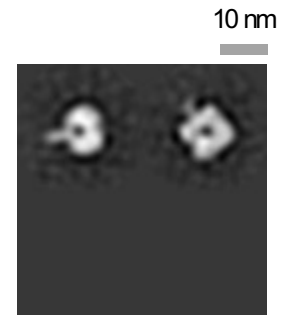

Total particles picked: 2408

Total particles clearly in closed state: 760

Total particles clearly in open state: 0

## N1-WSN33-sNAp-155

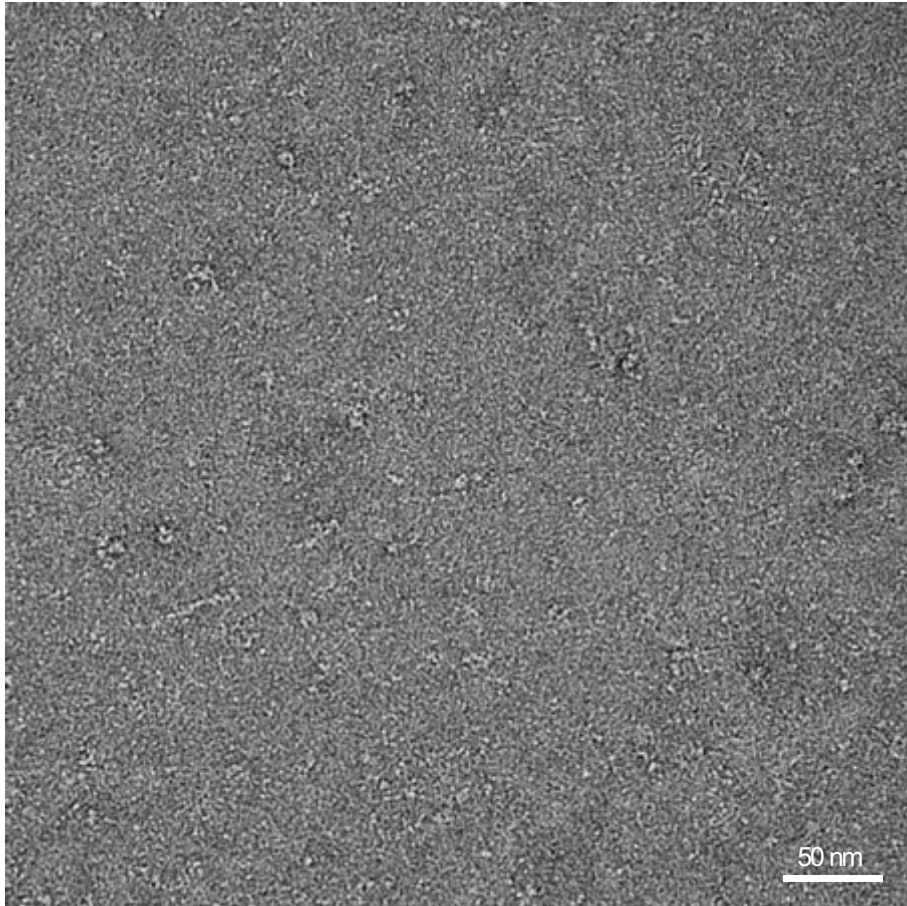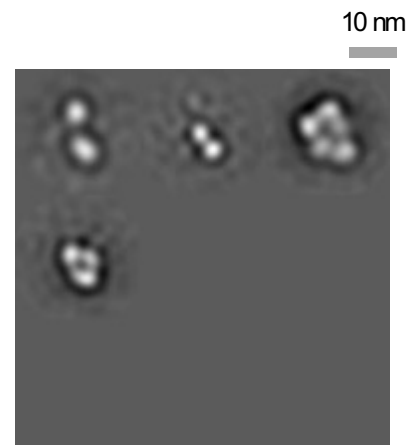

Total particles picked: 9809  
No clear tetramers observed to quantify

# N1-WSN33-sNAp-366

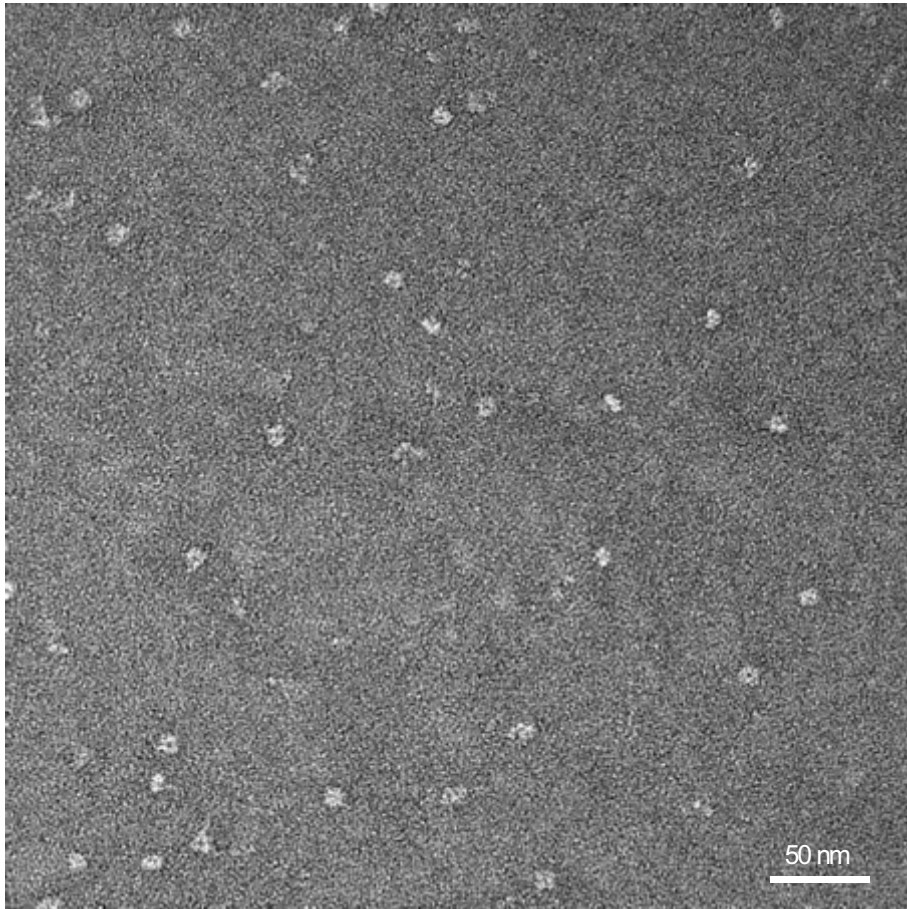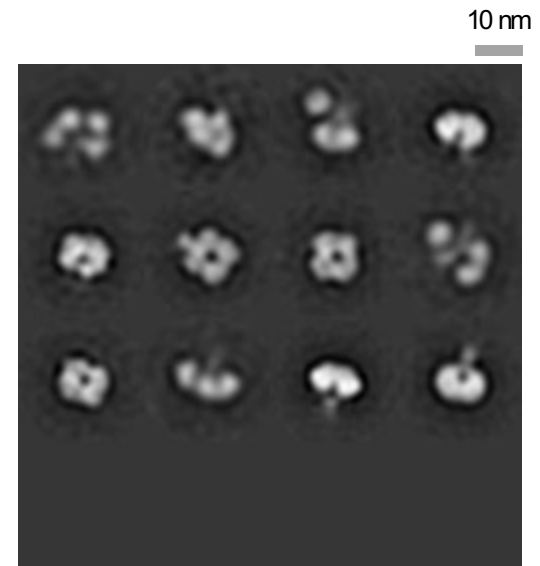

Total particles picked: 5272

Total particles clearly in closed state: 2963

Total particles clearly in open state: 662

# N1-WSN33-sNAp-367

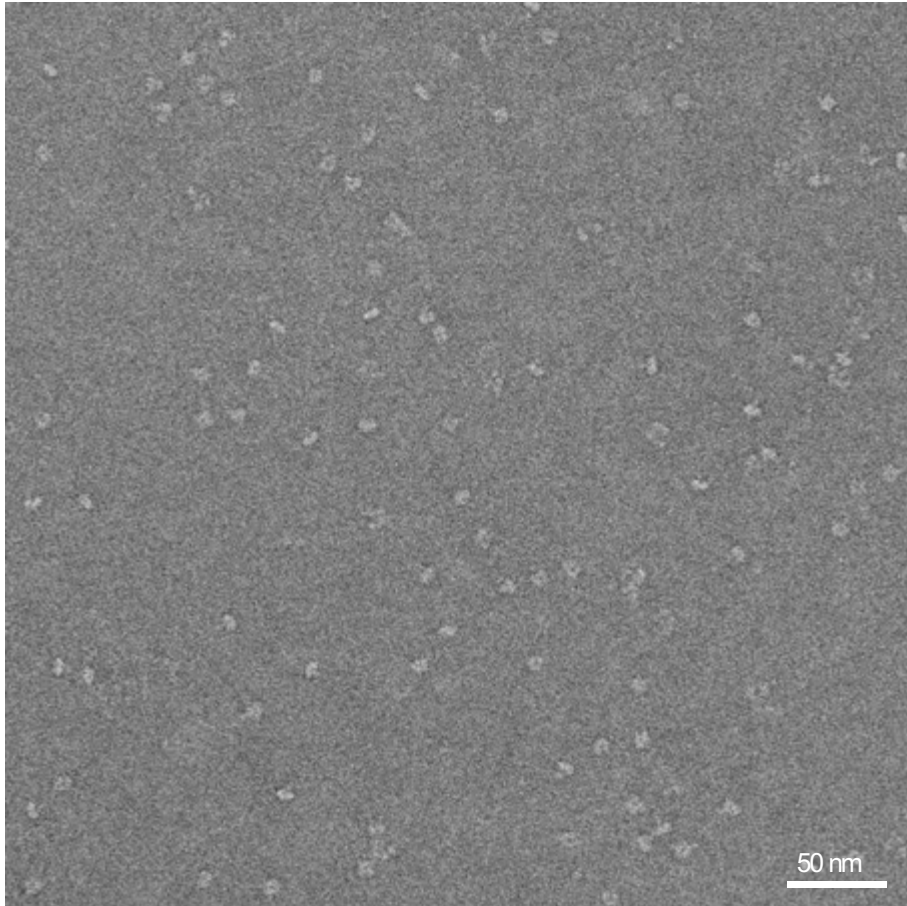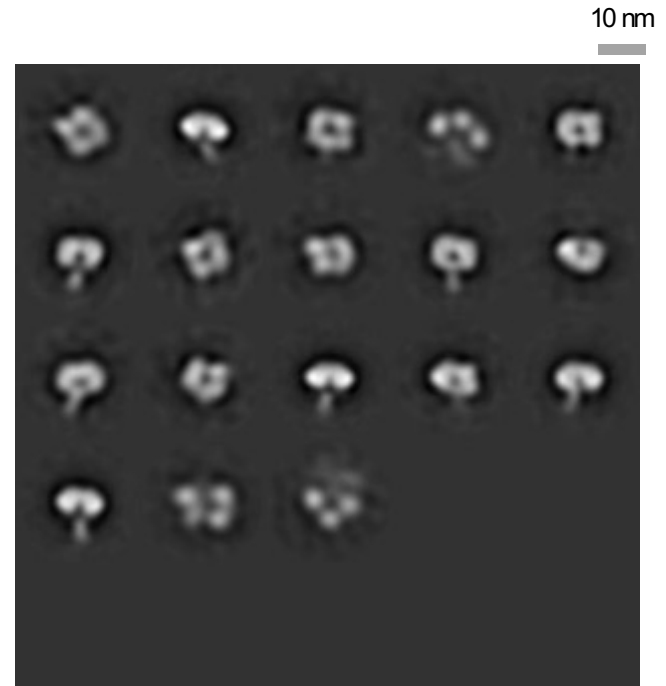

Total particles picked: 16395

Total particles clearly in closed state: 12678

Total particles clearly in open state: 856

# N1-WSN33-sNAp-375

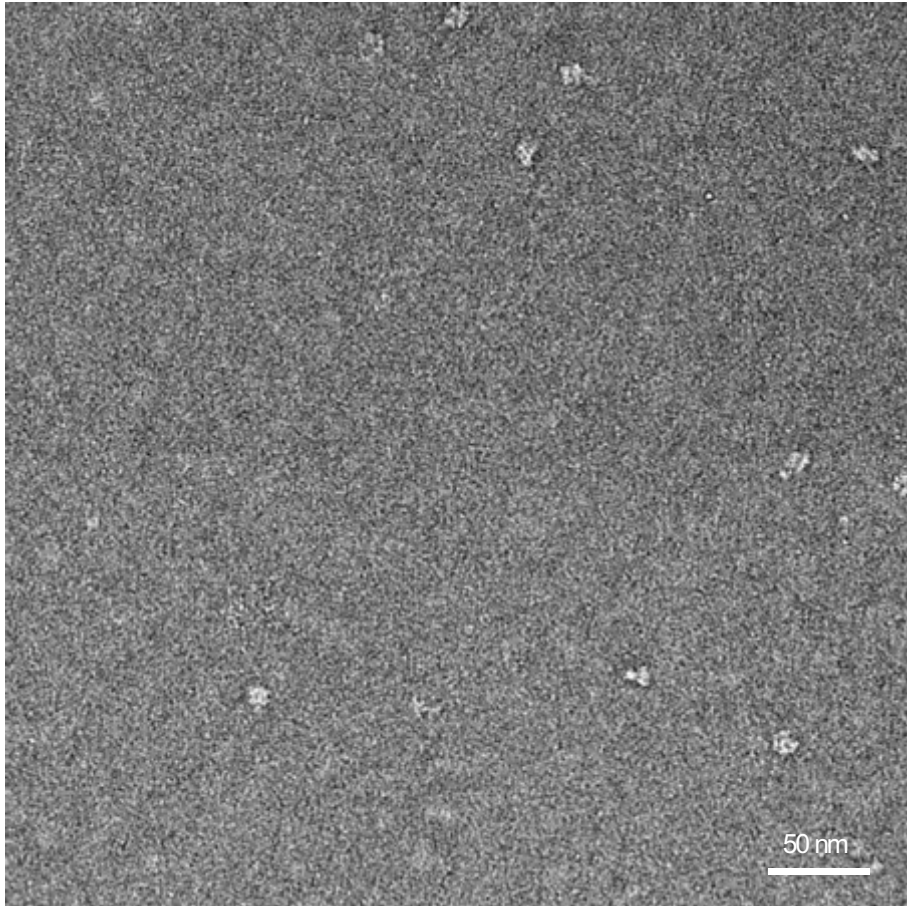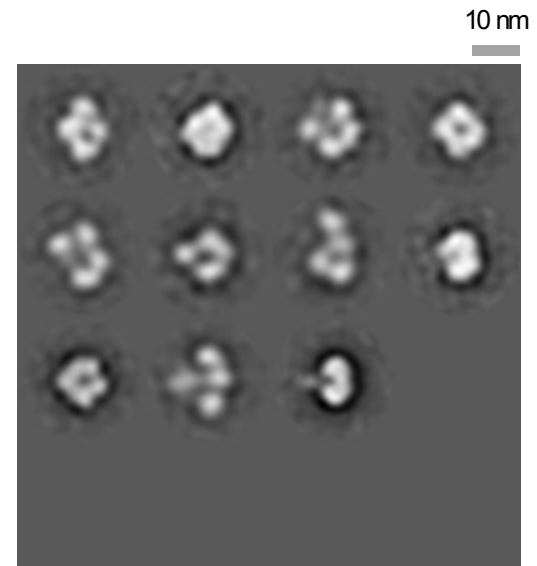

Total particles picked: 1198

Total particles clearly in closed state: 453

Total particles clearly in open state: 374

# N1-WSN33-sNAp-378

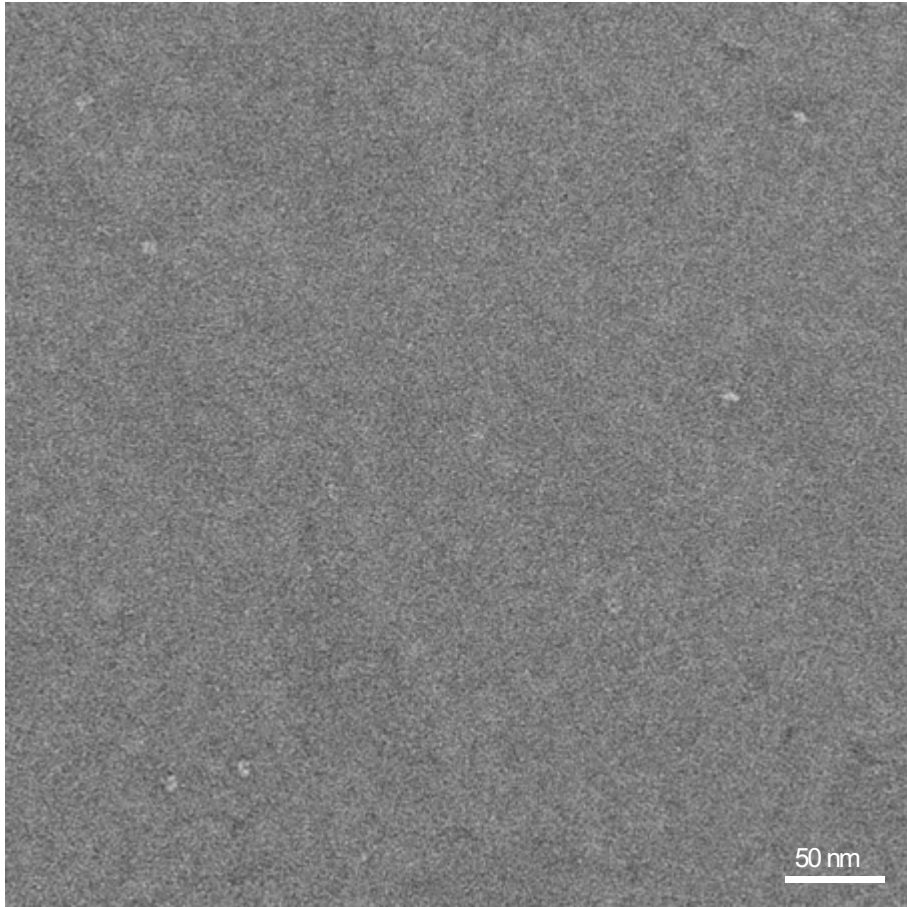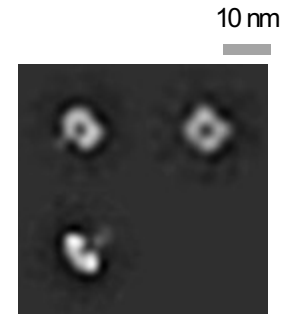

Total particles picked: 4065

Total particles clearly in closed state: 1213

Total particles clearly in open state: 0

# N1-CA09-sNAp-155-T466A

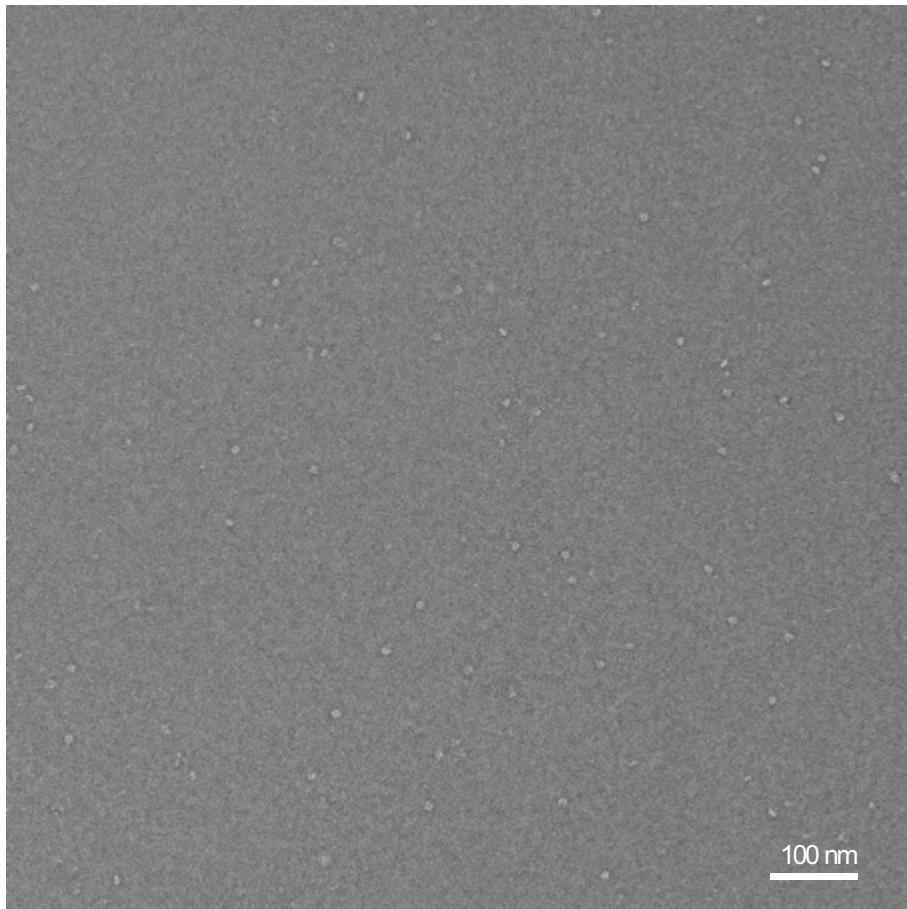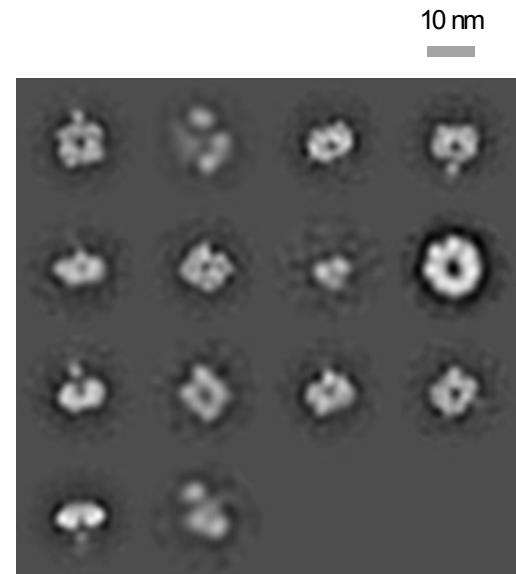

Total particles picked: 4544

Total particles clearly in closed state: 2339

Total particles clearly in open state: 390
